# Supplementary material for: Computational study of the photophysical properties and electronic structure of iridium(iii) photosensitizer complexes with electron-withdrawing groups
Source: Royal Society of Chemistry journal article supplement (doi:10.1039/d3cp04900k), 2023-01-01
Supplement: d3cp04900k1.pdf [file d3cp04900k1.pdf]

## Supporting Information

### Computational Study of the Photophysical Properties and Electronic Structure of Iridium(III) Photosensitizers Complexes with Electron-Withdrawing Groups

Yunlong Shang<sup>1,5</sup>, Zhoujie Zhang<sup>2</sup>, Mengping Huang<sup>2</sup>, Na Shu<sup>2</sup>, Hanyu Luo<sup>2</sup>, Qiyan Cao<sup>2</sup>, Bingbing Fan<sup>2</sup>, Yu Han<sup>2</sup>, Min Fang<sup>2,3\*</sup>, Yong Wu<sup>2\*</sup>, Jiawei Xu<sup>4,5\*</sup>

1. Laboratory of Molecular Modeling and Design, State Key Laboratory of Molecular Reaction Dynamics, Dalian Institute of Chemical Physics, Chinese Academy of Sciences, Dalian 116023, Liaoning, P. R. China.
2. Jiangsu Key Laboratory for Numerical Simulation of Large-Scale Complex Systems (NSLSCS) and School of Chemistry and Materials Science, Nanjing Normal University, Nanjing 210023, Jiangsu, P. R. China.
3. State Key Laboratory of Coordination Chemistry, Nanjing University, Nanjing 210023, Jiangsu, P. R. China.
4. State Key Laboratory of Structural Chemistry, Fujian Institute of Research on the Structure of Matter, Chinese Academy of Sciences, Fuzhou 350002, Fujian, P. R. China.
5. School of Chemical Science, University of Chinese Academy of Sciences, Beijing 100190, P. R. China.

\*Corresponding Authors: [fangmin@njnu.edu.cn](mailto:fangmin@njnu.edu.cn) (M. Fang)  
[wuyong@njnu.edu.cn](mailto:wuyong@njnu.edu.cn) (Y. Wu)  
[xujiawei@fjirsm.ac.cn](mailto:xujiawei@fjirsm.ac.cn) (J. Xu)

## 0. Menu

|                                                                          |           |
|--------------------------------------------------------------------------|-----------|
| <b>0. Menu .....</b>                                                     | <b>1</b>  |
| <b>1. Supplemental Figures .....</b>                                     | <b>2</b>  |
| <b>1.1 Comparison of Structures with RMSD Value .....</b>                | <b>2</b>  |
| <b>1.2 Isosurfaces of Fragment or Complex Orbitals .....</b>             | <b>3</b>  |
| <b>1.3 Density of States of Ir1.....</b>                                 | <b>4</b>  |
| <b>1.4 Isosurfaces of Molecular Orbitals .....</b>                       | <b>4</b>  |
| <b>1.5 Natural Transition Orbital (NTO) Couples.....</b>                 | <b>8</b>  |
| <b>1.6 UV-Vis Absorption Spectra.....</b>                                | <b>9</b>  |
| <b>2. Calculation Result.....</b>                                        | <b>10</b> |
| <b>2.1 Key Geometrical Parameters.....</b>                               | <b>10</b> |
| <b>2.2 Geometric Structures in Cartesian.....</b>                        | <b>10</b> |
| <b>2.3 Frequency Calculation.....</b>                                    | <b>65</b> |
| <b>2.4 Full CDA Results.....</b>                                         | <b>71</b> |
| <b>2.5 Calculated Fluorescence Emission Rates.....</b>                   | <b>85</b> |
| <b>2.6 Calculated Phosphorescence Lifetime.....</b>                      | <b>85</b> |
| <b>2.7 Calculated Excitation Energies and Oscillator Strengths .....</b> | <b>85</b> |
| <b>3. References.....</b>                                                | <b>89</b> |

## 1. Supplemental Figures

### 1.1 Comparison of Structures with RMSD Value

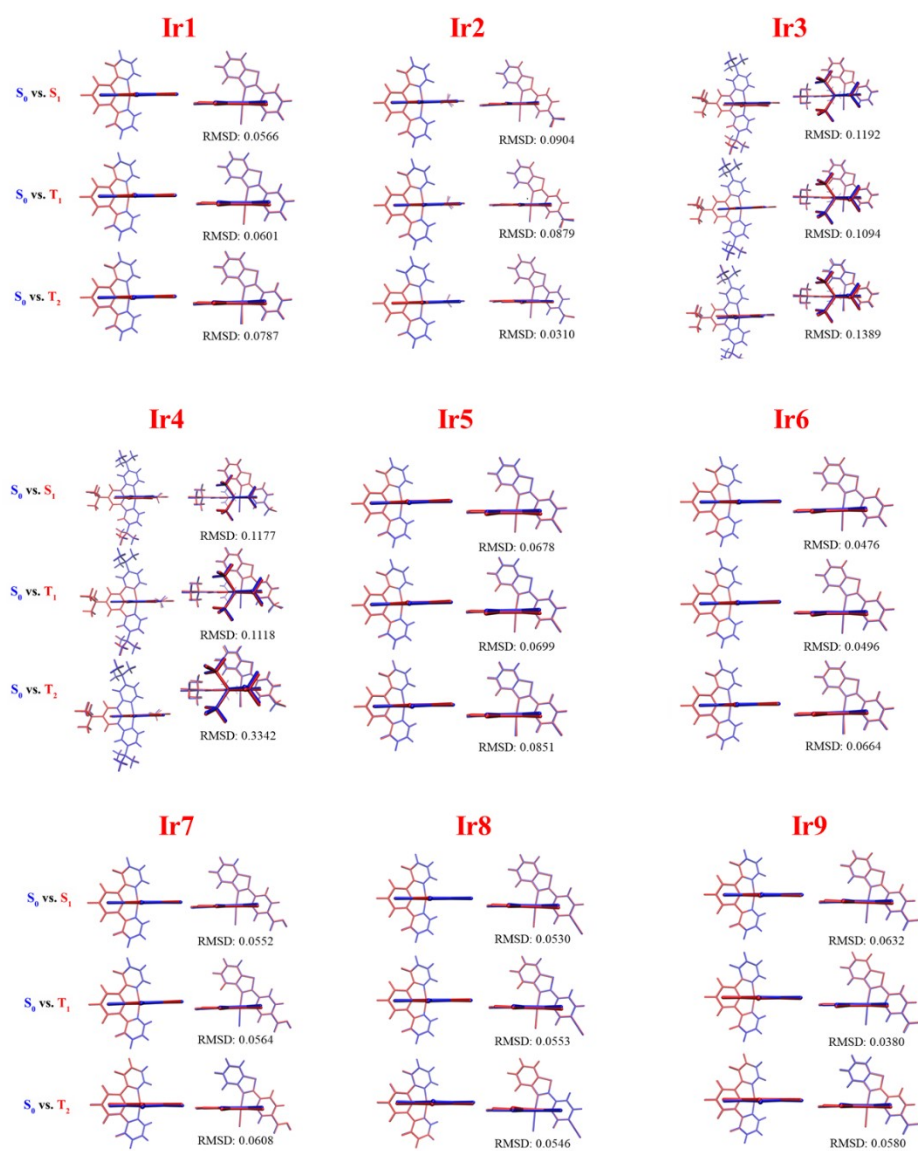

**Figure S1.** Comparison of Ir1-Ir9 structures of ground state (blue) and excited states (red) with RMSD of total structure.

## 1.2 Isosurfaces of Fragment or Complex Orbitals

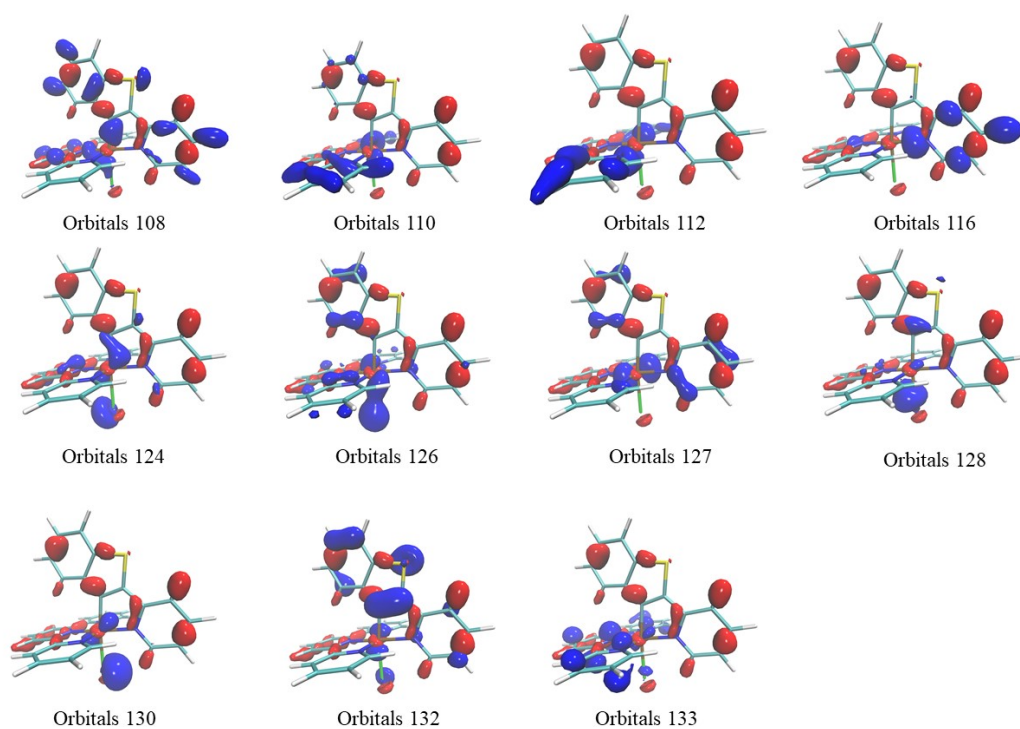

**Figure S2.** Complex orbitals of Ir1

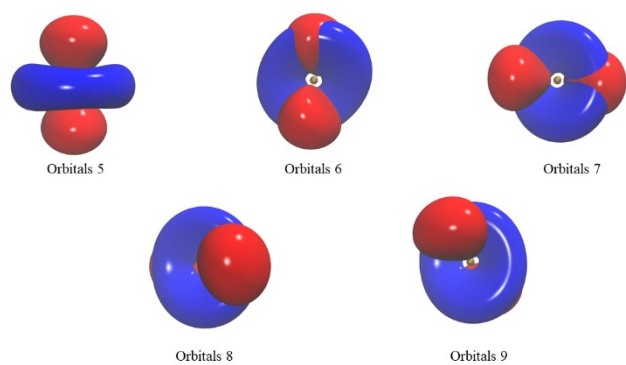

**Figure S3.** Fragment orbitals of F1 in Ir1

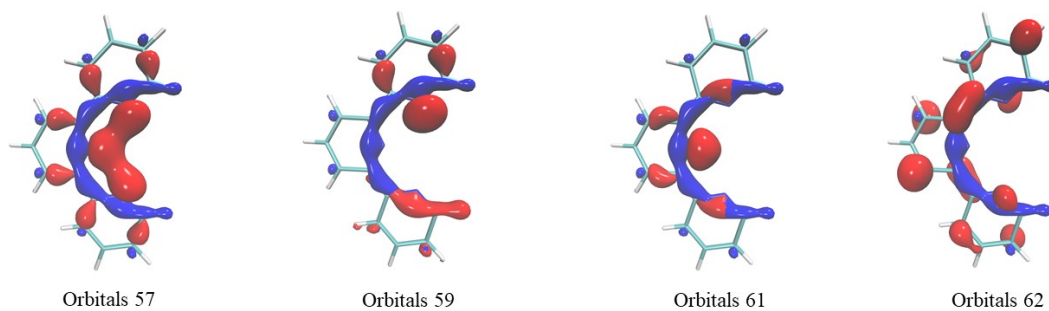

**Figure S4.** Fragment orbitals of F2 in Ir1

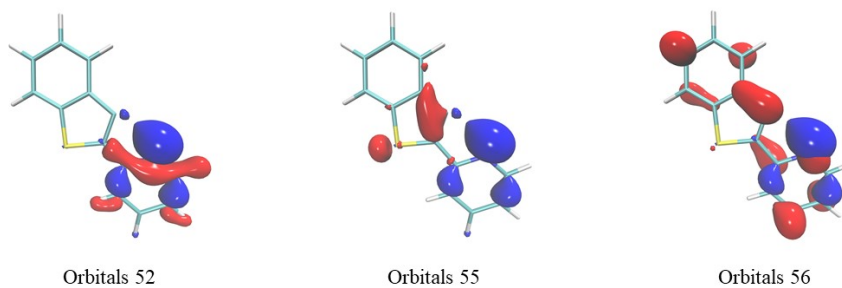

**Figure S5.** Fragment orbitals of F3 in Ir1

### 1.3 Density of States of Ir1

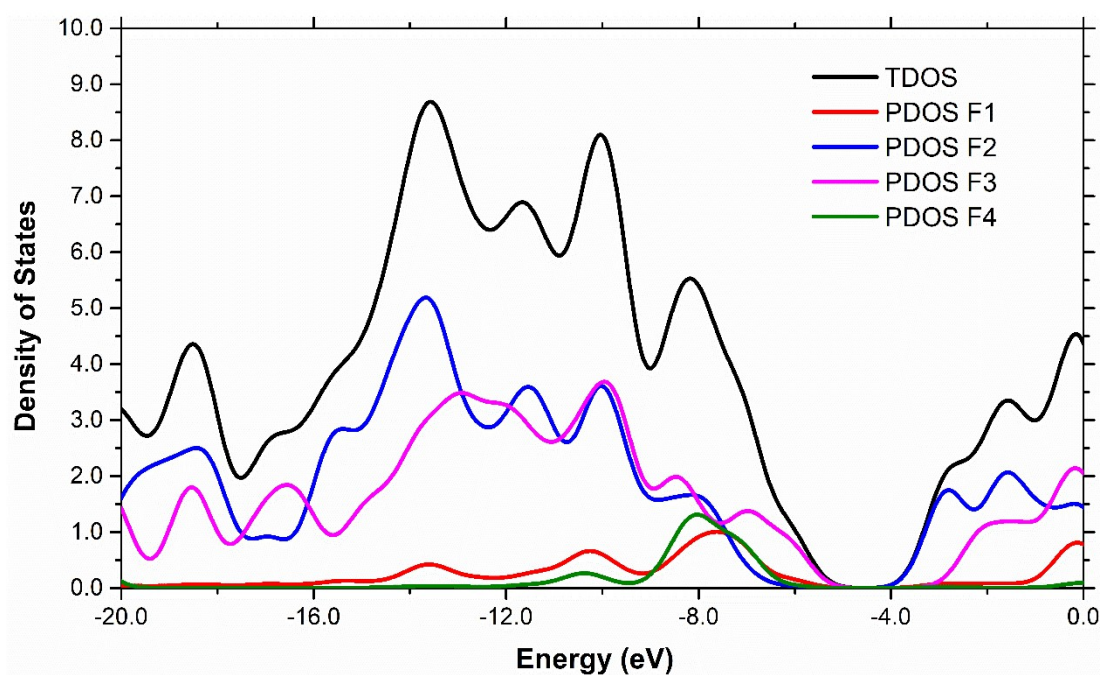

**Figure S6.** Total Density of States (TDOS) and Partial Density of States (PDOS) of Ir1. F1 stands for  $\text{Ir}^{3+}$ , F2 stands for tpy ligand, F3 stands for btp ligand and F4 stands for Cl.

### 1.4 Isosurfaces of Molecular Orbitals

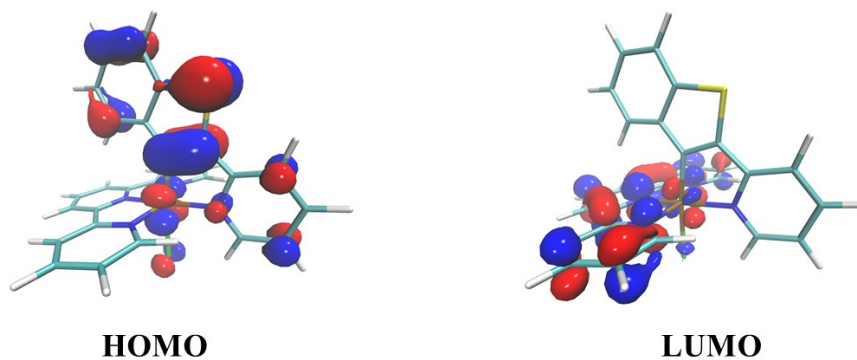

**Figure S7.** Molecular orbitals of **Ir1**: HOMO and LUMO

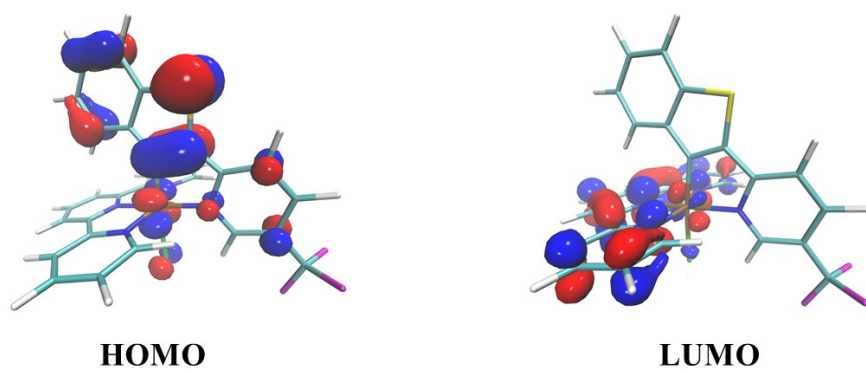

**Figure S8.** Molecular orbitals of **Ir2**: HOMO and LUMO

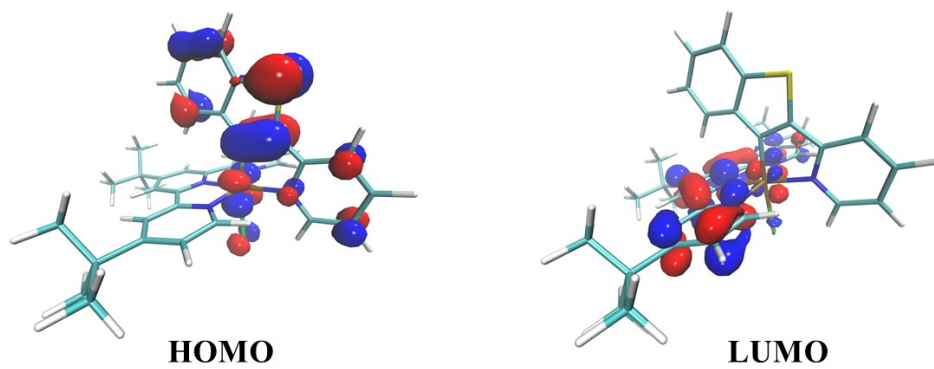

**Figure S9.** Molecular orbitals of **Ir3**: HOMO and LUMO

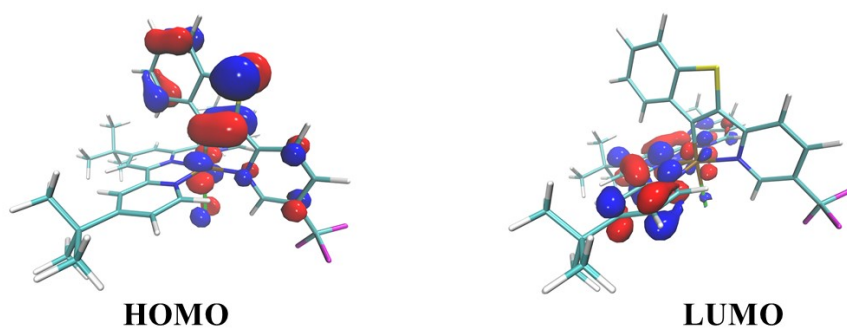

**Figure S10.** Molecular orbitals of **Ir4**: HOMO and LUMO

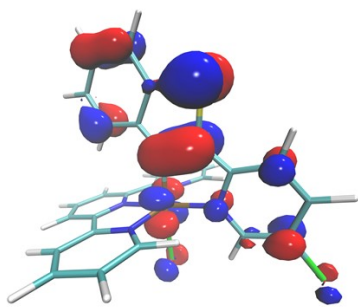

**HOMO**

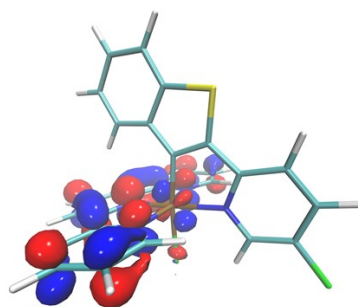

**LUMO**

**Figure S11.** Molecular orbitals of **Ir5**: HOMO and LUMO

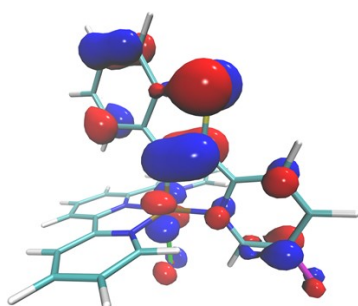

**HOMO**

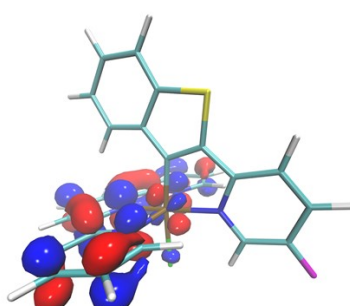

**LUMO**

**Figure S12.** Molecular orbitals of **Ir6**: HOMO and LUMO

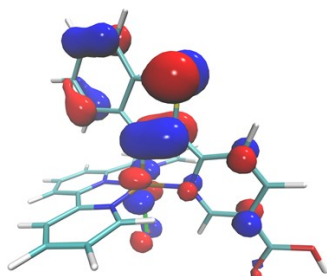

**HOMO**

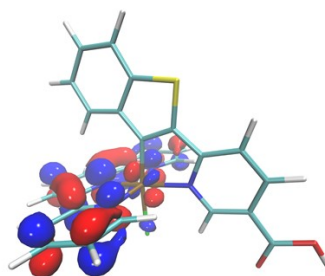

**LUMO**

**Figure S13.** Molecular orbitals of **Ir7**: HOMO and LUMO



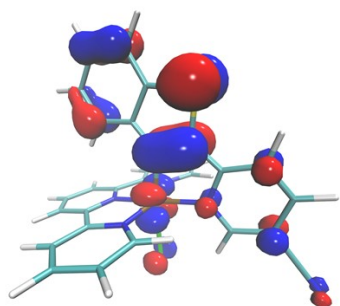

**HOMO**

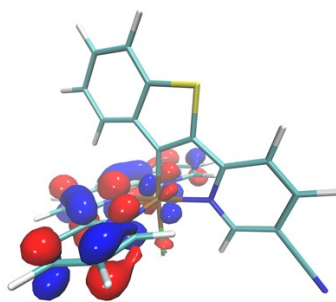

**LUMO**

**Figure S14.** Molecular orbitals of **Ir8**: HOMO and LUMO

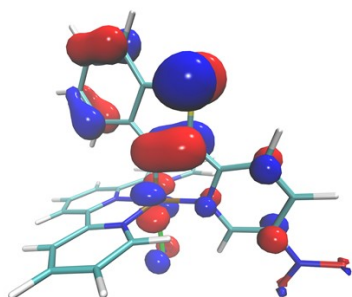

**HOMO**

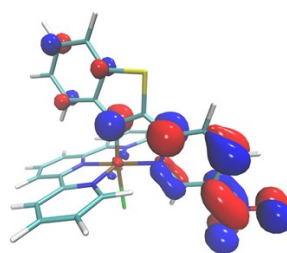

**LUMO**

**Figure S15.** Molecular orbitals of **Ir9**: HOMO and LUMO



## 1.5 Natural Transition Orbital (NTO) Couples

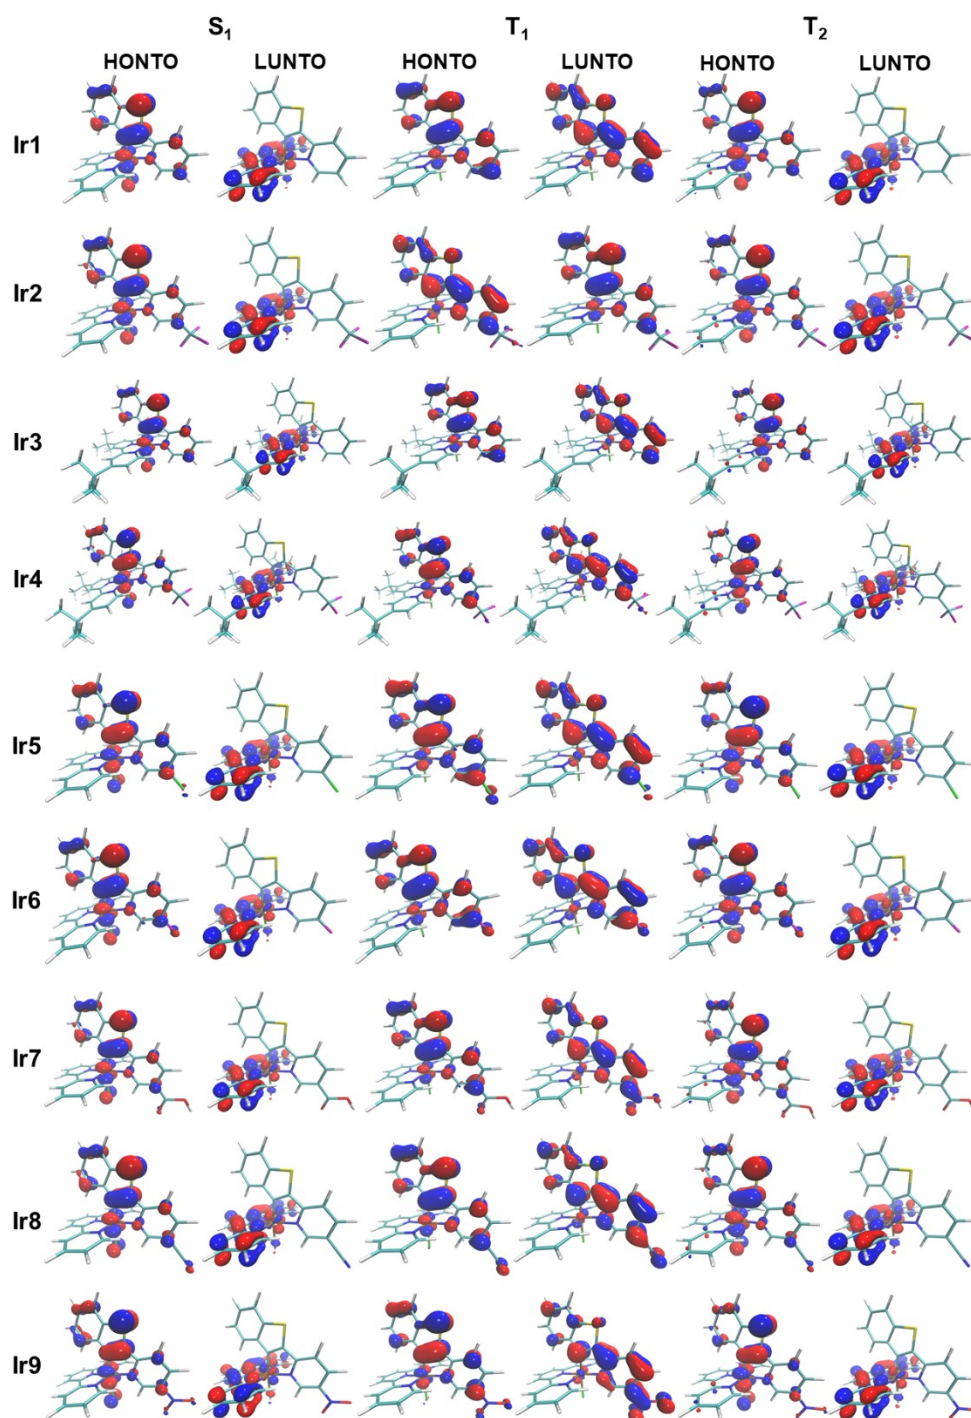

**Figure S16.** The ground state structure-based natural transition orbital couples related to excitation features of the  $S_1$ ,  $T_1$  and  $T_2$  states in this work.

## 1.6 UV-Vis Absorption Spectra.

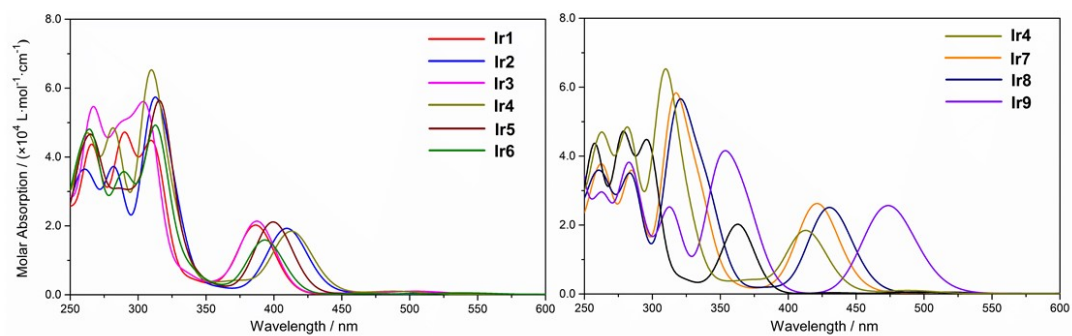

**Figure S17.** UV-Vis spectra of Ir1-Ir9 calculated by TD-DFT method combined with IEFPCM model in acetonitrile. The damping constant of the Lorentzian linewidth function in our work is taken to be 0.25 eV.

## 2. Calculation Result

### 2.1 Key Geometrical Parameters

**Table S1.** Calculated bond lengths and dihedral angles of Ir1~Ir9 in their S<sub>0</sub>, S<sub>1</sub>, T<sub>1</sub> and T<sub>2</sub> optimized structure. (in angstrom and degree)

| Mol.           | Ir1            |                |                |                | Ir2            |                |                |                | Ir3            |                |                |                |
|----------------|----------------|----------------|----------------|----------------|----------------|----------------|----------------|----------------|----------------|----------------|----------------|----------------|
| States         | S <sub>0</sub> | S <sub>1</sub> | T <sub>1</sub> | T <sub>2</sub> | S <sub>0</sub> | S <sub>1</sub> | T <sub>1</sub> | T <sub>2</sub> | S <sub>0</sub> | S <sub>1</sub> | T <sub>1</sub> | T <sub>2</sub> |
| L <sub>1</sub> | 2.0161         | 1.9520         | 1.9493         | 2.0214         | 2.0141         | 1.9513         | 1.9489         | 1.9966         | 2.0144         | 1.9520         | 1.9506         | 2.0179         |
| L <sub>2</sub> | 2.0921         | 2.1003         | 2.1043         | 2.1459         | 2.0912         | 2.1001         | 2.1044         | 2.0881         | 2.0917         | 2.0999         | 2.1038         | 2.1413         |
| L <sub>3</sub> | 1.4408         | 1.4421         | 1.4411         | 1.4406         | 1.4354         | 1.4420         | 1.4411         | 1.3974         | 1.4408         | 1.4421         | 1.4413         | 1.4408         |
| D <sub>1</sub> | 0.0000         | 0.0000         | 0.1487         | 0.0229         | 0.0124         | 0.1473         | 0.0838         | 0.1422         | 0.1338         | 1.9250         | 0.1862         | 4.0197         |
| D <sub>2</sub> | 0.0000         | 0.0000         | 0.0197         | 0.0069         | 0.0310         | 0.1678         | 0.1297         | 0.0515         | 0.0193         | 0.0639         | 0.1211         | 0.8534         |
| D <sub>3</sub> | 0.0000         | 0.0000         | 0.0131         | 0.0010         | 0.0283         | 0.0409         | 0.0264         | 0.1361         | 0.0027         | 0.5780         | 0.2980         | 0.2381         |
| Mol.           | Ir4            |                |                |                | Ir5            |                |                |                | Ir6            |                |                |                |
| States         | S <sub>0</sub> | S <sub>1</sub> | T <sub>1</sub> | T <sub>2</sub> | S <sub>0</sub> | S <sub>1</sub> | T <sub>1</sub> | T <sub>2</sub> | S <sub>0</sub> | S <sub>1</sub> | T <sub>1</sub> | T <sub>2</sub> |
| L <sub>1</sub> | 2.0122         | 1.9514         | 1.9505         | 1.9826         | 2.0158         | 1.9527         | 1.9499         | 2.0216         | 2.0175         | 1.9529         | 1.9500         | 2.0215         |
| L <sub>2</sub> | 2.0903         | 2.0996         | 2.1032         | 2.1142         | 2.0918         | 2.1008         | 2.1051         | 2.1479         | 2.0915         | 2.0993         | 2.1037         | 2.1472         |
| L <sub>3</sub> | 1.4356         | 1.4419         | 1.4412         | 1.4396         | 1.4387         | 1.4391         | 1.4382         | 1.4384         | 1.4409         | 1.4399         | 1.4391         | 1.4408         |
| D <sub>1</sub> | 0.2606         | 1.7008         | 0.0552         | 0.8002         | 0.4012         | 0.0399         | 0.3299         | 0.0016         | 0.0153         | 0.0114         | 0.0185         | 0.0015         |
| D <sub>2</sub> | 0.1539         | 0.0101         | 0.2598         | 0.1034         | 0.0403         | 0.0248         | 0.2281         | 0.0020         | 0.0156         | 0.0014         | 0.0146         | 0.0011         |
| D <sub>3</sub> | 0.0074         | 0.4529         | 0.0677         | 0.0520         | 0.1890         | 0.0072         | 0.0291         | 0.0009         | 0.0013         | 0.0104         | 0.0034         | 0.0005         |
| Mol.           | Ir7            |                |                |                | Ir8            |                |                |                | Ir9            |                |                |                |
| States         | S <sub>0</sub> | S <sub>1</sub> | T <sub>1</sub> | T <sub>2</sub> | S <sub>0</sub> | S <sub>1</sub> | T <sub>1</sub> | T <sub>2</sub> | S <sub>0</sub> | S <sub>1</sub> | T <sub>1</sub> | T <sub>2</sub> |
| L <sub>1</sub> | 2.0140         | 1.9515         | 1.9493         | 1.9561         | 2.0130         | 1.9513         | 1.9491         | 1.9561         | 2.0112         | 1.9510         | 1.9846         | 1.9571         |
| L <sub>2</sub> | 2.0915         | 2.1005         | 2.1046         | 2.1005         | 2.0927         | 2.1021         | 2.1065         | 2.1024         | 2.0906         | 2.1002         | 2.0885         | 2.1000         |
| L <sub>3</sub> | 1.4342         | 1.4407         | 1.4398         | 1.4409         | 1.4318         | 1.4398         | 1.4389         | 1.4401         | 1.4297         | 1.4401         | 1.4088         | 1.4400         |
| D <sub>1</sub> | 0.0131         | 0.0192         | 0.1117         | 1.7061         | 0.0064         | 0.0076         | 0.1017         | 1.8034         | 0.2082         | 0.0143         | 0.0087         | 1.7472         |
| D <sub>2</sub> | 0.0007         | 0.0068         | 0.0774         | 0.5605         | 0.0080         | 0.0093         | 0.1408         | 0.4808         | 0.0969         | 0.0062         | 0.0017         | 0.5928         |
| D <sub>3</sub> | 0.0060         | 0.0013         | 0.0039         | 0.1221         | 0.0027         | 0.0111         | 0.0031         | 0.1010         | 0.0719         | 0.0003         | 0.0026         | 0.0013         |

### 2.2 Geometric Structures in Cartesian

Structure of Ir1, S<sub>0</sub> state

|   |             |             |            |
|---|-------------|-------------|------------|
| C | -0.46678200 | -1.98841700 | 3.66376700 |
| C | -0.53008000 | -1.57976500 | 2.33598500 |
| C | -0.74314800 | 0.65448700  | 2.98942800 |
| C | -0.68498900 | 0.30568900  | 4.33455700 |
| C | -0.54697400 | -1.03538600 | 4.67615100 |
| H | -0.35225600 | -3.04504800 | 3.90491800 |
| H | -0.84955200 | 1.69223100  | 2.66963100 |
| H | -0.74727900 | 1.08557500  | 5.09430000 |
| H | -0.49822500 | -1.34231100 | 5.72240400 |

|    |             |             |             |
|----|-------------|-------------|-------------|
| C  | -0.44203800 | -2.50062600 | 1.18770300  |
| C  | -0.32583000 | -3.88938300 | 1.21317900  |
| C  | -0.26139200 | -4.57472900 | 0.00000000  |
| H  | -0.28911500 | -4.43136400 | 2.15789100  |
| C  | -0.44203800 | -2.50062600 | -1.18770300 |
| C  | -0.32583000 | -3.88938300 | -1.21317900 |
| H  | -0.16783500 | -5.66181400 | 0.00000000  |
| H  | -0.28911500 | -4.43136400 | -2.15789100 |
| C  | -0.53008000 | -1.57976500 | -2.33598500 |
| C  | -0.46678200 | -1.98841700 | -3.66376700 |
| C  | -0.74314800 | 0.65448700  | -2.98942800 |
| C  | -0.54697400 | -1.03538600 | -4.67615100 |
| H  | -0.35225600 | -3.04504800 | -3.90491800 |
| C  | -0.68498900 | 0.30568900  | -4.33455700 |
| H  | -0.84955200 | 1.69223100  | -2.66963100 |
| H  | -0.49822500 | -1.34231100 | -5.72240400 |
| H  | -0.74727900 | 1.08557500  | -5.09430000 |
| N  | -0.67370000 | -0.26048500 | 2.01980800  |
| N  | -0.47445500 | -1.87245400 | 0.00000000  |
| N  | -0.67370000 | -0.26048500 | -2.01980800 |
| Ir | -0.73215300 | 0.06616800  | 0.00000000  |
| Cl | -3.14582400 | -0.41235700 | 0.00000000  |
| C  | 1.19407100  | 0.66153700  | 0.00000000  |
| C  | 2.47897900  | 0.00897400  | 0.00000000  |
| C  | 1.34213800  | 2.03321300  | 0.00000000  |
| C  | 3.55340900  | 0.94256400  | 0.00000000  |
| C  | 2.79748600  | -1.36422000 | 0.00000000  |
| S  | 2.99611100  | 2.59092800  | 0.00000000  |
| C  | 0.16613600  | 2.86554200  | 0.00000000  |
| C  | 4.89061300  | 0.53254000  | 0.00000000  |
| C  | 4.12183300  | -1.77216800 | 0.00000000  |
| H  | 2.00309100  | -2.10924800 | 0.00000000  |
| C  | 0.13063200  | 4.26424100  | 0.00000000  |
| N  | -0.98901800 | 2.14241200  | 0.00000000  |
| C  | 5.16459800  | -0.82882000 | 0.00000000  |
| H  | 5.69974700  | 1.26610600  | 0.00000000  |
| H  | 4.35832000  | -2.83857000 | 0.00000000  |
| C  | -1.09689400 | 4.91171600  | 0.00000000  |
| H  | 1.06571600  | 4.82688500  | 0.00000000  |
| C  | -2.17343200 | 2.77103200  | 0.00000000  |
| H  | 6.20311400  | -1.16819000 | 0.00000000  |
| C  | -2.27054600 | 4.15508200  | 0.00000000  |
| H  | -1.14060000 | 6.00293000  | 0.00000000  |
| H  | -3.04907000 | 2.11705000  | 0.00000000  |

|   |             |            |            |
|---|-------------|------------|------------|
| H | -3.25417000 | 4.62582200 | 0.00000000 |
|---|-------------|------------|------------|

Structure of Ir1, S<sub>1</sub> state

|    |             |             |             |
|----|-------------|-------------|-------------|
| C  | -1.98243000 | -0.45302200 | -3.68390400 |
| C  | -1.58896000 | -0.51619500 | -2.33797700 |
| C  | 0.65512800  | -0.80406300 | -3.00636700 |
| C  | 0.31292400  | -0.75259600 | -4.34325800 |
| C  | -1.03902800 | -0.57233900 | -4.68674600 |
| H  | -3.03540100 | -0.30841000 | -3.92735000 |
| H  | 1.69020900  | -0.93944800 | -2.68761400 |
| H  | 1.08820600  | -0.85194700 | -5.10324000 |
| H  | -1.34316300 | -0.52519100 | -5.73400500 |
| C  | -2.48928300 | -0.40199100 | -1.20858700 |
| C  | -3.87232700 | -0.25622200 | -1.21876300 |
| C  | -4.55867500 | -0.17204500 | -0.00000100 |
| H  | -4.41919700 | -0.21505800 | -2.16120100 |
| C  | -2.48928300 | -0.40199000 | 1.20858600  |
| C  | -3.87232700 | -0.25622200 | 1.21876200  |
| H  | -5.64325300 | -0.05754000 | -0.00000100 |
| H  | -4.41919700 | -0.21505700 | 2.16120000  |
| C  | -1.58896000 | -0.51619400 | 2.33797600  |
| C  | -1.98242900 | -0.45302000 | 3.68390300  |
| C  | 0.65512800  | -0.80406300 | 3.00636600  |
| C  | -1.03902800 | -0.57233700 | 4.68674500  |
| H  | -3.03540000 | -0.30840800 | 3.92734900  |
| C  | 0.31292400  | -0.75259500 | 4.34325700  |
| H  | 1.69020900  | -0.93944800 | 2.68761300  |
| H  | -1.34316300 | -0.52518900 | 5.73400400  |
| H  | 1.08820600  | -0.85194600 | 5.10323900  |
| N  | -0.25632600 | -0.69397600 | -2.02629200 |
| N  | -1.85551100 | -0.42960000 | -0.00000100 |
| N  | -0.25632600 | -0.69397600 | 2.02629100  |
| Ir | 0.08135900  | -0.70781000 | -0.00000100 |
| Cl | -0.39237200 | -3.11598500 | 0.00000000  |
| C  | 0.62473800  | 1.16702300  | -0.00000100 |
| C  | -0.03102200 | 2.45103300  | 0.00000000  |
| C  | 2.03749200  | 1.34627700  | 0.00000000  |
| C  | 0.89163500  | 3.52756200  | 0.00000100  |
| C  | -1.40343700 | 2.75593200  | 0.00000100  |
| S  | 2.55584600  | 2.97123000  | 0.00000000  |
| C  | 2.88321400  | 0.17821400  | 0.00000000  |
| C  | 0.49172500  | 4.85637600  | 0.00000200  |
| C  | -1.81619100 | 4.08535800  | 0.00000200  |
| H  | -2.13875700 | 1.95423100  | 0.00000100  |

|   |             |             |             |
|---|-------------|-------------|-------------|
| C | 4.27914100  | 0.16480600  | 0.00000100  |
| N | 2.16415000  | -0.97806500 | 0.00000000  |
| C | -0.88101800 | 5.12446700  | 0.00000200  |
| H | 1.22046600  | 5.66877500  | 0.00000200  |
| H | -2.88289700 | 4.31689800  | 0.00000200  |
| C | 4.93882600  | -1.05938400 | 0.00000000  |
| H | 4.83427300  | 1.10426300  | 0.00000100  |
| C | 2.79832300  | -2.15227700 | 0.00000000  |
| H | -1.22114400 | 6.16218200  | 0.00000300  |
| C | 4.18952600  | -2.23349000 | 0.00000000  |
| H | 6.02973400  | -1.09497900 | 0.00000100  |
| H | 2.15354800  | -3.03504700 | -0.00000100 |
| H | 4.66803300  | -3.21347100 | 0.00000000  |

Structure of Ir1, T<sub>1</sub> state

|   |             |             |             |
|---|-------------|-------------|-------------|
| C | -1.97746500 | -0.45332000 | -3.68159500 |
| C | -1.58976500 | -0.50840000 | -2.33032600 |
| C | 0.66031600  | -0.80242300 | -2.99456300 |
| C | 0.32172700  | -0.76053200 | -4.33110100 |
| C | -1.03224700 | -0.58054100 | -4.67873400 |
| H | -3.02959100 | -0.30916000 | -3.92943700 |
| H | 1.69457000  | -0.93599900 | -2.67203500 |
| H | 1.09826900  | -0.86575300 | -5.08902000 |
| H | -1.33329600 | -0.54009200 | -5.72733500 |
| C | -2.48835600 | -0.39096400 | -1.20847600 |
| C | -3.87598900 | -0.24825100 | -1.21486800 |
| C | -4.56368600 | -0.17062000 | -0.00150800 |
| H | -4.42179100 | -0.20691200 | -2.15831500 |
| C | -2.49689700 | -0.39989200 | 1.21036900  |
| C | -3.87673800 | -0.26054500 | 1.22259800  |
| H | -5.64877200 | -0.05946100 | -0.00260000 |
| H | -4.42469700 | -0.22980900 | 2.16474400  |
| C | -1.59577600 | -0.52397400 | 2.34372100  |
| C | -1.99377900 | -0.48062900 | 3.68696000  |
| C | 0.64577600  | -0.81564700 | 3.01121900  |
| C | -1.05096800 | -0.61260800 | 4.69078400  |
| H | -3.04769600 | -0.34286000 | 3.92977500  |
| C | 0.29971600  | -0.78465600 | 4.34838700  |
| H | 1.68148800  | -0.94418800 | 2.69196000  |
| H | -1.35759200 | -0.58167100 | 5.73800800  |
| H | 1.07347100  | -0.89303000 | 5.10885500  |
| N | -0.25394300 | -0.68499100 | -2.01595000 |
| N | -1.85625800 | -0.41482800 | 0.00621700  |
| N | -0.26556700 | -0.69235800 | 2.03262100  |

|    |             |             |            |
|----|-------------|-------------|------------|
| Ir | 0.07967600  | -0.69035500 | 0.00508200 |
| Cl | -0.39000200 | -3.10122700 | 0.00671600 |
| C  | 0.62977200  | 1.17970300  | 0.00822900 |
| C  | -0.02579400 | 2.46383100  | 0.00816100 |
| C  | 2.04314800  | 1.35603200  | 0.00953600 |
| C  | 0.89864900  | 3.53911200  | 0.01042000 |
| C  | -1.39839900 | 2.76824100  | 0.00525900 |
| S  | 2.56402500  | 2.98287500  | 0.01159100 |
| C  | 2.88649100  | 0.18751700  | 0.00779000 |
| C  | 0.49792000  | 4.86848900  | 0.01067100 |
| C  | -1.81047200 | 4.09652300  | 0.00551500 |
| H  | -2.13281100 | 1.96500700  | 0.00229700 |
| C  | 4.28283100  | 0.17133800  | 0.00820500 |
| N  | 2.16557400  | -0.96807900 | 0.00529800 |
| C  | -0.87367800 | 5.13594900  | 0.00836500 |
| H  | 1.22661800  | 5.68104700  | 0.01237500 |
| H  | -2.87704600 | 4.32920600  | 0.00325700 |
| C  | 4.93984600  | -1.05440000 | 0.00617800 |
| H  | 4.83975700  | 1.10975300  | 0.01002100 |
| C  | 2.79709900  | -2.14343500 | 0.00355400 |
| H  | -1.21406500 | 6.17378200  | 0.00847300 |
| C  | 4.18839300  | -2.22724600 | 0.00390800 |
| H  | 6.03074600  | -1.09219900 | 0.00635400 |
| H  | 2.15073600  | -3.02510200 | 0.00174500 |
| H  | 4.66497200  | -3.20822000 | 0.00224300 |

Structure of Ir1, T<sub>2</sub> state

|   |             |             |             |
|---|-------------|-------------|-------------|
| C | -1.98628800 | -0.45950800 | -3.70011300 |
| C | -1.59799400 | -0.52195800 | -2.35273200 |
| C | 0.64426600  | -0.82522500 | -2.99262000 |
| C | 0.31077100  | -0.77162400 | -4.34012100 |
| C | -1.03019600 | -0.58690000 | -4.69439400 |
| H | -3.03588000 | -0.30834700 | -3.95257700 |
| H | 1.67556900  | -0.96610000 | -2.66445400 |
| H | 1.09335900  | -0.87381900 | -5.09218900 |
| H | -1.32416400 | -0.54008800 | -5.74458600 |
| C | -2.49687300 | -0.39248800 | -1.22957400 |
| C | -3.87380200 | -0.22158500 | -1.22866900 |
| C | -4.56030800 | -0.12473800 | 0.00281500  |
| H | -4.42536100 | -0.16719200 | -2.16732800 |
| C | -2.49525100 | -0.38685400 | 1.23382500  |
| C | -3.87207100 | -0.21603500 | 1.23391100  |
| H | -5.64212200 | 0.01089900  | 0.00324800  |
| H | -4.42246600 | -0.15740800 | 2.17300700  |



|    |             |             |             |
|----|-------------|-------------|-------------|
| C  | -1.59480900 | -0.51102200 | 2.35652500  |
| C  | -1.98130500 | -0.44233600 | 3.70402200  |
| C  | 0.64824300  | -0.81122200 | 2.99482200  |
| C  | -1.02391900 | -0.56525800 | 4.69763200  |
| H  | -3.03054200 | -0.28994600 | 3.95722300  |
| C  | 0.31661600  | -0.75159300 | 4.34242500  |
| H  | 1.67908800  | -0.95341400 | 2.66576000  |
| H  | -1.31651000 | -0.51365600 | 5.74798200  |
| H  | 1.10016600  | -0.85034000 | 5.09395000  |
| N  | -0.27443600 | -0.71193300 | -2.03104100 |
| N  | -1.84324200 | -0.44264700 | 0.00197600  |
| N  | -0.27185200 | -0.70231800 | 2.03397300  |
| Ir | 0.02984900  | -0.75225900 | 0.00127200  |
| Cl | -0.25599000 | -3.16117500 | 0.00739600  |
| C  | 0.65123000  | 1.17125900  | -0.00340200 |
| C  | -0.02895100 | 2.44171300  | -0.00526900 |
| C  | 2.01665900  | 1.33216200  | -0.00490700 |
| C  | 0.89412900  | 3.52548700  | -0.00811600 |
| C  | -1.40470200 | 2.74482800  | -0.00469800 |
| S  | 2.54870300  | 2.99056200  | -0.00851000 |
| C  | 2.86480600  | 0.16775200  | -0.00326900 |
| C  | 0.46973700  | 4.85810900  | -0.01026600 |
| C  | -1.82544200 | 4.06457900  | -0.00681300 |
| H  | -2.14092800 | 1.94310900  | -0.00266600 |
| C  | 4.26261100  | 0.16525800  | -0.00439600 |
| N  | 2.16167900  | -0.99757200 | -0.00027000 |
| C  | -0.89376700 | 5.11763900  | -0.00957100 |
| H  | 1.19562000  | 5.67396700  | -0.01243300 |
| H  | -2.89436300 | 4.28864800  | -0.00633700 |
| C  | 4.93780100  | -1.04702900 | -0.00244400 |
| H  | 4.80286900  | 1.11330200  | -0.00680900 |
| C  | 2.81942000  | -2.16668800 | 0.00156900  |
| H  | -1.24431200 | 6.15230500  | -0.01117900 |
| C  | 4.20504500  | -2.23433000 | 0.00058200  |
| H  | 6.02956000  | -1.06741000 | -0.00326900 |
| H  | 2.19445000  | -3.06164300 | 0.00390100  |
| H  | 4.69406300  | -3.20888900 | 0.00220300  |

#### Structure of Ir<sub>2</sub>, S<sub>0</sub> state

|   |             |             |            |
|---|-------------|-------------|------------|
| C | 1.96580600  | -1.44891400 | 3.66391400 |
| C | 1.59413000  | -1.27014300 | 2.33576200 |
| C | -0.39239000 | -0.22483800 | 2.98796000 |
| C | -0.07336700 | -0.37403000 | 4.33340100 |
| C | 1.12215100  | -0.99664300 | 4.67557200 |

|    |             |             |             |
|----|-------------|-------------|-------------|
| H  | 2.91013800  | -1.93586000 | 3.90708100  |
| H  | -1.31796700 | 0.25598100  | 2.66819000  |
| H  | -0.76212000 | -0.00207600 | 5.09266900  |
| H  | 1.40218400  | -1.12940000 | 5.72206300  |
| C  | 2.41466000  | -1.69740600 | 1.18775400  |
| C  | 3.63982600  | -2.36121400 | 1.21410500  |
| C  | 4.25135000  | -2.67990700 | 0.00174600  |
| H  | 4.11148500  | -2.62921800 | 2.15901300  |
| C  | 2.41977400  | -1.69212000 | -1.18782100 |
| C  | 3.64501100  | -2.35589800 | -1.21181100 |
| H  | 5.21230000  | -3.19671300 | 0.00266700  |
| H  | 4.12065100  | -2.61988200 | -2.15584800 |
| C  | 1.60419500  | -1.25978200 | -2.33747700 |
| C  | 1.98155700  | -1.43278300 | -3.66479800 |
| C  | -0.37965200 | -0.21187800 | -2.99363300 |
| C  | 1.14210000  | -0.97636700 | -4.67808800 |
| H  | 2.92701200  | -1.91851100 | -3.90603400 |
| C  | -0.05495700 | -0.35539000 | -4.33833600 |
| H  | -1.30663200 | 0.26751200  | -2.67578100 |
| H  | 1.42654900  | -1.10467900 | -5.72394200 |
| H  | -0.74057500 | 0.01962800  | -5.09893000 |
| N  | 0.41418700  | -0.66328900 | 2.01891600  |
| N  | 1.87435700  | -1.37679300 | -0.00049600 |
| N  | 0.42287700  | -0.65433500 | -2.02305100 |
| Ir | 0.11497800  | -0.52334900 | -0.00239500 |
| Cl | -0.82848400 | -2.79210300 | -0.00970900 |
| C  | 0.67780700  | 1.41046200  | 0.00319700  |
| C  | 1.92867400  | 2.12361100  | 0.00774500  |
| C  | -0.38656700 | 2.29320300  | 0.00242900  |
| C  | 1.74123700  | 3.53470800  | 0.01020800  |
| C  | 3.24977400  | 1.63107100  | 0.00986000  |
| S  | 0.05987000  | 3.98069500  | 0.00707200  |
| C  | -1.72352600 | 1.77076700  | -0.00210800 |
| C  | 2.82089300  | 4.42403700  | 0.01459300  |
| C  | 4.31982100  | 2.51059600  | 0.01418200  |
| H  | 3.43250100  | 0.55755000  | 0.00807700  |
| C  | -2.91449400 | 2.51126700  | -0.00608700 |
| N  | -1.75761900 | 0.40757600  | -0.00456000 |
| C  | 4.10693800  | 3.90092200  | 0.01652800  |
| H  | 2.65546700  | 5.50350800  | 0.01639100  |
| H  | 5.33995000  | 2.12043700  | 0.01575800  |
| C  | -4.12662300 | 1.84657700  | -0.01159900 |
| H  | -2.87277700 | 3.60128000  | -0.00668100 |
| C  | -2.92958400 | -0.23697400 | -0.00926100 |

|   |             |             |             |
|---|-------------|-------------|-------------|
| H | 4.96282000  | 4.57995300  | 0.01988700  |
| C | -4.13582000 | 0.44597400  | -0.01219900 |
| H | -5.06262700 | 2.40921400  | -0.01851900 |
| H | -2.87006700 | -1.32840000 | -0.01281900 |
| C | -5.43694200 | -0.30231600 | -0.00067800 |
| F | -6.09505700 | -0.11693000 | 1.14965900  |
| F | -6.24513100 | 0.11772900  | -0.97980200 |
| F | -5.26010000 | -1.61518300 | -0.15462600 |

#### Structure of Ir2, S<sub>1</sub> state

|    |             |             |             |
|----|-------------|-------------|-------------|
| C  | 1.96521700  | -1.41654300 | 3.68728700  |
| C  | 1.60590800  | -1.25547200 | 2.33969500  |
| C  | -0.43230100 | -0.26739800 | 3.00081300  |
| C  | -0.12223300 | -0.41035800 | 4.33861600  |
| C  | 1.10709800  | -0.99886200 | 4.68656700  |
| H  | 2.92433500  | -1.87218300 | 3.93527300  |
| H  | -1.37215400 | 0.18458900  | 2.67944600  |
| H  | -0.82831000 | -0.06910400 | 5.09587200  |
| H  | 1.38401400  | -1.12472700 | 5.73485300  |
| C  | 2.42379800  | -1.65508100 | 1.21359800  |
| C  | 3.66074700  | -2.29111000 | 1.22749800  |
| C  | 4.28394700  | -2.59970500 | 0.01156800  |
| H  | 4.13846000  | -2.55416800 | 2.17158500  |
| C  | 2.43064700  | -1.65993100 | -1.20411000 |
| C  | 3.66691400  | -2.29605400 | -1.20961100 |
| H  | 5.25364400  | -3.09872700 | 0.01513900  |
| H  | 4.14926800  | -2.56340900 | -2.15007700 |
| C  | 1.61826800  | -1.26489000 | -2.33692500 |
| C  | 1.98534600  | -1.43124900 | -3.68133900 |
| C  | -0.41724900 | -0.28254500 | -3.01273900 |
| C  | 1.13189600  | -1.01895700 | -4.68723100 |
| H  | 2.94645600  | -1.88654400 | -3.92211000 |
| C  | -0.09984600 | -0.43115600 | -4.34837000 |
| H  | -1.35965400 | 0.16905800  | -2.69834700 |
| H  | 1.41462300  | -1.14887200 | -5.73346500 |
| H  | -0.80250900 | -0.09452000 | -5.11086800 |
| N  | 0.39431300  | -0.67451400 | 2.02371900  |
| N  | 1.88166900  | -1.33323200 | 0.00227900  |
| N  | 0.40509200  | -0.68379200 | -2.02971100 |
| Ir | 0.11068600  | -0.50306100 | -0.00389400 |
| Cl | -0.82529600 | -2.76830700 | -0.00179800 |
| C  | 0.68487500  | 1.36181900  | -0.00596700 |
| C  | 1.93761100  | 2.07566100  | -0.00154600 |
| C  | -0.39725900 | 2.28761400  | -0.01369200 |

|   |             |             |             |
|---|-------------|-------------|-------------|
| C | 1.75643700  | 3.48171500  | -0.00662200 |
| C | 3.25195600  | 1.57800500  | 0.00683500  |
| S | 0.06103100  | 3.92903200  | -0.01636900 |
| C | -1.74523600 | 1.77540300  | -0.01674000 |
| C | 2.81925300  | 4.37441800  | -0.00374400 |
| C | 4.32609100  | 2.46408300  | 0.00979400  |
| H | 3.42782800  | 0.50444100  | 0.01109700  |
| C | -2.92189700 | 2.52777000  | -0.02853300 |
| N | -1.77814600 | 0.41480200  | -0.01059200 |
| C | 4.11408000  | 3.84566000  | 0.00455900  |
| H | 2.65434700  | 5.45322100  | -0.00766800 |
| H | 5.34495800  | 2.07265700  | 0.01632400  |
| C | -4.14173700 | 1.86675300  | -0.02883000 |
| H | -2.87666300 | 3.61763900  | -0.03979600 |
| C | -2.94747400 | -0.22360400 | -0.01046800 |
| H | 4.96765900  | 4.52668300  | 0.00698900  |
| C | -4.15331600 | 0.47197300  | -0.01603600 |
| H | -5.07567300 | 2.43135100  | -0.04488600 |
| H | -2.89408000 | -1.31600100 | -0.01078900 |
| C | -5.45470000 | -0.28506500 | 0.02836600  |
| F | -5.92710100 | -0.35249900 | 1.27591500  |
| F | -6.38424000 | 0.31409700  | -0.71647700 |
| F | -5.31037800 | -1.53360300 | -0.41433800 |

#### Structure of Ir2, T<sub>1</sub> state

|   |             |             |             |
|---|-------------|-------------|-------------|
| C | 1.94886000  | -1.47110300 | 3.67994600  |
| C | 1.60318700  | -1.28439400 | 2.33248400  |
| C | -0.44273300 | -0.30975700 | 2.99121600  |
| C | -0.14646700 | -0.47915000 | 4.32882600  |
| C | 1.07913600  | -1.07338300 | 4.67765200  |
| H | 2.90554400  | -1.93106200 | 3.92916400  |
| H | -1.37905000 | 0.14820500  | 2.66801900  |
| H | -0.86034200 | -0.15292200 | 5.08551100  |
| H | 1.34489800  | -1.21958100 | 5.72629600  |
| C | 2.43170600  | -1.66403800 | 1.20639600  |
| C | 3.66602100  | -2.30202300 | 1.21978100  |
| C | 4.29792100  | -2.59554300 | 0.00214200  |
| H | 4.13578800  | -2.58064700 | 2.16351900  |
| C | 2.45009900  | -1.63917400 | -1.21298500 |
| C | 3.68661600  | -2.27754300 | -1.21696800 |
| H | 5.26701500  | -3.09604500 | 0.00496700  |
| H | 4.17187000  | -2.53712000 | -2.15839300 |
| C | 1.64018700  | -1.23935800 | -2.34195200 |
| C | 2.00639200  | -1.39816700 | -3.68897000 |

|    |             |             |             |
|----|-------------|-------------|-------------|
| C  | -0.40012900 | -0.25774400 | -3.01439100 |
| C  | 1.15105500  | -0.98430500 | -4.69123900 |
| H  | 2.96851600  | -1.84991300 | -3.93254000 |
| C  | -0.08334200 | -0.40073700 | -4.34978500 |
| H  | -1.34324100 | 0.19041400  | -2.69711100 |
| H  | 1.43325100  | -1.10915000 | -5.73836600 |
| H  | -0.78695400 | -0.06303600 | -5.11099700 |
| N  | 0.39584800  | -0.69797800 | 2.01575000  |
| N  | 1.89721100  | -1.31932700 | -0.00324400 |
| N  | 0.42470900  | -0.66124900 | -2.03284500 |
| Ir | 0.12555500  | -0.49416500 | -0.00999400 |
| Cl | -0.80575100 | -2.76370700 | -0.03551300 |
| C  | 0.68346900  | 1.37306800  | 0.01199600  |
| C  | 1.93279800  | 2.09228400  | 0.03035600  |
| C  | -0.40494400 | 2.29169800  | 0.01006900  |
| C  | 1.74324800  | 3.49747100  | 0.04083900  |
| C  | 3.24913800  | 1.59960300  | 0.03837300  |
| S  | 0.04467800  | 3.93793100  | 0.02843600  |
| C  | -1.74898200 | 1.77194900  | -0.00533700 |
| C  | 2.80308700  | 4.39456100  | 0.05874100  |
| C  | 4.31812100  | 2.48951200  | 0.05627900  |
| H  | 3.42777600  | 0.52598300  | 0.03044600  |
| C  | -2.93058000 | 2.51739800  | -0.01355200 |
| N  | -1.77419900 | 0.41094200  | -0.01568600 |
| C  | 4.09884100  | 3.87131700  | 0.06640300  |
| H  | 2.63363400  | 5.47272300  | 0.06668800  |
| H  | 5.33918700  | 2.10352100  | 0.06244200  |
| C  | -4.14613600 | 1.84860700  | -0.02743800 |
| H  | -2.89197400 | 3.60759400  | -0.01158600 |
| C  | -2.93920400 | -0.23482200 | -0.02857000 |
| H  | 4.94972600  | 4.55586900  | 0.08044800  |
| C  | -4.14939700 | 0.45355700  | -0.03146500 |
| H  | -5.08350200 | 2.40771700  | -0.04101300 |
| H  | -2.87924800 | -1.32682100 | -0.04153100 |
| C  | -5.44667500 | -0.31119900 | -0.00274100 |
| F  | -5.93148300 | -0.38568300 | 1.23966700  |
| F  | -6.37208500 | 0.28550300  | -0.75476100 |
| F  | -5.29092500 | -1.55728300 | -0.44847300 |

Structure of Ir2, T<sub>2</sub> state

|   |             |             |            |
|---|-------------|-------------|------------|
| C | 1.94299600  | -1.55679300 | 3.63172300 |
| C | 1.58110200  | -1.33275200 | 2.30751700 |
| C | -0.42069200 | -0.32858500 | 2.98058300 |
| C | -0.11193300 | -0.52443400 | 4.32236500 |

|    |             |             |             |
|----|-------------|-------------|-------------|
| C  | 1.08701600  | -1.14804500 | 4.65166700  |
| H  | 2.88837800  | -2.04606800 | 3.86581300  |
| H  | -1.34762900 | 0.15524500  | 2.66842300  |
| H  | -0.81041000 | -0.18734000 | 5.08905400  |
| H  | 1.35955300  | -1.31669400 | 5.69493800  |
| C  | 2.41308600  | -1.71967800 | 1.15188200  |
| C  | 3.64483400  | -2.37196100 | 1.16642700  |
| C  | 4.26517400  | -2.65022600 | -0.05147200 |
| H  | 4.11537600  | -2.66131600 | 2.10559600  |
| C  | 2.43196700  | -1.64467800 | -1.22318100 |
| C  | 3.66350700  | -2.29678300 | -1.25947800 |
| H  | 5.23115500  | -3.15753000 | -0.05968700 |
| H  | 4.14806300  | -2.52853300 | -2.20744100 |
| C  | 1.61856400  | -1.18378600 | -2.36522100 |
| C  | 2.00286600  | -1.32049600 | -3.69495700 |
| C  | -0.37439500 | -0.14127700 | -3.00475400 |
| C  | 1.16212500  | -0.84871900 | -4.70025200 |
| H  | 2.95366100  | -1.79114200 | -3.94461400 |
| C  | -0.04373200 | -0.25026400 | -4.35114300 |
| H  | -1.30741600 | 0.32023800  | -2.67726800 |
| H  | 1.45209900  | -0.94915400 | -5.74766600 |
| H  | -0.73112600 | 0.13377100  | -5.10560200 |
| N  | 0.39953600  | -0.72223500 | 2.00415300  |
| N  | 1.87682400  | -1.37296000 | -0.03030600 |
| N  | 0.43102900  | -0.59541900 | -2.04246800 |
| Ir | 0.11680000  | -0.51989400 | -0.01676300 |
| Cl | -0.83380000 | -2.78760500 | -0.09594100 |
| C  | 0.72315900  | 1.38143700  | 0.04253900  |
| C  | 1.94253900  | 2.09324700  | 0.06877200  |
| C  | -0.42763200 | 2.31201400  | 0.06115500  |
| C  | 1.76271200  | 3.51294100  | 0.10560500  |
| C  | 3.28112800  | 1.62083300  | 0.06411800  |
| S  | 0.04031300  | 3.96212200  | 0.10741500  |
| C  | -1.72586300 | 1.79543500  | 0.04065000  |
| C  | 2.80732000  | 4.40558200  | 0.13512700  |
| C  | 4.34971500  | 2.52087900  | 0.09404600  |
| H  | 3.48199600  | 0.55108300  | 0.03716700  |
| C  | -2.94360300 | 2.53011300  | 0.05591200  |
| N  | -1.75623300 | 0.40294600  | 0.00054400  |
| C  | 4.13202600  | 3.89600000  | 0.12916000  |
| H  | 2.62959900  | 5.48285100  | 0.16258100  |
| H  | 5.37124300  | 2.13395100  | 0.08979000  |
| C  | -4.14300500 | 1.86509600  | 0.03281500  |
| H  | -2.90780500 | 3.62046000  | 0.08555500  |

|   |             |             |             |
|---|-------------|-------------|-------------|
| C | -2.92309300 | -0.23147900 | -0.02119200 |
| H | 4.97395600  | 4.59054100  | 0.15218600  |
| C | -4.13975600 | 0.44920800  | -0.00614800 |
| H | -5.08431800 | 2.41768700  | 0.04251700  |
| H | -2.87016900 | -1.32316000 | -0.05292500 |
| C | -5.43284200 | -0.30171700 | -0.01904600 |
| F | -6.13404600 | -0.09324700 | 1.10457600  |
| F | -6.21661200 | 0.09094900  | -1.03270500 |
| F | -5.25157000 | -1.61889200 | -0.13743800 |

Structure of Ir<sub>3</sub>, S<sub>0</sub> state

|    |             |             |             |
|----|-------------|-------------|-------------|
| C  | 3.65873900  | 1.19741800  | -0.41143000 |
| C  | 2.33383200  | 0.79618400  | -0.47518400 |
| C  | 2.98373100  | -1.42392500 | -0.70930200 |
| C  | 4.32824000  | -1.07414700 | -0.65035000 |
| C  | 4.70227800  | 0.26332400  | -0.49992800 |
| H  | 3.87876200  | 2.25771600  | -0.28756100 |
| H  | 2.67282600  | -2.46364400 | -0.82466000 |
| H  | 5.06714700  | -1.87063800 | -0.72354500 |
| C  | 1.18863900  | 1.72226400  | -0.37188100 |
| C  | 1.21897500  | 3.10103700  | -0.20983400 |
| C  | 0.01947900  | 3.82779500  | -0.11051700 |
| H  | 2.17884900  | 3.61367000  | -0.15371200 |
| C  | -1.17489200 | 1.73942600  | -0.36830200 |
| C  | -1.18752100 | 3.12304000  | -0.20467800 |
| H  | -2.14052200 | 3.64429700  | -0.14530800 |
| C  | -2.33471800 | 0.83201000  | -0.46846300 |
| C  | -3.65317600 | 1.25402100  | -0.40329200 |
| C  | -3.01940300 | -1.37797300 | -0.69964400 |
| C  | -4.71130600 | 0.33612600  | -0.48934600 |
| H  | -3.85624700 | 2.31790800  | -0.28080500 |
| C  | -4.35828600 | -1.00711800 | -0.63867500 |
| H  | -2.72516900 | -2.42254800 | -0.81480700 |
| H  | -5.10956200 | -1.79214500 | -0.70984000 |
| N  | 2.00823700  | -0.52006700 | -0.63043600 |
| N  | 0.00014400  | 1.09766500  | -0.42378000 |
| N  | -2.02983000 | -0.48953900 | -0.62328300 |
| Ir | -0.01341900 | -0.83917300 | -0.68376300 |
| Cl | -0.01472100 | -0.37959100 | -3.10390600 |
| C  | -0.01238000 | -1.41118500 | 1.24767700  |
| C  | -0.00238400 | -0.74445000 | 2.52618700  |
| C  | -0.02228100 | -2.78126700 | 1.41158200  |
| C  | -0.00606700 | -1.66618300 | 3.61099500  |
| C  | 0.01052500  | 0.63210700  | 2.83135400  |



|   |             |             |             |
|---|-------------|-------------|-------------|
| S | -0.02104000 | -3.32071500 | 3.07212500  |
| C | -0.03149600 | -3.62701200 | 0.24511500  |
| C | 0.00211400  | -1.24206000 | 4.94386200  |
| C | 0.01901600  | 1.05405200  | 4.15131500  |
| H | 0.01417100  | 1.37046100  | 2.03106300  |
| C | -0.04171600 | -5.02617700 | 0.22601700  |
| N | -0.02906900 | -2.91756500 | -0.91848100 |
| C | 0.01464600  | 0.12200100  | 5.20407100  |
| H | -0.00106100 | -1.96728100 | 5.76051300  |
| H | 0.02932200  | 2.12322100  | 4.37549500  |
| C | -0.04956000 | -5.68813700 | -0.99372700 |
| H | -0.04328800 | -5.57765800 | 1.16775300  |
| C | -0.03666400 | -3.56014300 | -2.09505700 |
| H | 0.02133600  | 0.47201000  | 6.23903900  |
| C | -0.04704700 | -4.94531100 | -2.17624400 |
| H | -0.05757000 | -6.77978200 | -1.02459800 |
| H | -0.03403800 | -2.91602400 | -2.97807800 |
| H | -0.05297700 | -5.42765000 | -3.15425200 |
| C | 0.07196200  | 5.33863000  | 0.09955700  |
| C | -6.15360300 | 0.82311500  | -0.41375400 |
| C | 6.15206600  | 0.72768500  | -0.42485700 |
| C | -6.36632000 | 1.52170400  | 0.93936400  |
| H | -6.18312500 | 0.82879300  | 1.77476700  |
| H | -5.70440000 | 2.39155400  | 1.06468300  |
| H | -7.40458600 | 1.88000300  | 1.01215100  |
| C | -6.39940000 | 1.81876200  | -1.55916900 |
| H | -7.43843700 | 2.17990100  | -1.51929600 |
| H | -5.73963600 | 2.69668900  | -1.49384200 |
| H | -6.23925300 | 1.34211000  | -2.53829600 |
| C | -7.15074200 | -0.32963900 | -0.53808900 |
| H | -7.05055100 | -0.85597300 | -1.49966800 |
| H | -7.03407500 | -1.06223100 | 0.27505500  |
| H | -8.17540500 | 0.06620600  | -0.48222600 |
| C | -1.32549800 | 5.95366800  | 0.18829400  |
| H | -1.23639000 | 7.03893300  | 0.34192200  |
| H | -1.90322700 | 5.79762800  | -0.73555000 |
| H | -1.90019400 | 5.54691600  | 1.03439200  |
| C | 0.82137500  | 5.62218000  | 1.41216100  |
| H | 0.30997200  | 5.15400400  | 2.26737500  |
| H | 1.85653300  | 5.25034200  | 1.38736300  |
| H | 0.86207300  | 6.70785300  | 1.58866700  |
| C | 0.82127100  | 5.97815900  | -1.08061600 |
| H | 0.87081700  | 7.06872200  | -0.94038800 |
| H | 1.85334100  | 5.60723300  | -1.16734500 |

|   |            |             |             |
|---|------------|-------------|-------------|
| H | 0.30450200 | 5.77745500  | -2.03149000 |
| C | 6.37723500 | 1.41809400  | 0.93048000  |
| H | 5.72930000 | 2.29788400  | 1.05954500  |
| H | 6.18392900 | 0.72526400  | 1.76367000  |
| H | 7.42113200 | 1.75963900  | 1.00341500  |
| C | 7.13097200 | -0.44000000 | -0.55449900 |
| H | 7.02064200 | -0.96192700 | -1.51737000 |
| H | 8.16176300 | -0.06028900 | -0.49954900 |
| H | 7.00456800 | -1.17305200 | 0.25676600  |
| C | 6.41205800 | 1.72347000  | -1.56700800 |
| H | 7.45669200 | 2.06810200  | -1.52710700 |
| H | 6.24336000 | 1.25290300  | -2.54764100 |
| H | 5.76633500 | 2.61150000  | -1.49779700 |

Structure of Ir<sub>3</sub>, S<sub>1</sub> state

|    |             |             |             |
|----|-------------|-------------|-------------|
| C  | 3.72102300  | 1.13073300  | -0.39614900 |
| C  | 2.38606700  | 0.75040800  | -0.46011600 |
| C  | 3.01951000  | -1.48794700 | -0.65906800 |
| C  | 4.36296100  | -1.15487800 | -0.60283500 |
| C  | 4.75090300  | 0.18659300  | -0.46766200 |
| H  | 3.95136500  | 2.19090700  | -0.29006100 |
| H  | 2.69824400  | -2.52594400 | -0.76265200 |
| H  | 5.09381300  | -1.95938500 | -0.66655000 |
| C  | 1.25417300  | 1.68748400  | -0.39152200 |
| C  | 1.30359800  | 3.05597300  | -0.23743200 |
| C  | 0.08842300  | 3.80284100  | -0.16059500 |
| H  | 2.26682200  | 3.55957000  | -0.16701200 |
| C  | -1.14742500 | 1.72177500  | -0.44214500 |
| C  | -1.11580400 | 3.12082500  | -0.27779200 |
| H  | -2.06037100 | 3.66065300  | -0.23476500 |
| C  | -2.28069900 | 0.85540800  | -0.55376900 |
| C  | -3.62680700 | 1.27313000  | -0.51921300 |
| C  | -3.01077800 | -1.37347400 | -0.80267100 |
| C  | -4.67553900 | 0.37595000  | -0.62905200 |
| H  | -3.82539100 | 2.33920800  | -0.40020100 |
| C  | -4.33691700 | -0.99577700 | -0.77798300 |
| H  | -2.72784500 | -2.42261800 | -0.91160600 |
| H  | -5.09578700 | -1.76934200 | -0.87458300 |
| N  | 2.04978100  | -0.56982600 | -0.59243400 |
| N  | 0.05627100  | 1.06880700  | -0.46122700 |
| N  | -2.00094400 | -0.49966900 | -0.69946000 |
| Ir | 0.00900400  | -0.87739100 | -0.64740200 |
| Cl | 0.08624700  | -0.54304900 | -3.07503700 |
| C  | -0.08733400 | -1.30866600 | 1.25387400  |

|   |             |             |             |
|---|-------------|-------------|-------------|
| C | -0.15466300 | -0.57873800 | 2.49691300  |
| C | -0.13546000 | -2.70723300 | 1.51213400  |
| C | -0.24484100 | -1.43799500 | 3.62138000  |
| C | -0.13970100 | 0.80861500  | 2.72648700  |
| S | -0.25367400 | -3.13100400 | 3.16044700  |
| C | -0.09771000 | -3.62005200 | 0.39628800  |
| C | -0.31791900 | -0.96337600 | 4.92392000  |
| C | -0.21238100 | 1.29571600  | 4.02831200  |
| H | -0.07255600 | 1.50118800  | 1.89066700  |
| C | -0.12480900 | -5.01413600 | 0.46512900  |
| N | -0.03022600 | -2.97144400 | -0.79867600 |
| C | -0.30095400 | 0.42156500  | 5.11579200  |
| H | -0.38632100 | -1.64525400 | 5.77341600  |
| H | -0.20014900 | 2.37403800  | 4.19865200  |
| C | -0.08101100 | -5.74570200 | -0.71662300 |
| H | -0.17947800 | -5.51106700 | 1.43514000  |
| C | 0.01176300  | -3.67457800 | -1.93214300 |
| H | -0.35763600 | 0.81999600  | 6.13095100  |
| C | -0.01203200 | -5.06775500 | -1.93151400 |
| H | -0.10098600 | -6.83664400 | -0.68814700 |
| H | 0.06350800  | -3.08359500 | -2.85028900 |
| H | 0.02287800  | -5.60376700 | -2.88063400 |
| C | 0.16637100  | 5.31206800  | 0.05829900  |
| C | -6.12162900 | 0.87055300  | -0.58387600 |
| C | 6.20705200  | 0.63390600  | -0.39577700 |
| C | -6.37002300 | 1.56894000  | 0.76264500  |
| H | -6.20416100 | 0.87585000  | 1.60197400  |
| H | -5.70787000 | 2.43646200  | 0.90243000  |
| H | -7.40965600 | 1.92886800  | 0.81605900  |
| C | -6.34867700 | 1.86686100  | -1.73182400 |
| H | -7.38797100 | 2.23125100  | -1.71624800 |
| H | -5.68637000 | 2.74177700  | -1.65244700 |
| H | -6.16735000 | 1.39068800  | -2.70784100 |
| C | -7.12314200 | -0.27719800 | -0.72971000 |
| H | -7.00511600 | -0.80384800 | -1.68912200 |
| H | -7.02462800 | -1.01253200 | 0.08349800  |
| H | -8.14805500 | 0.12166900  | -0.69388200 |
| C | -1.21884600 | 5.95855500  | 0.10567400  |
| H | -1.11426300 | 7.04218400  | 0.26447000  |
| H | -1.77090500 | 5.81268300  | -0.83555000 |
| H | -1.82849400 | 5.56028200  | 0.93128500  |
| C | 0.87677900  | 5.57909100  | 1.39583900  |
| H | 0.32191800  | 5.12437800  | 2.23154400  |
| H | 1.89977700  | 5.17377600  | 1.40775600  |

|   |            |             |             |
|---|------------|-------------|-------------|
| H | 0.94588900 | 6.66289800  | 1.57863900  |
| C | 0.96510900 | 5.95049500  | -1.08935700 |
| H | 1.03735400 | 7.03898200  | -0.93897600 |
| H | 1.99039900 | 5.55586100  | -1.15059600 |
| H | 0.47321900 | 5.77003600  | -2.05766400 |
| C | 6.44070400 | 1.33647000  | 0.95180600  |
| H | 5.80211300 | 2.22455100  | 1.07026800  |
| H | 6.23848400 | 0.65519100  | 1.79249000  |
| H | 7.48850500 | 1.66686900  | 1.02265900  |
| C | 7.17248600 | -0.54671500 | -0.51116300 |
| H | 7.05697200 | -1.07805100 | -1.46828200 |
| H | 8.20795800 | -0.17925500 | -0.45886200 |
| H | 7.03596800 | -1.26959100 | 0.30759800  |
| C | 6.48327000 | 1.61388900  | -1.54773500 |
| H | 7.53260100 | 1.94483000  | -1.51077600 |
| H | 6.30888600 | 1.13537400  | -2.52359400 |
| H | 5.84922700 | 2.51101600  | -1.48872500 |

#### Structure of Ir<sub>3</sub>, T<sub>1</sub> state

|   |             |             |             |
|---|-------------|-------------|-------------|
| C | 3.68994100  | 1.14108000  | -0.46528900 |
| C | 2.35462200  | 0.75874200  | -0.49963100 |
| C | 2.98637200  | -1.47736000 | -0.72967500 |
| C | 4.33041400  | -1.14236900 | -0.70421200 |
| C | 4.71890200  | 0.19835600  | -0.56745200 |
| H | 3.92148300  | 2.20074000  | -0.35753200 |
| H | 2.66325500  | -2.51471800 | -0.83376100 |
| H | 5.06099200  | -1.94485000 | -0.79192800 |
| C | 1.22309700  | 1.69389100  | -0.40089200 |
| C | 1.27386300  | 3.06185200  | -0.24584900 |
| C | 0.05814100  | 3.80710400  | -0.13895100 |
| H | 2.23767500  | 3.56700300  | -0.19745400 |
| C | -1.18005700 | 1.72391500  | -0.40402800 |
| C | -1.14600600 | 3.12455400  | -0.23346900 |
| H | -2.09059400 | 3.66250000  | -0.16884200 |
| C | -2.31027700 | 0.85684400  | -0.50655900 |
| C | -3.65888400 | 1.26980000  | -0.46606300 |
| C | -3.03686000 | -1.37763700 | -0.75650200 |
| C | -4.70428300 | 0.37033200  | -0.57502400 |
| H | -3.85993000 | 2.33546000  | -0.34622900 |
| C | -4.36203300 | -1.00239500 | -0.72692800 |
| H | -2.75125900 | -2.42583300 | -0.86751500 |
| H | -5.11992500 | -1.77747500 | -0.82113000 |
| N | 2.01862300  | -0.56062400 | -0.63098800 |
| N | 0.02486800  | 1.07210700  | -0.44394500 |

|    |             |             |             |
|----|-------------|-------------|-------------|
| N  | -2.02719600 | -0.49976400 | -0.65532800 |
| Ir | -0.02568100 | -0.87271400 | -0.63429000 |
| Cl | 0.02235800  | -0.53477300 | -3.06385100 |
| C  | -0.03803900 | -1.31717700 | 1.26490500  |
| C  | -0.02290000 | -0.59204900 | 2.51273400  |
| C  | -0.06504400 | -2.71644700 | 1.51608700  |
| C  | -0.03422100 | -1.45833200 | 3.63576400  |
| C  | -0.00258500 | 0.79462600  | 2.74704000  |
| S  | -0.06847800 | -3.15025400 | 3.16933600  |
| C  | -0.08876900 | -3.62336800 | 0.39616000  |
| C  | -0.02230700 | -0.98863300 | 4.94323300  |
| C  | 0.01013700  | 1.27483900  | 4.05185100  |
| H  | 0.00014300  | 1.49108300  | 1.91100800  |
| C  | -0.12326000 | -5.01794900 | 0.45917100  |
| N  | -0.07482100 | -2.96956600 | -0.79812300 |
| C  | 0.00117100  | 0.39400300  | 5.13946100  |
| H  | -0.03149400 | -1.67473800 | 5.79214900  |
| H  | 0.02635800  | 2.35245900  | 4.22702800  |
| C  | -0.14207400 | -5.74314200 | -0.72726800 |
| H  | -0.13516200 | -5.51960000 | 1.42824600  |
| C  | -0.09110000 | -3.66646900 | -1.93586100 |
| H  | 0.01110500  | 0.78820000  | 6.15799800  |
| C  | -0.12505200 | -5.05957400 | -1.94098900 |
| H  | -0.16960000 | -6.83410600 | -0.70332200 |
| H  | -0.07634100 | -3.07123600 | -2.85263300 |
| H  | -0.13854600 | -5.59075300 | -2.89341600 |
| C  | 0.13953300  | 5.31550600  | 0.08407400  |
| C  | -6.15204600 | 0.85983600  | -0.52829800 |
| C  | 6.17550500  | 0.64728400  | -0.52525500 |
| C  | -6.40169300 | 1.55782900  | 0.81823800  |
| H  | -6.23309100 | 0.86558300  | 1.65769500  |
| H  | -5.74236300 | 2.42759400  | 0.95717700  |
| H  | -7.44255300 | 1.91422600  | 0.87202800  |
| C  | -6.38336300 | 1.85530400  | -1.67628700 |
| H  | -7.42408300 | 2.21567500  | -1.66001500 |
| H  | -5.72427900 | 2.73263900  | -1.59716600 |
| H  | -6.20087100 | 1.37978500  | -2.65239400 |
| C  | -7.15002500 | -0.29116700 | -0.67318800 |
| H  | -7.03137600 | -0.81747300 | -1.63270200 |
| H  | -7.04865800 | -1.02611600 | 0.13999800  |
| H  | -8.17611300 | 0.10462000  | -0.63649500 |
| C  | -1.24486500 | 5.95964800  | 0.16995000  |
| H  | -1.13783900 | 7.04266300  | 0.33149300  |
| H  | -1.82056200 | 5.81779700  | -0.75761200 |

|   |             |             |             |
|---|-------------|-------------|-------------|
| H | -1.83265000 | 5.55611700  | 1.00876200  |
| C | 0.88432600  | 5.57886600  | 1.40355700  |
| H | 0.35238100  | 5.12035200  | 2.25196800  |
| H | 1.90808500  | 5.17563100  | 1.38732500  |
| H | 0.95617400  | 6.66219800  | 1.58824000  |
| C | 0.90747800  | 5.95925100  | -1.08159700 |
| H | 0.98370200  | 7.04708400  | -0.92817600 |
| H | 1.93075300  | 5.56495900  | -1.17187900 |
| H | 0.38995800  | 5.78313800  | -2.03725900 |
| C | 6.43651200  | 1.34526500  | 0.81974500  |
| H | 5.80014800  | 2.23252000  | 0.95495300  |
| H | 6.25274900  | 0.66077900  | 1.66203800  |
| H | 7.48533800  | 1.67612700  | 0.86940200  |
| C | 7.13980100  | -0.53151700 | -0.66536000 |
| H | 7.00515300  | -1.05938200 | -1.62186900 |
| H | 8.17553700  | -0.16258300 | -0.63338500 |
| H | 7.02146400  | -1.25753900 | 0.15345400  |
| C | 6.42470300  | 1.63186700  | -1.67948600 |
| H | 7.47401400  | 1.96438800  | -1.66378600 |
| H | 6.23020800  | 1.15648300  | -2.65304600 |
| H | 5.79059600  | 2.52765500  | -1.60346000 |

#### Structure of Ir<sub>3</sub>, T<sub>2</sub> state

|   |             |             |             |
|---|-------------|-------------|-------------|
| C | 3.70225400  | 1.10760900  | -0.52549100 |
| C | 2.35939200  | 0.74451400  | -0.55352100 |
| C | 2.94904900  | -1.50598200 | -0.73160000 |
| C | 4.30110100  | -1.19197800 | -0.70976000 |
| C | 4.71316800  | 0.14385700  | -0.60480000 |
| H | 3.95173000  | 2.16505400  | -0.43741600 |
| H | 2.60723800  | -2.53950900 | -0.81075100 |
| H | 5.01736300  | -2.00925400 | -0.77480500 |
| C | 1.24227000  | 1.68304000  | -0.45810800 |
| C | 1.28014400  | 3.04895500  | -0.31243200 |
| C | 0.05284100  | 3.80709700  | -0.17657000 |
| H | 2.24165800  | 3.56013600  | -0.28440700 |
| C | -1.20545200 | 1.73179000  | -0.40325000 |
| C | -1.16184100 | 3.12348900  | -0.23657400 |
| H | -2.10169000 | 3.66544600  | -0.14704900 |
| C | -2.34173400 | 0.86670200  | -0.48496400 |
| C | -3.68104800 | 1.29262300  | -0.42140100 |
| C | -3.06068300 | -1.35244900 | -0.70081100 |
| C | -4.73600800 | 0.38642100  | -0.50054700 |
| H | -3.87634100 | 2.35920800  | -0.30726600 |
| C | -4.39711000 | -0.97177500 | -0.64368100 |

|    |             |             |             |
|----|-------------|-------------|-------------|
| H  | -2.78136000 | -2.40215200 | -0.81027600 |
| H  | -5.15422700 | -1.75041300 | -0.71325800 |
| N  | 2.00083700  | -0.57123000 | -0.66068200 |
| N  | 0.02320300  | 1.04964700  | -0.48094000 |
| N  | -2.06076700 | -0.47868700 | -0.63115700 |
| Ir | -0.03638500 | -0.83754700 | -0.67230900 |
| Cl | -0.02004900 | -0.69870300 | -3.10127500 |
| C  | -0.01211100 | -1.32104000 | 1.28660700  |
| C  | 0.10675700  | -0.56437700 | 2.50773300  |
| C  | -0.08957800 | -2.67220800 | 1.54164200  |
| C  | 0.09932800  | -1.41222600 | 3.65110400  |
| C  | 0.20164400  | 0.82580800  | 2.71748900  |
| S  | -0.03223900 | -3.09480700 | 3.22924000  |
| C  | -0.16705900 | -3.59520600 | 0.43806900  |
| C  | 0.18231500  | -0.90328700 | 4.95070400  |
| C  | 0.28546200  | 1.33114500  | 4.00502600  |
| H  | 0.20903300  | 1.50919800  | 1.87109400  |
| C  | -0.25822700 | -4.98716800 | 0.53084700  |
| N  | -0.14721400 | -2.97361600 | -0.77251400 |
| C  | 0.27801200  | 0.47211300  | 5.11742900  |
| H  | 0.16914600  | -1.57249200 | 5.81365000  |
| H  | 0.35924500  | 2.41073600  | 4.15447000  |
| C  | -0.33563600 | -5.73983000 | -0.63259000 |
| H  | -0.26841300 | -5.46221300 | 1.51316800  |
| C  | -0.22543600 | -3.70483900 | -1.89346900 |
| H  | 0.34579500  | 0.88807100  | 6.12527400  |
| C  | -0.31918900 | -5.08916800 | -1.86668600 |
| H  | -0.40791800 | -6.82804600 | -0.57865500 |
| H  | -0.20691800 | -3.14007300 | -2.82772700 |
| H  | -0.37507700 | -5.64125400 | -2.80534900 |
| C  | 0.15147200  | 5.30874200  | 0.04781300  |
| C  | -6.17860600 | 0.88109800  | -0.42881700 |
| C  | 6.17798600  | 0.56680600  | -0.56717000 |
| C  | -6.39232500 | 1.59104200  | 0.91783100  |
| H  | -6.21037100 | 0.90455500  | 1.75896200  |
| H  | -5.72726700 | 2.45946200  | 1.03604500  |
| H  | -7.42983600 | 1.95269000  | 0.98876100  |
| C  | -6.42380500 | 1.86803600  | -1.58148300 |
| H  | -7.46219900 | 2.23232300  | -1.54641500 |
| H  | -5.76103800 | 2.74414900  | -1.52258300 |
| H  | -6.26340400 | 1.38337900  | -2.55678400 |
| C  | -7.18184000 | -0.26790900 | -0.54395000 |
| H  | -7.08480600 | -0.80209300 | -1.50152500 |
| H  | -7.06751100 | -0.99551700 | 0.27403500  |



|   |             |             |             |
|---|-------------|-------------|-------------|
| H | -8.20496800 | 0.13267200  | -0.49012200 |
| C | -1.22563200 | 5.96289400  | 0.16641400  |
| H | -1.10563900 | 7.04452700  | 0.32624700  |
| H | -1.82321800 | 5.82715900  | -0.74804900 |
| H | -1.79642600 | 5.56399800  | 1.01894500  |
| C | 0.92945200  | 5.55783600  | 1.35241300  |
| H | 0.41305200  | 5.10033400  | 2.21065700  |
| H | 1.95077600  | 5.15006900  | 1.31256100  |
| H | 1.01193300  | 6.64014200  | 1.53740600  |
| C | 0.90062200  | 5.94764300  | -1.13399600 |
| H | 0.99117000  | 7.03327900  | -0.97454600 |
| H | 1.91819500  | 5.54562400  | -1.25040100 |
| H | 0.35869100  | 5.78303400  | -2.07785200 |
| C | 6.44943400  | 1.27618500  | 0.76977200  |
| H | 5.82932600  | 2.17667100  | 0.89278900  |
| H | 6.25130700  | 0.60560100  | 1.61991200  |
| H | 7.50413700  | 1.58802200  | 0.81751200  |
| C | 7.12030800  | -0.63139100 | -0.69128400 |
| H | 6.97455500  | -1.17046400 | -1.63989700 |
| H | 8.16255600  | -0.28083100 | -0.66577100 |
| H | 6.99032200  | -1.34314200 | 0.13818200  |
| C | 6.44691200  | 1.53214200  | -1.73298200 |
| H | 7.50274700  | 1.84332400  | -1.72080600 |
| H | 6.24308700  | 1.04924900  | -2.70092700 |
| H | 5.83181000  | 2.44199500  | -1.66803800 |

#### Structure of Ir4, S<sub>0</sub> state

|   |             |             |             |
|---|-------------|-------------|-------------|
| C | 2.88203600  | -2.71780500 | -0.59380400 |
| C | 1.96879600  | -1.67713600 | -0.53839900 |
| C | 0.23605000  | -3.17632900 | -0.14286400 |
| C | 1.11113000  | -4.25587100 | -0.18902500 |
| C | 2.47317500  | -4.04894800 | -0.41992600 |
| H | 3.93147200  | -2.48416000 | -0.77254100 |
| H | -0.83047400 | -3.31933500 | 0.03834400  |
| H | 0.70056500  | -5.25319900 | -0.03925700 |
| C | 2.33186800  | -0.25520700 | -0.69828500 |
| C | 3.59129800  | 0.28188400  | -0.92925000 |
| C | 3.75739500  | 1.67371500  | -1.03789900 |
| H | 4.44986400  | -0.38294600 | -1.01842900 |
| C | 1.37261400  | 1.90546000  | -0.69960900 |
| C | 2.61904600  | 2.48320600  | -0.93161100 |
| H | 2.69741800  | 3.56435200  | -1.02202500 |
| C | 0.07547200  | 2.59154200  | -0.53986200 |
| C | -0.08382200 | 3.96705500  | -0.59635400 |

|    |             |             |             |
|----|-------------|-------------|-------------|
| C  | -2.19815500 | 2.31284400  | -0.13901100 |
| C  | -1.34504100 | 4.55698200  | -0.42018000 |
| H  | 0.79264100  | 4.58900200  | -0.77774200 |
| C  | -2.41159100 | 3.68609100  | -0.18545800 |
| H  | -3.01953400 | 1.61829900  | 0.04440300  |
| H  | -3.42616400 | 4.05097700  | -0.03322600 |
| N  | 0.64449600  | -1.92015700 | -0.31594200 |
| N  | 1.28229100  | 0.57436800  | -0.57226200 |
| N  | -0.99331600 | 1.77274000  | -0.31491100 |
| Ir | -0.48186800 | -0.20999800 | -0.27090000 |
| Cl | -0.72213600 | -0.31621600 | -2.71645300 |
| C  | -0.48203100 | -0.21045000 | 1.74124600  |
| C  | 0.43458100  | 0.19187900  | 2.77765900  |
| C  | -1.64369300 | -0.72208000 | 2.29047700  |
| C  | -0.09249400 | -0.04073400 | 4.07952200  |
| C  | 1.72291900  | 0.75708000  | 2.67793000  |
| S  | -1.68437800 | -0.74090100 | 4.03589400  |
| C  | -2.68332500 | -1.18263800 | 1.41420600  |
| C  | 0.62734800  | 0.27444100  | 5.23682800  |
| C  | 2.43714700  | 1.06908300  | 3.82305200  |
| H  | 2.16245700  | 0.95045600  | 1.70076400  |
| C  | -3.91825100 | -1.73027700 | 1.79138500  |
| N  | -2.36314200 | -1.04407800 | 0.09580700  |
| C  | 1.89241400  | 0.82925000  | 5.09732600  |
| H  | 0.20403700  | 0.08799600  | 6.22613900  |
| H  | 3.43441100  | 1.50601800  | 3.73460700  |
| C  | -4.81048000 | -2.12995600 | 0.81383300  |
| H  | -4.16113000 | -1.83793800 | 2.84938300  |
| C  | -3.22525300 | -1.42979100 | -0.85079200 |
| H  | 2.46967900  | 1.08158000  | 5.98993600  |
| C  | -4.45901100 | -1.97693200 | -0.53320400 |
| H  | -5.77393800 | -2.56301800 | 1.09114700  |
| H  | -2.89084400 | -1.28781000 | -1.88184700 |
| C  | 5.15448100  | 2.24901500  | -1.25331700 |
| C  | -1.49541600 | 6.07221100  | -0.48561300 |
| C  | 3.49611800  | -5.17681900 | -0.48524100 |
| C  | -0.61667000 | 6.70182700  | 0.60778200  |
| H  | -0.92338100 | 6.35847100  | 1.60757600  |
| H  | 0.44808900  | 6.45932800  | 0.47402200  |
| H  | -0.71484900 | 7.79772100  | 0.57639200  |
| C  | -1.03134500 | 6.55417100  | -1.86997700 |
| H  | -1.13411900 | 7.64818100  | -1.93449900 |
| H  | 0.02327500  | 6.30722600  | -2.06297700 |
| H  | -1.64013000 | 6.10474100  | -2.66927300 |

|   |             |             |             |
|---|-------------|-------------|-------------|
| C | -2.94461200 | 6.50983000  | -0.26937300 |
| H | -3.61573900 | 6.09880000  | -1.03896300 |
| H | -3.32070500 | 6.20755100  | 0.71996200  |
| H | -3.00746800 | 7.60641100  | -0.32655000 |
| C | 5.13468400  | 3.77393600  | -1.36838200 |
| H | 6.15972800  | 4.14041100  | -1.52422200 |
| H | 4.52906600  | 4.11368100  | -2.22248200 |
| H | 4.75027500  | 4.25054000  | -0.45366400 |
| C | 6.02994800  | 1.85394500  | -0.05209200 |
| H | 5.61364000  | 2.25106300  | 0.88654600  |
| H | 6.12407900  | 0.76259600  | 0.05026700  |
| H | 7.04278300  | 2.26543200  | -0.17997500 |
| C | 5.74291700  | 1.66254200  | -2.54667400 |
| H | 6.75194600  | 2.07007700  | -2.71135900 |
| H | 5.83116100  | 0.56676400  | -2.50488700 |
| H | 5.12142100  | 1.92332300  | -3.41684500 |
| C | 4.55739500  | -4.94382800 | 0.60266300  |
| H | 5.09230500  | -3.99255600 | 0.46324000  |
| H | 4.10152600  | -4.93687700 | 1.60451900  |
| H | 5.30358000  | -5.75237900 | 0.57098300  |
| C | 2.84996100  | -6.54464500 | -0.26168100 |
| H | 2.09430900  | -6.77118100 | -1.02931100 |
| H | 3.62173500  | -7.32638000 | -0.31618900 |
| H | 2.37465100  | -6.61649200 | 0.72854100  |
| C | 4.15865200  | -5.16020600 | -1.87274000 |
| H | 4.90180900  | -5.96961400 | -1.93779000 |
| H | 3.41356300  | -5.31398600 | -2.66817100 |
| H | 4.68059300  | -4.21228200 | -2.07147900 |
| C | -5.41501900 | -2.38029600 | -1.61752700 |
| F | -6.46421300 | -1.55133300 | -1.67762900 |
| F | -4.83613500 | -2.37912100 | -2.81936900 |
| F | -5.90332900 | -3.60613400 | -1.40097600 |

#### Structure of Ir4, S<sub>1</sub> state

|   |             |             |             |
|---|-------------|-------------|-------------|
| C | 2.25872600  | -3.30387500 | -0.54911000 |
| C | 1.58761300  | -2.08759600 | -0.50928000 |
| C | -0.42909100 | -3.19864300 | -0.12001600 |
| C | 0.19766200  | -4.43318900 | -0.15387100 |
| C | 1.58121800  | -4.51494100 | -0.37317800 |
| H | 3.33475700  | -3.29476100 | -0.72367500 |
| H | -1.50388500 | -3.11594900 | 0.05025100  |
| H | -0.41322500 | -5.32233300 | -0.00691200 |
| C | 2.23457000  | -0.77882100 | -0.68319000 |
| C | 3.57296700  | -0.52219200 | -0.88685600 |

|    |             |             |             |
|----|-------------|-------------|-------------|
| C  | 4.02520300  | 0.82740100  | -1.00301100 |
| H  | 4.27985400  | -1.34833700 | -0.95058200 |
| C  | 1.71937600  | 1.56783100  | -0.73651900 |
| C  | 3.08479600  | 1.84776200  | -0.93870400 |
| H  | 3.39342200  | 2.88733200  | -1.03530500 |
| C  | 0.62310600  | 2.47997500  | -0.61990100 |
| C  | 0.72595800  | 3.88384400  | -0.69234700 |
| C  | -1.70191800 | 2.69769900  | -0.28963700 |
| C  | -0.38029000 | 4.70702900  | -0.56750400 |
| H  | 1.71599400  | 4.31383500  | -0.85023000 |
| C  | -1.63478700 | 4.07292900  | -0.36198500 |
| H  | -2.65546600 | 2.19107000  | -0.12772600 |
| H  | -2.55706200 | 4.64062400  | -0.25798900 |
| N  | 0.23618400  | -2.05156500 | -0.29283600 |
| N  | 1.36718600  | 0.25248400  | -0.58869200 |
| N  | -0.62735800 | 1.90693800  | -0.41232100 |
| Ir | -0.52169200 | -0.13083000 | -0.26274600 |
| Cl | -0.81525700 | -0.27760700 | -2.68931700 |
| C  | -0.46732900 | -0.02279500 | 1.68491800  |
| C  | 0.52074100  | 0.26627200  | 2.69628300  |
| C  | -1.72938500 | -0.25952500 | 2.29818600  |
| C  | -0.02416500 | 0.23373500  | 4.00495400  |
| C  | 1.88891400  | 0.55896500  | 2.55858700  |
| S  | -1.73627100 | -0.14372500 | 3.99913900  |
| C  | -2.86387700 | -0.55145400 | 1.45742000  |
| C  | 0.73589400  | 0.47885400  | 5.14075500  |
| C  | 2.66095900  | 0.80599800  | 3.69051500  |
| H  | 2.34560000  | 0.59381600  | 1.57219100  |
| C  | -4.16729000 | -0.81841800 | 1.88311900  |
| N  | -2.54071500 | -0.54684100 | 0.13573900  |
| C  | 2.09290900  | 0.76757600  | 4.96724100  |
| H  | 0.29296300  | 0.44809800  | 6.13774100  |
| H  | 3.72273700  | 1.03261800  | 3.57578400  |
| C  | -5.14371300 | -1.07969400 | 0.93325800  |
| H  | -4.40700600 | -0.82198800 | 2.94727100  |
| C  | -3.47612300 | -0.79656600 | -0.77982600 |
| H  | 2.71233200  | 0.96451300  | 5.84471400  |
| C  | -4.79263500 | -1.06487400 | -0.41701300 |
| H  | -6.16838600 | -1.29737200 | 1.24003100  |
| H  | -3.14089900 | -0.77789300 | -1.82057300 |
| C  | 5.51905200  | 1.08971400  | -1.17996300 |
| C  | -0.22485800 | 6.22575000  | -0.64970700 |
| C  | 2.34441800  | -5.83422600 | -0.42245800 |
| C  | 0.72783600  | 6.69334400  | 0.46215800  |

|   |             |             |             |
|---|-------------|-------------|-------------|
| H | 0.33314700  | 6.42930700  | 1.45555700  |
| H | 1.72681600  | 6.24314300  | 0.36254000  |
| H | 0.84834400  | 7.78739900  | 0.42132200  |
| C | 0.36087900  | 6.59660100  | -2.02141700 |
| H | 0.47596400  | 7.68914200  | -2.10035500 |
| H | 1.35076600  | 6.14341700  | -2.18032200 |
| H | -0.30090000 | 6.26231700  | -2.83536900 |
| C | -1.56365500 | 6.94701300  | -0.47967200 |
| H | -2.28160500 | 6.66827100  | -1.26613600 |
| H | -2.02161100 | 6.73469100  | 0.49857500  |
| H | -1.40695600 | 8.03425600  | -0.54383400 |
| C | 5.82974300  | 2.58213900  | -1.30334000 |
| H | 6.91351700  | 2.72352000  | -1.42907800 |
| H | 5.33273300  | 3.03267500  | -2.17623000 |
| H | 5.52545300  | 3.13968100  | -0.40416600 |
| C | 6.26446100  | 0.53407800  | 0.04507100  |
| H | 5.92206400  | 1.02653500  | 0.96878400  |
| H | 6.11414200  | -0.54966700 | 0.16277000  |
| H | 7.34658200  | 0.71093100  | -0.05757300 |
| C | 6.01145700  | 0.38065700  | -2.45169700 |
| H | 7.09029900  | 0.55492300  | -2.58703400 |
| H | 5.85506800  | -0.70752800 | -2.40645100 |
| H | 5.48801500  | 0.76267200  | -3.34173800 |
| C | 3.40791100  | -5.83068700 | 0.68800200  |
| H | 4.13118800  | -5.01083800 | 0.56478900  |
| H | 2.94211900  | -5.72958600 | 1.68025400  |
| H | 3.96990200  | -6.77711700 | 0.66799100  |
| C | 1.42039100  | -7.03559400 | -0.21714000 |
| H | 0.64808200  | -7.09656600 | -0.99914500 |
| H | 2.01043400  | -7.96288900 | -0.26129100 |
| H | 0.92203000  | -7.00660600 | 0.76388600  |
| C | 3.02539600  | -5.96188000 | -1.79492800 |
| H | 3.58150000  | -6.91054700 | -1.84742200 |
| H | 2.28185100  | -5.95495200 | -2.60654800 |
| H | 3.74009100  | -5.14613500 | -1.97938200 |
| C | -5.83361800 | -1.30224000 | -1.47903100 |
| F | -6.57293500 | -0.20784300 | -1.67862800 |
| F | -5.28015900 | -1.63239300 | -2.64521800 |
| F | -6.66516700 | -2.28262500 | -1.12326500 |

Structure of Ir4, T<sub>1</sub> state

|   |            |             |             |
|---|------------|-------------|-------------|
| C | 3.30145700 | -2.23152500 | -0.60660900 |
| C | 2.23389900 | -1.34463300 | -0.53993100 |
| C | 0.76447800 | -3.12030300 | -0.16291500 |

|    |             |             |             |
|----|-------------|-------------|-------------|
| C  | 1.79756100  | -4.04094200 | -0.22286000 |
| C  | 3.11273800  | -3.60905000 | -0.44987700 |
| H  | 4.29824500  | -1.82856500 | -0.78671900 |
| H  | -0.26525300 | -3.43601000 | 0.01334800  |
| H  | 1.55467200  | -5.09382100 | -0.08962000 |
| C  | 2.35734400  | 0.11275500  | -0.69257900 |
| C  | 3.50660500  | 0.84177400  | -0.90481000 |
| C  | 3.43425800  | 2.26650200  | -0.99969900 |
| H  | 4.46412100  | 0.32993300  | -0.99134500 |
| C  | 1.01981100  | 2.11003200  | -0.70287500 |
| C  | 2.18915600  | 2.87220300  | -0.90957000 |
| H  | 2.09562600  | 3.95397900  | -0.99204200 |
| C  | -0.33211500 | 2.55227800  | -0.57584500 |
| C  | -0.75767100 | 3.89571000  | -0.63823600 |
| C  | -2.57654600 | 1.89172200  | -0.24237400 |
| C  | -2.08866800 | 4.24971000  | -0.50926100 |
| H  | 0.00302500  | 4.66209200  | -0.79319000 |
| C  | -3.02084900 | 3.19362200  | -0.30671100 |
| H  | -3.27408600 | 1.06711700  | -0.08162800 |
| H  | -4.08723800 | 3.38046300  | -0.19761200 |
| N  | 0.96621600  | -1.80776800 | -0.31662000 |
| N  | 1.17496600  | 0.75500300  | -0.56849800 |
| N  | -1.28368700 | 1.55440700  | -0.37132100 |
| Ir | -0.44161700 | -0.29414000 | -0.24666400 |
| Cl | -0.66439900 | -0.52057900 | -2.67681900 |
| C  | -0.40489000 | -0.24216500 | 1.70278100  |
| C  | 0.44442100  | 0.32724000  | 2.72090800  |
| C  | -1.48969400 | -0.93498300 | 2.30659300  |
| C  | -0.02635200 | 0.04644600  | 4.02898800  |
| C  | 1.61852400  | 1.08970700  | 2.58949800  |
| S  | -1.49947600 | -0.90581800 | 4.01451300  |
| C  | -2.45881200 | -1.58157500 | 1.45819200  |
| C  | 0.62672900  | 0.49235500  | 5.17149700  |
| C  | 2.28031200  | 1.53987100  | 3.72665300  |
| H  | 2.00795800  | 1.32955800  | 1.60217500  |
| C  | -3.57711200 | -2.30806600 | 1.87447500  |
| N  | -2.17511700 | -1.42181300 | 0.13631600  |
| C  | 1.79130100  | 1.24490900  | 5.00438400  |
| H  | 0.24511900  | 0.26411000  | 6.16834400  |
| H  | 3.19186800  | 2.13102900  | 3.61826500  |
| C  | -4.40910900 | -2.86885600 | 0.91585500  |
| H  | -3.78703000 | -2.43049000 | 2.93794300  |
| C  | -2.96889400 | -1.96147900 | -0.78659900 |
| H  | 2.32360600  | 1.60682600  | 5.88672700  |

|   |             |             |             |
|---|-------------|-------------|-------------|
| C | -4.10131400 | -2.69057000 | -0.43282300 |
| H | -5.28665400 | -3.44542800 | 1.21365100  |
| H | -2.67119700 | -1.79701500 | -1.82623900 |
| C | 4.72776800  | 3.05651200  | -1.18475200 |
| C | -2.50746400 | 5.71834600  | -0.58067600 |
| C | 4.30248000  | -4.55895800 | -0.53303200 |
| C | -1.80676400 | 6.49344500  | 0.54683100  |
| H | -2.08490600 | 6.09084400  | 1.53316600  |
| H | -0.71119800 | 6.44645100  | 0.45691300  |
| H | -2.10046600 | 7.55455400  | 0.51483500  |
| C | -2.08792700 | 6.29566700  | -1.94197600 |
| H | -2.38743600 | 7.35330000  | -2.01179000 |
| H | -0.99894500 | 6.24619500  | -2.09072000 |
| H | -2.56935800 | 5.74820500  | -2.76701800 |
| C | -4.01992900 | 5.88999400  | -0.42365500 |
| H | -4.57564800 | 5.37059600  | -1.21931900 |
| H | -4.37591900 | 5.51625700  | 0.54860400  |
| H | -4.27700600 | 6.95828600  | -0.48242600 |
| C | 4.47295300  | 4.56098900  | -1.28669600 |
| H | 5.42944400  | 5.08823900  | -1.41921100 |
| H | 3.83449500  | 4.81027000  | -2.14816900 |
| H | 3.99913300  | 4.95897400  | -0.37621400 |
| C | 5.64074500  | 2.79502400  | 0.02493600  |
| H | 5.15610500  | 3.11959900  | 0.95914000  |
| H | 5.89486700  | 1.72922800  | 0.12723700  |
| H | 6.58374000  | 3.35326200  | -0.08464200 |
| C | 5.42726100  | 2.59069000  | -2.47180500 |
| H | 6.36586000  | 3.14886400  | -2.61361300 |
| H | 5.68026700  | 1.52032800  | -2.44230000 |
| H | 4.78832100  | 2.76517200  | -3.35125200 |
| C | 5.32805600  | -4.16577000 | 0.54278400  |
| H | 5.70143600  | -3.14027000 | 0.40420900  |
| H | 4.89069600  | -4.23767300 | 1.55037600  |
| H | 6.19374900  | -4.84411700 | 0.49572200  |
| C | 3.88756300  | -6.01409400 | -0.31033200 |
| H | 3.17143500  | -6.35776400 | -1.07228100 |
| H | 4.77469600  | -6.66115300 | -0.37492500 |
| H | 3.43879200  | -6.16459700 | 0.68351200  |
| C | 4.93581300  | -4.43072100 | -1.92835200 |
| H | 5.79847000  | -5.10991100 | -2.00867500 |
| H | 4.21412900  | -4.69817200 | -2.71529600 |
| H | 5.29467400  | -3.40977000 | -2.12647000 |
| C | -4.99821700 | -3.23977500 | -1.51073900 |
| F | -5.97879600 | -2.38114100 | -1.80387900 |



|   |             |             |             |
|---|-------------|-------------|-------------|
| F | -4.32226300 | -3.47334200 | -2.63578000 |
| F | -5.57020600 | -4.38110400 | -1.12661600 |

Structure of Ir4, T<sub>2</sub> state

|    |             |             |             |
|----|-------------|-------------|-------------|
| C  | -2.72503800 | 2.88079600  | -0.65548300 |
| C  | -1.86944100 | 1.77669200  | -0.59173200 |
| C  | -0.05103800 | 3.20949400  | -0.22615600 |
| C  | -0.86308900 | 4.33048900  | -0.28508300 |
| C  | -2.24671400 | 4.18215600  | -0.50490900 |
| H  | -3.78658900 | 2.70060600  | -0.82655400 |
| H  | 1.02307300  | 3.30128600  | -0.05356000 |
| H  | -0.40148400 | 5.30758700  | -0.15694300 |
| C  | -2.29974000 | 0.39823300  | -0.73282000 |
| C  | -3.59975700 | -0.09320500 | -0.92245700 |
| C  | -3.82532400 | -1.48767700 | -0.99445000 |
| H  | -4.43031700 | 0.60645400  | -0.99521500 |
| C  | -1.43553300 | -1.84585900 | -0.71631800 |
| C  | -2.73298800 | -2.36265000 | -0.90356700 |
| H  | -2.87054800 | -3.43909600 | -0.96115800 |
| C  | -0.19484500 | -2.57847200 | -0.56878400 |
| C  | -0.08985700 | -3.97287600 | -0.62580100 |
| C  | 2.11290700  | -2.42079000 | -0.20424200 |
| C  | 1.13863500  | -4.61681000 | -0.47164800 |
| H  | -0.99789900 | -4.55180700 | -0.79487900 |
| C  | 2.26254300  | -3.79961000 | -0.25585700 |
| H  | 2.97205100  | -1.76846900 | -0.03582400 |
| H  | 3.26029000  | -4.21393100 | -0.12539200 |
| N  | -0.52355200 | 1.97063900  | -0.37462700 |
| N  | -1.28338900 | -0.49673700 | -0.62460800 |
| N  | 0.93359700  | -1.82047900 | -0.35526200 |
| Ir | 0.49852900  | 0.19178000  | -0.29746800 |
| Cl | 0.90680900  | 0.32779200  | -2.68406800 |
| C  | 0.40930500  | 0.17028700  | 1.68297200  |
| C  | -0.57780300 | -0.18851000 | 2.66912900  |
| C  | 1.58405900  | 0.61864500  | 2.30628000  |
| C  | -0.09892500 | 0.00381100  | 3.99309200  |
| C  | -1.88666500 | -0.68212600 | 2.50672500  |
| S  | 1.53512700  | 0.61797200  | 4.02455000  |
| C  | 2.69164700  | 1.03595900  | 1.48679700  |
| C  | -0.87336500 | -0.27737900 | 5.11527200  |
| C  | -2.66490100 | -0.96483600 | 3.62336900  |
| H  | -2.29777500 | -0.84508400 | 1.51355300  |
| C  | 3.92594400  | 1.51143200  | 1.94051200  |
| N  | 2.42739600  | 0.92930700  | 0.15565400  |

|   |             |             |             |
|---|-------------|-------------|-------------|
| C | -2.16517800 | -0.76469200 | 4.91605400  |
| H | -0.48276500 | -0.12214000 | 6.12271400  |
| H | -3.67848000 | -1.34715700 | 3.48619300  |
| C | 4.89133000  | 1.87316300  | 1.01497900  |
| H | 4.11770300  | 1.59642400  | 3.01085200  |
| C | 3.35609300  | 1.27599400  | -0.73759300 |
| H | -2.79038200 | -0.99160000 | 5.78223700  |
| C | 4.60191000  | 1.75065200  | -0.34550000 |
| H | 5.85983300  | 2.25324300  | 1.34559200  |
| H | 3.07458400  | 1.16944400  | -1.78810700 |
| C | -5.25828500 | -1.99484400 | -1.14191400 |
| C | 1.21742000  | -6.13947900 | -0.53814300 |
| C | -3.20850500 | 5.36489300  | -0.58010900 |
| C | 0.33496100  | -6.72950100 | 0.57394700  |
| H | 0.67799100  | -6.39934700 | 1.56653200  |
| H | -0.71957100 | -6.43667500 | 0.46214400  |
| H | 0.38166300  | -7.82912300 | 0.54342700  |
| C | 0.70379300  | -6.60419100 | -1.91061500 |
| H | 0.75658000  | -7.70197600 | -1.97620000 |
| H | -0.34231600 | -6.30961600 | -2.08139500 |
| H | 1.31446800  | -6.18255300 | -2.72369800 |
| C | 2.64856500  | -6.64606600 | -0.35151000 |
| H | 3.32223400  | -6.26806000 | -1.13566900 |
| H | 3.05984300  | -6.36000000 | 0.62860100  |
| H | 2.65839400  | -7.74468200 | -0.40716500 |
| C | -5.32564000 | -3.52017400 | -1.23655500 |
| H | -6.37386200 | -3.83515800 | -1.34722800 |
| H | -4.77038300 | -3.90051500 | -2.10757200 |
| H | -4.92850700 | -4.00505500 | -0.33177500 |
| C | -6.06236000 | -1.54397100 | 0.08972200  |
| H | -5.62171900 | -1.94744100 | 1.01499000  |
| H | -6.09742800 | -0.44815400 | 0.17999100  |
| H | -7.09904000 | -1.90821500 | 0.01597300  |
| C | -5.87963400 | -1.39834500 | -2.41509300 |
| H | -6.91462100 | -1.75650900 | -2.52918900 |
| H | -5.90942500 | -0.29919000 | -2.38696900 |
| H | -5.31199900 | -1.70132400 | -3.30842700 |
| C | -4.27364100 | 5.20982300  | 0.51761300  |
| H | -4.85956400 | 4.28662400  | 0.39635800  |
| H | -3.81095600 | 5.19198200  | 1.51638800  |
| H | -4.97508900 | 6.05770600  | 0.48002900  |
| C | -2.48879200 | 6.69990700  | -0.38095100 |
| H | -1.72774800 | 6.87468500  | -1.15674200 |
| H | -3.21762800 | 7.52177600  | -0.44067100 |

|   |             |            |             |
|---|-------------|------------|-------------|
| H | -2.00149000 | 6.75933600 | 0.60427400  |
| C | -3.88327400 | 5.36873900 | -1.96156000 |
| H | -4.58005400 | 6.21819600 | -2.03470600 |
| H | -3.13688500 | 5.46768800 | -2.76466400 |
| H | -4.45833300 | 4.44833700 | -2.14193600 |
| C | 5.63508500  | 2.09572800 | -1.38380200 |
| F | 6.33070800  | 3.17690900 | -1.02735500 |
| F | 5.07840300  | 2.33566700 | -2.57101400 |
| F | 6.50956400  | 1.09812400 | -1.54471900 |

Structure of Ir5, S<sub>0</sub> state

|    |             |             |             |
|----|-------------|-------------|-------------|
| C  | -1.77563800 | 1.54468800  | 3.59636600  |
| C  | -1.39473200 | 1.32480900  | 2.27708700  |
| C  | 0.65881400  | 0.44989600  | 2.97124300  |
| C  | 0.33287400  | 0.64591900  | 4.30898300  |
| C  | -0.90174100 | 1.20240300  | 4.62541300  |
| H  | -2.75050700 | 1.97813100  | 3.81947900  |
| H  | 1.61364600  | 0.01520400  | 2.67148100  |
| H  | 1.04667000  | 0.36064600  | 5.08250000  |
| H  | -1.18882100 | 1.36835500  | 5.66524700  |
| C  | -2.24263700 | 1.63880800  | 1.11239000  |
| C  | -3.50683900 | 2.22540900  | 1.10929700  |
| C  | -4.13767600 | 2.44281000  | -0.11551800 |
| H  | -3.99351000 | 2.51256100  | 2.04089800  |
| C  | -2.25016900 | 1.50798500  | -1.25999500 |
| C  | -3.51407400 | 2.09338900  | -1.31318400 |
| H  | -5.12818800 | 2.89986700  | -0.13729700 |
| H  | -4.00599600 | 2.27834100  | -2.26764100 |
| C  | -1.41073300 | 1.06583200  | -2.38887900 |
| C  | -1.80339300 | 1.13358300  | -3.72145500 |
| C  | 0.63707600  | 0.11638800  | -2.99717800 |
| C  | -0.93818900 | 0.67634900  | -4.71245200 |
| H  | -2.78097900 | 1.53770900  | -3.98397300 |
| C  | 0.29946800  | 0.15914500  | -4.34561600 |
| H  | 1.59453100  | -0.28204600 | -2.65840700 |
| H  | -1.23449600 | 0.72264200  | -5.76185500 |
| H  | 1.00643500  | -0.21298400 | -5.08788300 |
| N  | -0.17722300 | 0.78295100  | 1.98528800  |
| N  | -1.68431200 | 1.29170000  | -0.06000600 |
| N  | -0.19029700 | 0.56007700  | -2.04823800 |
| Ir | 0.12793500  | 0.55964800  | -0.02591600 |
| Cl | 0.91452100  | 2.88568700  | -0.15142500 |
| C  | -0.30501000 | -1.40636600 | 0.07780700  |
| C  | -1.50552900 | -2.20228200 | 0.11513000  |

|    |             |             |             |
|----|-------------|-------------|-------------|
| C  | 0.81598600  | -2.21184100 | 0.11279900  |
| C  | -1.22237500 | -3.59587800 | 0.17773500  |
| C  | -2.85773300 | -1.80361700 | 0.10037200  |
| S  | 0.48635400  | -3.92373200 | 0.18989200  |
| C  | 2.11780300  | -1.60026900 | 0.07869800  |
| C  | -2.23759100 | -4.55678100 | 0.22270000  |
| C  | -3.86480900 | -2.75426400 | 0.14458200  |
| H  | -3.11559700 | -0.74651100 | 0.05493700  |
| C  | 3.35618400  | -2.25299100 | 0.10783000  |
| N  | 2.06019400  | -0.24077800 | 0.00907000  |
| C  | -3.55725100 | -4.12510200 | 0.20524500  |
| H  | -1.99740800 | -5.62108900 | 0.27002400  |
| H  | -4.90933700 | -2.43506900 | 0.13253700  |
| C  | 4.52532900  | -1.51125800 | 0.06602400  |
| H  | 3.39303100  | -3.34203600 | 0.16324200  |
| C  | 3.18251500  | 0.48601100  | -0.03168500 |
| H  | -4.36401800 | -4.86104600 | 0.23917200  |
| C  | 4.43336400  | -0.11854800 | -0.00499700 |
| H  | 5.50142300  | -1.99868600 | 0.08807800  |
| H  | 3.05427500  | 1.57029700  | -0.08568300 |
| Cl | 5.84829600  | 0.86369800  | -0.06050800 |

#### Structure of Ir5, S<sub>1</sub> state

|   |             |             |             |
|---|-------------|-------------|-------------|
| C | -1.79470400 | 1.33269400  | 3.68351200  |
| C | -1.42215200 | 1.19171200  | 2.33762000  |
| C | 0.68284300  | 0.36293000  | 3.00568200  |
| C | 0.36136800  | 0.49034100  | 4.34262300  |
| C | -0.90906000 | 0.98597000  | 4.68625700  |
| H | -2.78563600 | 1.71664300  | 3.92772700  |
| H | 1.65473900  | -0.01866400 | 2.68795300  |
| H | 1.09044100  | 0.20810800  | 5.10241100  |
| H | -1.19614700 | 1.09644600  | 5.73354400  |
| C | -2.26565300 | 1.52576700  | 1.20800300  |
| C | -3.54683200 | 2.06609700  | 1.21802100  |
| C | -4.18920500 | 2.32266700  | -0.00072800 |
| H | -4.04531600 | 2.29450300  | 2.16039500  |
| C | -2.26701000 | 1.52240000  | -1.20972000 |
| C | -3.54850100 | 2.06277400  | -1.21922600 |
| H | -5.19427400 | 2.74599700  | -0.00065900 |
| H | -4.04822200 | 2.28858000  | -2.16159000 |
| C | -1.42512900 | 1.18527800  | -2.33908000 |
| C | -1.79913900 | 1.32228700  | -3.68519600 |
| C | 0.67937200  | 0.35464500  | -3.00741600 |
| C | -0.91467600 | 0.97282600  | -4.68783600 |

|    |             |             |             |
|----|-------------|-------------|-------------|
| H  | -2.79042000 | 1.70536700  | -3.92939400 |
| C  | 0.35640500  | 0.47824700  | -4.34427600 |
| H  | 1.65165800  | -0.02598100 | -2.68970000 |
| H  | -1.20297200 | 1.08024700  | -5.73511100 |
| H  | 1.08462500  | 0.19400900  | -5.10412300 |
| N  | -0.17118400 | 0.69996900  | 2.02564600  |
| N  | -1.69726200 | 1.24335500  | -0.00065500 |
| N  | -0.17349800 | 0.69441100  | -2.02725700 |
| Ir | 0.12746500  | 0.54114300  | -0.00090000 |
| Cl | 0.90304800  | 2.86844200  | -0.00471500 |
| C  | -0.31597400 | -1.36057400 | 0.00181600  |
| C  | -1.51501600 | -2.16015300 | 0.00290600  |
| C  | 0.82932900  | -2.20898200 | 0.00296400  |
| C  | -1.23650700 | -3.55057800 | 0.00497500  |
| C  | -2.86169800 | -1.75522600 | 0.00220000  |
| S  | 0.48675600  | -3.88040100 | 0.00542800  |
| C  | 2.13530100  | -1.60438300 | 0.00174300  |
| C  | -2.23504600 | -4.51408000 | 0.00637000  |
| C  | -3.87157800 | -2.71304400 | 0.00356500  |
| H  | -3.11193300 | -0.69658700 | 0.00053400  |
| C  | 3.36441000  | -2.26926000 | 0.00269300  |
| N  | 2.07609200  | -0.24381000 | -0.00059300 |
| C  | -3.56356900 | -4.07672700 | 0.00563600  |
| H  | -1.99627900 | -5.57894900 | 0.00795800  |
| H  | -4.91530300 | -2.39357900 | 0.00298600  |
| C  | 4.53845900  | -1.53068100 | 0.00120400  |
| H  | 3.39825800  | -3.35976400 | 0.00458300  |
| C  | 3.19378100  | 0.47743200  | -0.00206300 |
| H  | -4.36750100 | -4.81580600 | 0.00668700  |
| C  | 4.44868300  | -0.13817700 | -0.00124500 |
| H  | 5.51238400  | -2.02202300 | 0.00191400  |
| H  | 3.07134700  | 1.56423900  | -0.00388300 |
| Cl | 5.85563600  | 0.84008300  | -0.00327400 |

Structure of Ir5, T<sub>1</sub> state

|   |             |             |             |
|---|-------------|-------------|-------------|
| C | -1.78580900 | -1.37804100 | -3.67468700 |
| C | -1.42012700 | -1.21538800 | -2.33093200 |
| C | 0.68842700  | -0.39942200 | -2.99842900 |
| C | 0.37468900  | -0.54932700 | -4.33527500 |
| C | -0.89251300 | -1.04839400 | -4.67788400 |
| H | -2.77559600 | -1.76507100 | -3.91835000 |
| H | 1.65825400  | -0.01318700 | -2.68006400 |
| H | 1.10843000  | -0.28007600 | -5.09542300 |
| H | -1.17326200 | -1.17576900 | -5.72507000 |
| C | -2.27090600 | -1.53410500 | -1.19822800 |

|    |             |             |             |
|----|-------------|-------------|-------------|
| C  | -3.54792100 | -2.07612500 | -1.20879300 |
| C  | -4.19587500 | -2.32095200 | 0.01442200  |
| H  | -4.04128400 | -2.31775600 | -2.15058600 |
| C  | -2.27401700 | -1.50769200 | 1.22119700  |
| C  | -3.55818000 | -2.05008800 | 1.22826500  |
| H  | -5.20056400 | -2.74557300 | 0.01583100  |
| H  | -4.05895200 | -2.26971500 | 2.17190200  |
| C  | -1.43334600 | -1.16869100 | 2.34384700  |
| C  | -1.80205300 | -1.30186900 | 3.69450700  |
| C  | 0.67759300  | -0.33817700 | 3.00740800  |
| C  | -0.91415900 | -0.95292800 | 4.69181000  |
| H  | -2.79320200 | -1.68289300 | 3.94285600  |
| C  | 0.35901700  | -0.46006200 | 4.34411800  |
| H  | 1.64918800  | 0.04119600  | 2.68579400  |
| H  | -1.19908100 | -1.05839000 | 5.74036800  |
| H  | 1.08956200  | -0.17602200 | 5.10184400  |
| N  | -0.17382800 | -0.71959200 | -2.01976200 |
| N  | -1.70426800 | -1.23319100 | 0.00653800  |
| N  | -0.17921700 | -0.67847400 | 2.02906700  |
| Ir | 0.11980600  | -0.53314500 | 0.00676200  |
| Cl | 0.89495400  | -2.86285300 | 0.02613100  |
| C  | -0.31137500 | 1.36833900  | -0.01307900 |
| C  | -1.50857700 | 2.17073500  | -0.01960500 |
| C  | 0.83782600  | 2.21193700  | -0.02398200 |
| C  | -1.22483000 | 3.56020000  | -0.03623100 |
| C  | -2.85604900 | 1.76837500  | -0.01076700 |
| S  | 0.50018500  | 3.88661000  | -0.04293900 |
| C  | 2.14080700  | 1.60307100  | -0.01584400 |
| C  | -2.22209300 | 4.52603100  | -0.04481300 |
| C  | -3.86264300 | 2.72780400  | -0.01926000 |
| H  | -3.10713200 | 0.70948500  | 0.00333100  |
| C  | 3.37292100  | 2.26319700  | -0.02419200 |
| N  | 2.07676200  | 0.24247600  | 0.00260700  |
| C  | -3.55031300 | 4.09173200  | -0.03624100 |
| H  | -1.98104700 | 5.59039700  | -0.05745200 |
| H  | -4.90752100 | 2.41182000  | -0.01228200 |
| C  | 4.54386700  | 1.51953700  | -0.01317700 |
| H  | 3.41118000  | 3.35348500  | -0.03908900 |
| C  | 3.19124500  | -0.48327300 | 0.01318200  |
| H  | -4.35285600 | 4.83257300  | -0.04256600 |
| C  | 4.44876600  | 0.12742400  | 0.00586900  |
| H  | 5.51982300  | 2.00692700  | -0.01914600 |
| H  | 3.06454800  | -1.56954700 | 0.02733600  |
| Cl | 5.85205200  | -0.85638600 | 0.02026400  |

Structure of Ir5, T<sub>2</sub> state

|    |             |             |             |
|----|-------------|-------------|-------------|
| C  | 1.79142400  | -1.32629400 | 3.70170000  |
| C  | 1.42149700  | -1.19329200 | 2.35419700  |
| C  | -0.67972800 | -0.35385900 | 2.99324200  |
| C  | -0.36266800 | -0.46898200 | 4.34101900  |
| C  | 0.89674200  | -0.96474600 | 4.69562700  |
| H  | 2.78003300  | -1.70948200 | 3.95500400  |
| H  | -1.64779400 | 0.02849700  | 2.66512800  |
| H  | -1.09469700 | -0.17317500 | 5.09274400  |
| H  | 1.17673900  | -1.06531400 | 5.74583900  |
| C  | 2.26536900  | -1.52813300 | 1.23110200  |
| C  | 3.54762600  | -2.05912500 | 1.23012100  |
| C  | 4.19167700  | -2.31660400 | -0.00115900 |
| H  | 4.05478300  | -2.28152100 | 2.16896100  |
| C  | 2.26539600  | -1.52679900 | -1.23258800 |
| C  | 3.54767700  | -2.05780600 | -1.23213500 |
| H  | 5.19935000  | -2.73288700 | -0.00136500 |
| H  | 4.05484300  | -2.27919600 | -2.17120900 |
| C  | 1.42156800  | -1.19077800 | -2.35531500 |
| C  | 1.79154700  | -1.32230900 | -3.70296500 |
| C  | -0.67967000 | -0.35072400 | -2.99353500 |
| C  | 0.89689000  | -0.95972800 | -4.69652700 |
| H  | 2.78018800  | -1.70517200 | -3.95664000 |
| C  | -0.36255900 | -0.46439100 | -4.34142900 |
| H  | -1.64775400 | 0.03126800  | -2.66504700 |
| H  | 1.17692900  | -1.05914900 | -5.74683700 |
| H  | -1.09457100 | -0.16779500 | -5.09285900 |
| N  | 0.17631300  | -0.70658900 | 2.03213500  |
| N  | 1.67039900  | -1.25337500 | -0.00058200 |
| N  | 0.17633800  | -0.70446000 | -2.03277800 |
| Ir | -0.10772900 | -0.59244300 | -0.00026800 |
| Cl | -1.06219100 | -2.82268600 | -0.00145000 |
| C  | 0.30804300  | 1.38592600  | 0.00071600  |
| C  | 1.52816300  | 2.15186700  | 0.00107700  |
| C  | -0.79828100 | 2.20451400  | 0.00107300  |
| C  | 1.26414800  | 3.55091900  | 0.00176400  |
| C  | 2.87342700  | 1.73297600  | 0.00084500  |
| S  | -0.43765600 | 3.90809900  | 0.00192600  |
| C  | -2.11043700 | 1.61519700  | 0.00075100  |
| C  | 2.29317200  | 4.49781200  | 0.00221300  |
| C  | 3.89298400  | 2.67050000  | 0.00129400  |
| H  | 3.11598800  | 0.67188100  | 0.00031700  |
| C  | -3.32907600 | 2.30248500  | 0.00103900  |

|    |             |             |             |
|----|-------------|-------------|-------------|
| N  | -2.08139900 | 0.25504300  | 0.00012200  |
| C  | 3.60591900  | 4.04699400  | 0.00197600  |
| H  | 2.06694800  | 5.56613000  | 0.00273100  |
| H  | 4.93235100  | 2.33515900  | 0.00111300  |
| C  | -4.51765500 | 1.59195900  | 0.00068000  |
| H  | -3.33541800 | 3.39341000  | 0.00154900  |
| C  | -3.22439100 | -0.43992900 | -0.00022700 |
| H  | 4.42329500  | 4.77175900  | 0.00231800  |
| C  | -4.46014600 | 0.19644100  | 0.00003900  |
| H  | -5.48064600 | 2.10521600  | 0.00089300  |
| H  | -3.13595300 | -1.52818500 | -0.00072800 |
| Cl | -5.89607500 | -0.75330300 | -0.00042900 |

#### Structure of Ir6, S<sub>0</sub> state

|    |             |             |             |
|----|-------------|-------------|-------------|
| C  | 1.81441500  | -1.08548200 | 3.67522700  |
| C  | 1.41219700  | -1.00917300 | 2.34608500  |
| C  | -0.75033000 | -0.39949500 | 2.99132500  |
| C  | -0.40607800 | -0.45911200 | 4.33749100  |
| C  | 0.89472100  | -0.80855900 | 4.68378000  |
| H  | 2.84103300  | -1.35652100 | 3.92119200  |
| H  | -1.75701300 | -0.13013500 | 2.66803100  |
| H  | -1.15758300 | -0.23150800 | 5.09423300  |
| H  | 1.19737000  | -0.86401500 | 5.73093000  |
| C  | 2.30337500  | -1.26957200 | 1.20055800  |
| C  | 3.64200800  | -1.65650300 | 1.23055200  |
| C  | 4.30605600  | -1.85319900 | 0.01986600  |
| H  | 4.16109500  | -1.80479300 | 2.17711700  |
| C  | 2.30491300  | -1.29349500 | -1.17525500 |
| C  | 3.64369100  | -1.68064500 | -1.19543000 |
| H  | 5.35518800  | -2.15287400 | 0.02350700  |
| H  | 4.16446300  | -1.84744200 | -2.13794000 |
| C  | 1.41514300  | -1.05565300 | -2.32688400 |
| C  | 1.81835300  | -1.15944400 | -3.65391300 |
| C  | -0.74574800 | -0.45501800 | -2.98629700 |
| C  | 0.90006600  | -0.90088200 | -4.66862500 |
| H  | 2.84449800  | -1.43767300 | -3.89388100 |
| C  | -0.40028000 | -0.54177700 | -4.33066500 |
| H  | -1.75221600 | -0.17742700 | -2.66930700 |
| H  | 1.20351900  | -0.97793400 | -5.71417600 |
| H  | -1.15056400 | -0.32757000 | -5.09251200 |
| N  | 0.13023200  | -0.67067500 | 2.02543300  |
| N  | 1.70573700  | -1.08798100 | 0.01032900  |
| N  | 0.13334100  | -0.70887900 | -2.01435700 |
| Ir | -0.19279100 | -0.62354200 | 0.00471300  |



|    |             |             |             |
|----|-------------|-------------|-------------|
| Cl | -0.64360000 | -3.04073900 | 0.02706800  |
| C  | -0.04052900 | 1.38808700  | -0.01314700 |
| C  | 1.03608000  | 2.34607000  | -0.02061000 |
| C  | -1.26314700 | 2.02682400  | -0.01887600 |
| C  | 0.55902200  | 3.68717000  | -0.03166000 |
| C  | 2.43092300  | 2.14197100  | -0.01851500 |
| S  | -1.17934300 | 3.76957500  | -0.03309500 |
| C  | -2.46756600 | 1.23587600  | -0.01216700 |
| C  | 1.42833300  | 4.78283000  | -0.04014500 |
| C  | 3.29368800  | 3.22637700  | -0.02697700 |
| H  | 2.83550900  | 1.13076500  | -0.01044900 |
| C  | -3.78487900 | 1.71063800  | -0.01621200 |
| N  | -2.21835500 | -0.10250800 | -0.00051800 |
| C  | 2.79586300  | 4.54136900  | -0.03766500 |
| H  | 1.04053300  | 5.80390700  | -0.04847100 |
| H  | 4.37285200  | 3.05746200  | -0.02530900 |
| C  | -4.84011700 | 0.81182900  | -0.00806900 |
| H  | -3.97208400 | 2.78540500  | -0.02561100 |
| C  | -3.22758000 | -0.98170000 | 0.00746300  |
| H  | 3.49066500  | 5.38449200  | -0.04416300 |
| C  | -4.54321600 | -0.54754100 | 0.00395100  |
| H  | -5.87945400 | 1.14525700  | -0.01076800 |
| H  | -2.96187000 | -2.04217400 | 0.01683600  |
| F  | -5.51703400 | -1.44728900 | 0.01221300  |

#### Structure of Ir6, S<sub>1</sub> state

|   |             |             |             |
|---|-------------|-------------|-------------|
| C | 1.81474300  | -1.12790600 | 3.68213300  |
| C | 1.42511800  | -1.04060200 | 2.33647000  |
| C | -0.76692900 | -0.48299500 | 3.00596200  |
| C | -0.42949000 | -0.56229200 | 4.34268400  |
| C | 0.89391100  | -0.89237200 | 4.68547200  |
| H | 2.84706000  | -1.38112800 | 3.92556400  |
| H | -1.77960400 | -0.22821900 | 2.68837100  |
| H | -1.18682900 | -0.37015900 | 5.10295100  |
| H | 1.19443900  | -0.96119000 | 5.73255600  |
| C | 2.30331500  | -1.26465800 | 1.20614900  |
| C | 3.64277300  | -1.63797800 | 1.21508900  |
| C | 4.31176600  | -1.81029300 | -0.00409300 |
| H | 4.16648400  | -1.80224600 | 2.15717400  |
| C | 2.30271700  | -1.25987600 | -1.21139000 |
| C | 3.64240200  | -1.63319800 | -1.22206200 |
| H | 5.36233500  | -2.10300600 | -0.00485400 |
| H | 4.16576400  | -1.79378500 | -2.16499000 |
| C | 1.42427900  | -1.03150200 | -2.34023600 |

|    |             |             |             |
|----|-------------|-------------|-------------|
| C  | 1.81338600  | -1.11348500 | -3.68655200 |
| C  | -0.76826200 | -0.47176100 | -3.00698900 |
| C  | 0.89222000  | -0.87435600 | -4.68858100 |
| H  | 2.84570000  | -1.36546500 | -3.93128800 |
| C  | -0.43131200 | -0.54592500 | -4.34406700 |
| H  | -1.78090600 | -0.21841400 | -2.68813400 |
| H  | 1.19240300  | -0.93902400 | -5.73602800 |
| H  | -1.18897400 | -0.35118600 | -5.10334100 |
| N  | 0.12076200  | -0.71513600 | 2.02538000  |
| N  | 1.70301100  | -1.05543300 | -0.00196400 |
| N  | 0.11976700  | -0.70738100 | -2.02751100 |
| Ir | -0.19877900 | -0.60021700 | -0.00087900 |
| Cl | -0.66045400 | -3.01062800 | -0.00563800 |
| C  | -0.01376200 | 1.34392700  | 0.00248400  |
| C  | 1.06713800  | 2.29665200  | 0.00378400  |
| C  | -1.26256400 | 2.03059600  | 0.00396300  |
| C  | 0.60543900  | 3.63744600  | 0.00640100  |
| C  | 2.45565300  | 2.07416200  | 0.00285900  |
| S  | -1.14743500 | 3.73279200  | 0.00715800  |
| C  | -2.47594200 | 1.25541100  | 0.00261600  |
| C  | 1.46694500  | 4.72521100  | 0.00812000  |
| C  | 3.32903700  | 3.15772700  | 0.00454000  |
| H  | 2.84365900  | 1.05786000  | 0.00085200  |
| C  | -3.78315200 | 1.75144700  | 0.00340800  |
| N  | -2.23376700 | -0.08453200 | 0.00022900  |
| C  | 2.84202500  | 4.46817800  | 0.00714500  |
| H  | 1.08975100  | 5.74949300  | 0.01015200  |
| H  | 4.40600600  | 2.98016400  | 0.00381100  |
| C  | -4.84933800 | 0.86392300  | 0.00175000  |
| H  | -3.96020700 | 2.82791100  | 0.00534500  |
| C  | -3.24489900 | -0.94947300 | -0.00131700 |
| H  | 3.54045400  | 5.30765800  | 0.00843300  |
| C  | -4.56260400 | -0.49584800 | -0.00062300 |
| H  | -5.88498500 | 1.20725200  | 0.00227900  |
| H  | -2.99237500 | -2.01380100 | -0.00305200 |
| F  | -5.53595600 | -1.38373700 | -0.00227100 |

Structure of Ir6, T<sub>1</sub> state

|   |             |             |            |
|---|-------------|-------------|------------|
| C | 1.81699200  | -1.13082000 | 3.68435600 |
| C | 1.43249900  | -1.03578000 | 2.33707800 |
| C | -0.76573400 | -0.49200500 | 3.00309600 |
| C | -0.43318600 | -0.58062300 | 4.33990200 |
| C | 0.89074700  | -0.90730700 | 4.68487100 |
| H | 2.84939100  | -1.38136100 | 3.93023100 |

|    |             |             |             |
|----|-------------|-------------|-------------|
| H  | -1.77798700 | -0.23886000 | 2.68281300  |
| H  | -1.19402800 | -0.39764200 | 5.09901700  |
| H  | 1.18727400  | -0.98279800 | 5.73276300  |
| C  | 2.31367900  | -1.25081400 | 1.20898200  |
| C  | 3.65393200  | -1.62116200 | 1.21734900  |
| C  | 4.32490100  | -1.79251700 | -0.00134300 |
| H  | 4.17674000  | -1.78587700 | 2.16006600  |
| C  | 2.31327900  | -1.24992300 | -1.21062500 |
| C  | 3.65353700  | -1.62026100 | -1.21967200 |
| H  | 5.37629500  | -2.08277500 | -0.00163000 |
| H  | 4.17604400  | -1.78433700 | -2.16267100 |
| C  | 1.43166000  | -1.03430900 | -2.33823600 |
| C  | 1.81559500  | -1.12858600 | -3.68573100 |
| C  | -0.76693200 | -0.49045100 | -3.00305400 |
| C  | 0.88891400  | -0.90460400 | -4.68573500 |
| H  | 2.84789900  | -1.37895500 | -3.93218800 |
| C  | -0.43491900 | -0.57823700 | -4.34004600 |
| H  | -1.77908800 | -0.23762900 | -2.68220700 |
| H  | 1.18500700  | -0.97954200 | -5.73378900 |
| H  | -1.19609300 | -0.39488400 | -5.09873800 |
| N  | 0.12797900  | -0.71291200 | 2.02429500  |
| N  | 1.71261200  | -1.03831100 | -0.00063900 |
| N  | 0.12720000  | -0.71183900 | -2.02474500 |
| Ir | -0.18972400 | -0.59184100 | -0.00013100 |
| Cl | -0.64204900 | -3.00642900 | -0.00042400 |
| C  | -0.02387000 | 1.35109700  | 0.00036100  |
| C  | 1.05137200  | 2.31038200  | 0.00072200  |
| C  | -1.27831100 | 2.02798700  | 0.00040900  |
| C  | 0.57966300  | 3.64789000  | 0.00085600  |
| C  | 2.44113000  | 2.09568500  | 0.00086700  |
| S  | -1.17481300 | 3.73315400  | 0.00062200  |
| C  | -2.48548200 | 1.24453000  | 0.00045000  |
| C  | 1.43546300  | 4.74113500  | 0.00114200  |
| C  | 3.30698700  | 3.18378400  | 0.00116600  |
| H  | 2.83382300  | 1.08058700  | 0.00068800  |
| C  | -3.79673700 | 1.73076800  | 0.00061600  |
| N  | -2.23360700 | -0.09387500 | 0.00036200  |
| C  | 2.81082000  | 4.49218400  | 0.00131800  |
| H  | 1.05210000  | 5.76325600  | 0.00124900  |
| H  | 4.38528300  | 3.01372800  | 0.00127500  |
| C  | -4.85597900 | 0.83471200  | 0.00072900  |
| H  | -3.98198400 | 2.80589100  | 0.00060500  |
| C  | -3.23781600 | -0.96661300 | 0.00045100  |
| H  | 3.50451100  | 5.33582600  | 0.00158200  |

|   |             |             |            |
|---|-------------|-------------|------------|
| C | -4.55906700 | -0.52295300 | 0.00064300 |
| H | -5.89429000 | 1.17014700  | 0.00082700 |
| H | -2.97712300 | -2.02907500 | 0.00029700 |
| F | -5.52569600 | -1.41841000 | 0.00074600 |

Structure of Ir6, T<sub>2</sub> state

|    |             |             |             |
|----|-------------|-------------|-------------|
| C  | -1.78918800 | -1.14715000 | -3.70283600 |
| C  | -1.40641400 | -1.05838900 | -2.35518700 |
| C  | 0.77505800  | -0.45702100 | -2.99373000 |
| C  | 0.44642200  | -0.53239100 | -4.34151500 |
| C  | -0.86007800 | -0.88565900 | -4.69650500 |
| H  | -2.81438300 | -1.41756800 | -3.95631500 |
| H  | 1.77964500  | -0.18474300 | -2.66539300 |
| H  | 1.20616200  | -0.31700600 | -5.09307700 |
| H  | -1.14962500 | -0.95279300 | -5.74680500 |
| C  | -2.28318700 | -1.29476000 | -1.23231900 |
| C  | -3.61785000 | -1.67486000 | -1.23164300 |
| C  | -4.28727000 | -1.85777700 | -0.00044000 |
| H  | -4.14715600 | -1.83626200 | -2.17073600 |
| C  | -2.28303400 | -1.29571200 | 1.23160500  |
| C  | -3.61775500 | -1.67575300 | 1.23075400  |
| H  | -5.33620100 | -2.15518200 | -0.00050100 |
| H  | -4.14698200 | -1.83775500 | 2.16978900  |
| C  | -1.40612800 | -1.06030600 | 2.35452000  |
| C  | -1.78868200 | -1.15024400 | 3.70217300  |
| C  | 0.77543100  | -0.45940600 | 2.99326700  |
| C  | -0.85944100 | -0.88954200 | 4.69591700  |
| H  | -2.81380800 | -1.42097400 | 3.95559900  |
| C  | 0.44699400  | -0.53589500 | 4.34103600  |
| H  | 1.77996000  | -0.18682400 | 2.66500700  |
| H  | -1.14882600 | -0.95759100 | 5.74620200  |
| H  | 1.20683300  | -0.32109300 | 5.09266600  |
| N  | -0.11399000 | -0.71655500 | -2.03281800 |
| N  | -1.66091200 | -1.08983700 | -0.00034100 |
| N  | -0.11373500 | -0.71818200 | 2.03226300  |
| Ir | 0.18225500  | -0.64180600 | -0.00026200 |
| Cl | 0.86560500  | -2.97063600 | -0.00127800 |
| C  | 0.00789500  | 1.37215400  | 0.00052700  |
| C  | -1.11225900 | 2.27843800  | 0.00090800  |
| C  | 1.20361900  | 2.05053800  | 0.00072000  |
| C  | -0.68286200 | 3.63568100  | 0.00137700  |
| C  | -2.49748900 | 2.02266600  | 0.00091100  |
| S  | 1.05011500  | 3.78508800  | 0.00134900  |
| C  | 2.43716000  | 1.30609100  | 0.00039400  |

|   |             |             |             |
|---|-------------|-------------|-------------|
| C | -1.59183000 | 4.69856100  | 0.00181900  |
| C | -3.39814100 | 3.07512200  | 0.00135400  |
| H | -2.86433800 | 0.99779200  | 0.00057100  |
| C | 3.72927200  | 1.84291900  | 0.00054600  |
| N | 2.24328500  | -0.03951700 | -0.00009800 |
| C | -2.94905000 | 4.40744600  | 0.00180000  |
| H | -1.24063600 | 5.73263500  | 0.00217400  |
| H | -4.47009100 | 2.86605000  | 0.00135600  |
| C | 4.82534400  | 0.99502700  | 0.00020300  |
| H | 3.86495200  | 2.92528400  | 0.00093300  |
| C | 3.29423300  | -0.86850500 | -0.00041800 |
| H | -3.67421500 | 5.22447500  | 0.00214300  |
| C | 4.58935500  | -0.37536200 | -0.00027900 |
| H | 5.84808600  | 1.37609700  | 0.00030100  |
| H | 3.08971500  | -1.94120100 | -0.00080600 |
| F | 5.59965400  | -1.23129800 | -0.00062000 |

Structure of Ir7, S<sub>0</sub> state

|   |             |             |             |
|---|-------------|-------------|-------------|
| C | 1.85011000  | -1.40871100 | 3.66363000  |
| C | 1.47302300  | -1.23887800 | 2.33581700  |
| C | -0.54378600 | -0.25452300 | 2.99026700  |
| C | -0.21991900 | -0.39595100 | 4.33538900  |
| C | 0.99370500  | -0.98327000 | 4.67621400  |
| H | 2.80816900  | -1.86846100 | 3.90588100  |
| H | -1.48365100 | 0.19844600  | 2.67140500  |
| H | -0.91922500 | -0.04598800 | 5.09546800  |
| H | 1.27779700  | -1.10957200 | 5.72241100  |
| C | 2.30527400  | -1.64054300 | 1.18680700  |
| C | 3.55107100  | -2.26494400 | 1.21160700  |
| C | 4.17013600  | -2.56542600 | -0.00160900 |
| H | 4.03329900  | -2.51614900 | 2.15583700  |
| C | 2.30564400  | -1.63842000 | -1.18892400 |
| C | 3.55144100  | -2.26277100 | -1.21447900 |
| H | 5.14718100  | -3.05110500 | -0.00189800 |
| H | 4.03395500  | -2.51230000 | -2.15901100 |
| C | 1.47372200  | -1.23469400 | -2.33744300 |
| C | 1.85116600  | -1.40209200 | -3.66545500 |
| C | -0.54291600 | -0.24913400 | -2.99062700 |
| C | 0.99502400  | -0.97482200 | -4.67748700 |
| H | 2.80931100  | -1.86136600 | -3.90826800 |
| C | -0.21869300 | -0.38812800 | -4.33591400 |
| H | -1.48286100 | 0.20325100  | -2.67118900 |
| H | 1.27940300  | -1.09921100 | -5.72383600 |
| H | -0.91779500 | -0.03678100 | -5.09554200 |

|    |             |             |             |
|----|-------------|-------------|-------------|
| N  | 0.27527400  | -0.66714200 | 2.02038900  |
| N  | 1.75320500  | -1.33845200 | -0.00087200 |
| N  | 0.27589200  | -0.66353900 | -2.02128200 |
| Ir | -0.03072200 | -0.53776500 | -0.00043500 |
| Cl | -0.90303500 | -2.83357300 | -0.00271500 |
| C  | 0.47493500  | 1.41171100  | 0.00128200  |
| C  | 1.70414500  | 2.16154900  | 0.00185200  |
| C  | -0.61547600 | 2.26332400  | 0.00179100  |
| C  | 1.47525500  | 3.56663200  | 0.00283000  |
| C  | 3.03941800  | 1.70848900  | 0.00161900  |
| S  | -0.21829200 | 3.96326500  | 0.00307900  |
| C  | -1.93620700 | 1.70426800  | 0.00120100  |
| C  | 2.52795200  | 4.48755600  | 0.00351000  |
| C  | 4.08292400  | 2.61933400  | 0.00230300  |
| H  | 3.25407800  | 0.64092200  | 0.00091500  |
| C  | -3.14692400 | 2.41012900  | 0.00178900  |
| N  | -1.93044000 | 0.33711100  | 0.00003300  |
| C  | 3.82895700  | 4.00277300  | 0.00323500  |
| H  | 2.33028800  | 5.56161500  | 0.00424200  |
| H  | 5.11417500  | 2.25957300  | 0.00212200  |
| C  | -4.34139300 | 1.71188800  | 0.00115200  |
| H  | -3.13411700 | 3.50094700  | 0.00276500  |
| C  | -3.08225500 | -0.33521100 | -0.00056400 |
| H  | 4.66435400  | 4.70688400  | 0.00376800  |
| C  | -4.31590000 | 0.30991700  | -0.00004300 |
| H  | -5.29547700 | 2.24103100  | 0.00158500  |
| H  | -3.00854000 | -1.42600000 | -0.00150300 |
| C  | -5.53775700 | -0.53258200 | -0.00075900 |
| O  | -5.52295400 | -1.74069900 | -0.00149900 |
| O  | -6.65507300 | 0.19067600  | -0.00045600 |
| H  | -7.40986000 | -0.41979700 | -0.00089600 |

Structure of Ir7, S<sub>1</sub> state

|   |             |             |            |
|---|-------------|-------------|------------|
| C | 1.86504700  | -1.37791300 | 3.68477400 |
| C | 1.49792600  | -1.22448100 | 2.33859700 |
| C | -0.57378700 | -0.31408400 | 3.00659500 |
| C | -0.25669800 | -0.45151600 | 4.34344400 |
| C | 0.99381800  | -0.99580200 | 4.68714100 |
| H | 2.84029500  | -1.79980900 | 3.92947500 |
| H | -1.53028900 | 0.10395800  | 2.68826000 |
| H | -0.97378700 | -0.14001800 | 5.10318300 |
| H | 1.27676900  | -1.11599800 | 5.73448400 |
| C | 2.32736500  | -1.59186500 | 1.20931700 |
| C | 3.58646800  | -2.18234300 | 1.21913200 |

|    |             |             |             |
|----|-------------|-------------|-------------|
| C  | 4.21718100  | -2.46602200 | 0.00056500  |
| H  | 4.07626200  | -2.42917900 | 2.16141300  |
| C  | 2.32698100  | -1.59314000 | -1.20843900 |
| C  | 3.58601900  | -2.18360600 | -1.21815200 |
| H  | 5.20465400  | -2.92889800 | 0.00063400  |
| H  | 4.07548500  | -2.43140900 | -2.16034700 |
| C  | 1.49708100  | -1.22698200 | -2.33789600 |
| C  | 1.86378900  | -1.38183500 | -3.68397700 |
| C  | -0.57486200 | -0.31743600 | -3.00612900 |
| C  | 0.99218600  | -1.00084400 | -4.68648700 |
| H  | 2.83898900  | -1.80391400 | -3.92854500 |
| C  | -0.25821100 | -0.45629500 | -4.34295100 |
| H  | -1.53127400 | 0.10090000  | -2.68791500 |
| H  | 1.27480000  | -1.12213400 | -5.73379400 |
| H  | -0.97558600 | -0.14566500 | -5.10277900 |
| N  | 0.26607100  | -0.68582400 | 2.02680000  |
| N  | 1.77040600  | -1.28818100 | 0.00034000  |
| N  | 0.26536400  | -0.68806500 | -2.02624200 |
| Ir | -0.02816500 | -0.51928600 | 0.00026500  |
| Cl | -0.88377000 | -2.81472000 | 0.00179300  |
| C  | 0.48357700  | 1.36395900  | -0.00077500 |
| C  | 1.71175400  | 2.11961200  | -0.00103900 |
| C  | -0.62912600 | 2.25324500  | -0.00124400 |
| C  | 1.48346900  | 3.51894500  | -0.00183100 |
| C  | 3.04235300  | 1.66676500  | -0.00062000 |
| S  | -0.22557600 | 3.90968000  | -0.00219500 |
| C  | -1.95860000 | 1.69822100  | -0.00082100 |
| C  | 2.51562500  | 4.44700700  | -0.00225000 |
| C  | 4.08592100  | 2.58850000  | -0.00103100 |
| H  | 3.25446700  | 0.59977100  | 0.00001500  |
| C  | -3.15809200 | 2.41288300  | -0.00123100 |
| N  | -1.94721200 | 0.33463500  | 0.00003600  |
| C  | 3.82743600  | 3.96234200  | -0.00184000 |
| H  | 2.31387300  | 5.51959700  | -0.00288500 |
| H  | 5.11749200  | 2.23172100  | -0.00071100 |
| C  | -4.35785700 | 1.71439700  | -0.00068500 |
| H  | -3.14500800 | 3.50371800  | -0.00198800 |
| C  | -3.09533200 | -0.33608000 | 0.00057900  |
| H  | 4.65759900  | 4.67179000  | -0.00215400 |
| C  | -4.32943500 | 0.31769800  | 0.00025000  |
| H  | -5.31091000 | 2.24473800  | -0.00098400 |
| H  | -3.02434400 | -1.42730600 | 0.00127400  |
| C  | -5.55762000 | -0.52699800 | 0.00087100  |
| O  | -5.53309400 | -1.73289900 | 0.00161300  |

|   |             |             |            |
|---|-------------|-------------|------------|
| O | -6.66887400 | 0.19872000  | 0.00049900 |
| H | -7.43043200 | -0.40396500 | 0.00091400 |

Structure of Ir7, T<sub>1</sub> state

|    |             |             |             |
|----|-------------|-------------|-------------|
| C  | -1.85795300 | -1.41445600 | -3.67771800 |
| C  | -1.49732400 | -1.24256000 | -2.33323400 |
| C  | 0.57661100  | -0.33949600 | -3.00149300 |
| C  | 0.26665200  | -0.49617400 | -4.33806500 |
| C  | -0.98044000 | -1.04521100 | -4.68052800 |
| H  | -2.83140600 | -1.84061600 | -3.92184000 |
| H  | 1.53068500  | 0.08373300  | -2.68283400 |
| H  | 0.98743000  | -0.19448700 | -5.09840800 |
| H  | -1.25746400 | -1.18002600 | -5.72777600 |
| C  | -2.33207400 | -1.59900200 | -1.20128200 |
| C  | -3.58679200 | -2.19280000 | -1.21073000 |
| C  | -4.22090800 | -2.46936900 | 0.01187500  |
| H  | -4.07243100 | -2.45029700 | -2.15235900 |
| C  | -2.33118200 | -1.58461300 | 1.21819500  |
| C  | -3.59134000 | -2.17893200 | 1.22645000  |
| H  | -5.20729400 | -2.93491200 | 0.01354000  |
| H  | -4.07996000 | -2.42439100 | 2.17002700  |
| C  | -1.50060000 | -1.21926100 | 2.34126800  |
| C  | -1.86005200 | -1.37437900 | 3.69158000  |
| C  | 0.57853900  | -0.31133600 | 3.00365500  |
| C  | -0.98324900 | -0.99655300 | 4.68859100  |
| H  | -2.83465900 | -1.79540200 | 3.94062100  |
| C  | 0.26843300  | -0.45262100 | 4.34044100  |
| H  | 1.53373800  | 0.10662700  | 2.68114800  |
| H  | -1.26074500 | -1.11894700 | 5.73728700  |
| H  | 0.98943600  | -0.14449300 | 5.09789300  |
| N  | -0.27016300 | -0.69865400 | -2.02251000 |
| N  | -1.77660400 | -1.27961000 | 0.00443200  |
| N  | -0.26756600 | -0.67944900 | 2.02606500  |
| Ir | 0.02056500  | -0.51102400 | 0.00359600  |
| Cl | 0.87884900  | -2.80771200 | 0.00900600  |
| C  | -0.48097700 | 1.37259100  | -0.00574400 |
| C  | -1.70798400 | 2.12987400  | -0.00909200 |
| C  | 0.63502300  | 2.25797800  | -0.01115200 |
| C  | -1.47568100 | 3.52878800  | -0.01744800 |
| C  | -3.03912100 | 1.67820600  | -0.00450500 |
| S  | 0.23511900  | 3.91775800  | -0.02040200 |
| C  | 1.96208500  | 1.69959600  | -0.00791400 |
| C  | -2.50755500 | 4.45814100  | -0.02193000 |
| C  | -4.08024400 | 2.60056900  | -0.00891200 |



|   |             |             |             |
|---|-------------|-------------|-------------|
| H | -3.25099700 | 0.61067400  | 0.00291600  |
| C | 3.16411600  | 2.41080300  | -0.01243800 |
| N | 1.94729900  | 0.33575400  | 0.00035800  |
| C | -3.81867700 | 3.97517700  | -0.01769400 |
| H | -2.30454400 | 5.53056000  | -0.02840200 |
| H | -5.11277000 | 2.24624100  | -0.00532200 |
| C | 4.36166400  | 1.70840500  | -0.00854200 |
| H | 3.15421500  | 3.50165400  | -0.01896900 |
| C | 3.09299800  | -0.33857300 | 0.00404300  |
| H | -4.64820300 | 4.68565200  | -0.02105700 |
| C | 4.32927600  | 0.31169100  | -0.00020000 |
| H | 5.31640100  | 2.23582600  | -0.01196600 |
| H | 3.01897600  | -1.42961400 | 0.01030000  |
| C | 5.55467700  | -0.53674500 | 0.00414900  |
| O | 5.52643200  | -1.74261100 | 0.01165300  |
| O | 6.66825900  | 0.18547600  | -0.00142600 |
| H | 7.42789900  | -0.41962900 | 0.00164400  |

#### Structure of Ir7, T<sub>2</sub> state

|   |             |             |             |
|---|-------------|-------------|-------------|
| C | 1.93459000  | -0.83012900 | 3.79629100  |
| C | 1.54245800  | -0.88710000 | 2.44322700  |
| C | -0.52202900 | 0.13104300  | 3.01112900  |
| C | -0.17705800 | 0.19791000  | 4.34319700  |
| C | 1.08718200  | -0.29628400 | 4.74197300  |
| H | 2.91564200  | -1.21057600 | 4.08294300  |
| H | -1.48397300 | 0.50216200  | 2.65303200  |
| H | -0.87618100 | 0.62576800  | 5.06164600  |
| H | 1.39141300  | -0.25381600 | 5.78931100  |
| C | 2.34151200  | -1.41749700 | 1.37557800  |
| C | 3.60732700  | -2.01647600 | 1.43824300  |
| C | 4.20689300  | -2.47433100 | 0.27090300  |
| H | 4.11515000  | -2.12967300 | 2.39662900  |
| C | 2.30345700  | -1.76546500 | -1.01384600 |
| C | 3.55179800  | -2.36276900 | -0.97354900 |
| H | 5.19129400  | -2.94170100 | 0.31805300  |
| H | 4.01932100  | -2.74643700 | -1.87994700 |
| C | 1.44803900  | -1.55305200 | -2.17904800 |
| C | 1.79322400  | -1.90156100 | -3.48792000 |
| C | -0.62397900 | -0.72929500 | -2.92809000 |
| C | 0.90415500  | -1.65678600 | -4.52291100 |
| H | 2.76043900  | -2.36403900 | -3.68563400 |
| C | -0.33044400 | -1.05896700 | -4.23876200 |
| H | -1.57154900 | -0.26181100 | -2.65576900 |
| H | 1.16698300  | -1.92792300 | -5.54700700 |

|    |             |             |             |
|----|-------------|-------------|-------------|
| H  | -1.05869800 | -0.85042100 | -5.02296600 |
| N  | 0.29369600  | -0.39329400 | 2.07837100  |
| N  | 1.76754000  | -1.29006000 | 0.13835300  |
| N  | 0.23319000  | -0.96675100 | -1.92324600 |
| Ir | -0.02708700 | -0.51655300 | 0.07118200  |
| Cl | -0.89021200 | -2.78731700 | 0.39361800  |
| C  | 0.48353800  | 1.35394800  | -0.18753800 |
| C  | 1.71313200  | 2.10119000  | -0.28150000 |
| C  | -0.62620100 | 2.23002000  | -0.30228500 |
| C  | 1.48464100  | 3.48834300  | -0.46846100 |
| C  | 3.04371000  | 1.65304700  | -0.21365800 |
| S  | -0.22314000 | 3.87545700  | -0.52173500 |
| C  | -1.95607900 | 1.68258700  | -0.21315500 |
| C  | 2.51912800  | 4.40830300  | -0.58794300 |
| C  | 4.08686100  | 2.56607300  | -0.33221900 |
| H  | 3.25623100  | 0.59601100  | -0.06815000 |
| C  | -3.15554400 | 2.39157000  | -0.30372700 |
| N  | -1.94593700 | 0.33305500  | -0.01904100 |
| C  | 3.82914700  | 3.92870800  | -0.51731100 |
| H  | 2.31826400  | 5.47146300  | -0.73134400 |
| H  | 5.11839200  | 2.21293100  | -0.27883000 |
| C  | -4.35517900 | 1.70183800  | -0.19543200 |
| H  | -3.14174500 | 3.47138800  | -0.45798600 |
| C  | -3.09446500 | -0.32969700 | 0.08586300  |
| H  | 4.66006700  | 4.63157700  | -0.60753100 |
| C  | -4.32781200 | 0.31884400  | 0.00222000  |
| H  | -5.30812100 | 2.22808500  | -0.26297800 |
| H  | -3.02406700 | -1.40997000 | 0.23953800  |
| C  | -5.55634000 | -0.51523300 | 0.12950800  |
| O  | -5.53336400 | -1.70811500 | 0.30686600  |
| O  | -6.66709100 | 0.20394400  | 0.02456300  |
| H  | -7.42906800 | -0.39132500 | 0.11506800  |

Structure of Ir8, S<sub>0</sub> state

|   |             |             |            |
|---|-------------|-------------|------------|
| C | 1.73222900  | 1.34934000  | 3.66525100 |
| C | 1.34791000  | 1.19707700  | 2.33747800 |
| C | -0.71099500 | 0.30428500  | 2.99167600 |
| C | -0.38152000 | 0.43152900  | 4.33683600 |
| C | 0.85747300  | 0.96293200  | 4.67777500 |
| H | 2.71012700  | 1.76505300  | 3.90763300 |
| H | -1.67026700 | -0.10697200 | 2.67414900 |
| H | -1.09622000 | 0.11375000  | 5.09671500 |
| H | 1.14702900  | 1.07612600  | 5.72396500 |
| C | 2.19668000  | 1.56277400  | 1.18871400 |

|    |             |             |             |
|----|-------------|-------------|-------------|
| C  | 3.46944800  | 2.13007600  | 1.21410300  |
| C  | 4.10130300  | 2.40393500  | 0.00120900  |
| H  | 3.96283200  | 2.35748000  | 2.15860900  |
| C  | 2.19684300  | 1.56374700  | -1.18725200 |
| C  | 3.46961800  | 2.13106500  | -1.21199800 |
| H  | 5.09940500  | 2.84468000  | 0.00145800  |
| H  | 3.96314900  | 2.35922600  | -2.15624600 |
| C  | 1.34822200  | 1.19899100  | -2.33642700 |
| C  | 1.73271200  | 1.35235300  | -3.66402500 |
| C  | -0.71062100 | 0.30679200  | -2.99163200 |
| C  | 0.85807500  | 0.96681200  | -4.67698100 |
| H  | 2.71064600  | 1.76825000  | -3.90593900 |
| C  | -0.38097700 | 0.43516700  | -4.33664300 |
| H  | -1.66994900 | -0.10469300 | -2.67457300 |
| H  | 1.14776600  | 1.08087000  | -5.72304000 |
| H  | -1.09559300 | 0.11805900  | -5.09688000 |
| N  | 0.12604200  | 0.67913300  | 2.02181300  |
| N  | 1.63126700  | 1.28799900  | 0.00057900  |
| N  | 0.12631100  | 0.68078900  | -2.02134800 |
| Ir | -0.18442700 | 0.56354800  | 0.00017000  |
| Cl | -0.96677900 | 2.89027400  | 0.00102600  |
| C  | 0.24165400  | -1.40385100 | -0.00052400 |
| C  | 1.43835200  | -2.20369200 | -0.00083900 |
| C  | -0.88363200 | -2.21127300 | -0.00072400 |
| C  | 1.15129400  | -3.59819900 | -0.00127700 |
| C  | 2.79152000  | -1.80628000 | -0.00077600 |
| S  | -0.55666900 | -3.92600600 | -0.00129700 |
| C  | -2.17814000 | -1.59938000 | -0.00052100 |
| C  | 2.16493100  | -4.56193200 | -0.00163400 |
| C  | 3.79606700  | -2.75948100 | -0.00113800 |
| H  | 3.05099900  | -0.74881400 | -0.00045500 |
| C  | -3.41787400 | -2.25678800 | -0.00066400 |
| N  | -2.11933900 | -0.23370700 | -0.00019800 |
| C  | 3.48462600  | -4.13123600 | -0.00156100 |
| H  | 1.92348600  | -5.62688300 | -0.00196100 |
| H  | 4.84136000  | -2.44302200 | -0.00109000 |
| C  | -4.58308900 | -1.51636800 | -0.00051600 |
| H  | -3.45061900 | -3.34707600 | -0.00089600 |
| C  | -3.23873300 | 0.48977200  | -0.00006900 |
| H  | 4.29007500  | -4.86939500 | -0.00183700 |
| C  | -4.49958000 | -0.11095700 | -0.00023000 |
| H  | -5.55616300 | -2.01008900 | -0.00062700 |
| H  | -3.10422100 | 1.57528900  | 0.00016900  |
| C  | -5.66995000 | 0.70671300  | -0.00009300 |

|   |             |            |            |
|---|-------------|------------|------------|
| N | -6.62200600 | 1.36904700 | 0.00001100 |
|---|-------------|------------|------------|

Structure of Ir8, S<sub>1</sub> state

|    |             |             |             |
|----|-------------|-------------|-------------|
| C  | 1.74076800  | 1.33029900  | 3.68427100  |
| C  | 1.36697500  | 1.19066700  | 2.33852200  |
| C  | -0.73898700 | 0.36469200  | 3.00810100  |
| C  | -0.41626500 | 0.49136600  | 4.34456100  |
| C  | 0.85536600  | 0.98468500  | 4.68739200  |
| H  | 2.73247900  | 1.71253200  | 3.92787000  |
| H  | -1.71193200 | -0.01542600 | 2.69221400  |
| H  | -1.14535600 | 0.21032200  | 5.10473400  |
| H  | 1.14340000  | 1.09422800  | 5.73449900  |
| C  | 2.20943100  | 1.52508900  | 1.20901800  |
| C  | 3.49065500  | 2.06560100  | 1.21848400  |
| C  | 4.13200200  | 2.32414200  | -0.00009200 |
| H  | 3.98968700  | 2.29286800  | 2.16081900  |
| C  | 2.20884700  | 1.52600300  | -1.20887900 |
| C  | 3.49006900  | 2.06653000  | -1.21854800 |
| H  | 5.13695600  | 2.74766600  | -0.00017200 |
| H  | 3.98865300  | 2.29449000  | -2.16095400 |
| C  | 1.36586600  | 1.19240000  | -2.33822000 |
| C  | 1.73905400  | 1.33291400  | -3.68404900 |
| C  | -0.74045500 | 0.36700000  | -3.00739600 |
| C  | 0.85316200  | 0.98804900  | -4.68699400 |
| H  | 2.73069700  | 1.71520400  | -3.92783700 |
| C  | -0.41835600 | 0.49460400  | -4.34391500 |
| H  | -1.71326600 | -0.01328900 | -2.69129600 |
| H  | 1.14073200  | 1.09824800  | -5.73416100 |
| H  | -1.14782500 | 0.21415700  | -5.10394600 |
| N  | 0.11498000  | 0.70058000  | 2.02727600  |
| N  | 1.64035600  | 1.24368100  | 0.00010300  |
| N  | 0.11400100  | 0.70212100  | -2.02673500 |
| Ir | -0.18503800 | 0.54335000  | 0.00027500  |
| Cl | -0.95838000 | 2.86707100  | 0.00132800  |
| C  | 0.25618700  | -1.35735500 | -0.00049100 |
| C  | 1.45526100  | -2.15805000 | -0.00091500 |
| C  | -0.88881500 | -2.20531700 | -0.00061900 |
| C  | 1.17488200  | -3.54797300 | -0.00133300 |
| C  | 2.80176900  | -1.75521000 | -0.00095200 |
| S  | -0.54689000 | -3.87529000 | -0.00128600 |
| C  | -2.19598100 | -1.60162900 | -0.00026400 |
| C  | 2.17170000  | -4.51396400 | -0.00175100 |
| C  | 3.81027300  | -2.71542400 | -0.00137300 |
| H  | 3.05428200  | -0.69711900 | -0.00064500 |

|   |             |             |             |
|---|-------------|-------------|-------------|
| C | -3.42245000 | -2.27152500 | -0.00048900 |
| N | -2.13577100 | -0.23999000 | 0.00040700  |
| C | 3.50066300  | -4.07848700 | -0.00176500 |
| H | 1.93089700  | -5.57832300 | -0.00206700 |
| H | 4.85440000  | -2.39738800 | -0.00139500 |
| C | -4.59526600 | -1.53420700 | -0.00011100 |
| H | -3.45219100 | -3.36182300 | -0.00095700 |
| C | -3.25349400 | 0.47888100  | 0.00075300  |
| H | 4.30360900  | -4.81856000 | -0.00209400 |
| C | -4.51364800 | -0.13389300 | 0.00049400  |
| H | -5.56566500 | -2.03240900 | -0.00027200 |
| H | -3.12474500 | 1.56535000  | 0.00127900  |
| C | -5.68873000 | 0.67967800  | 0.00086400  |
| N | -6.64171900 | 1.33908700  | 0.00115300  |

Structure of Ir8, T<sub>1</sub> state

|   |             |             |             |
|---|-------------|-------------|-------------|
| C | 1.75245200  | -1.36918800 | -3.66847200 |
| C | 1.37787500  | -1.21037200 | -2.32665200 |
| C | -0.72766900 | -0.39541000 | -3.00605200 |
| C | -0.40509600 | -0.54215900 | -4.34086800 |
| C | 0.86519100  | -1.03855500 | -4.67644200 |
| H | 2.74420700  | -1.75447500 | -3.90666900 |
| H | -1.70038900 | -0.01137800 | -2.69437500 |
| H | -1.13452100 | -0.27275700 | -5.10506500 |
| H | 1.15274300  | -1.16326100 | -5.72208100 |
| C | 2.22122400  | -1.53171300 | -1.18996200 |
| C | 3.49878200  | -2.07310700 | -1.19381800 |
| C | 4.13930800  | -2.32079300 | 0.03234200  |
| H | 3.99805500  | -2.31186800 | -2.13318800 |
| C | 2.20981800  | -1.51190300 | 1.22950000  |
| C | 3.49403800  | -2.05368400 | 1.24308400  |
| H | 5.14411600  | -2.74502300 | 0.03867000  |
| H | 3.98868000  | -2.27615100 | 2.18924000  |
| C | 1.36156300  | -1.17898400 | 2.34798200  |
| C | 1.72247000  | -1.31630400 | 3.70013000  |
| C | -0.75706300 | -0.35975500 | 3.00187100  |
| C | 0.82690700  | -0.97533500 | 4.69324200  |
| H | 2.71363300  | -1.69425700 | 3.95289300  |
| C | -0.44625300 | -0.48658200 | 4.33965000  |
| H | -1.72838500 | 0.01717300  | 2.67707000  |
| H | 1.10561500  | -1.08399200 | 5.74311800  |
| H | -1.18280900 | -0.20923000 | 5.09399200  |
| N | 0.12890300  | -0.71637100 | -2.02231200 |
| N | 1.64744100  | -1.23381900 | 0.01237500  |

|    |             |             |             |
|----|-------------|-------------|-------------|
| N  | 0.10773400  | -0.69164200 | 2.02719800  |
| Ir | -0.17734200 | -0.53592700 | 0.00365700  |
| Cl | -0.95103100 | -2.86213300 | 0.00604500  |
| C  | 0.25190400  | 1.36524700  | -0.00806200 |
| C  | 1.44886000  | 2.16873700  | -0.01251000 |
| C  | -0.89719600 | 2.20816000  | -0.01330700 |
| C  | 1.16311100  | 3.55783800  | -0.01983500 |
| C  | 2.79634100  | 1.76849500  | -0.00919000 |
| S  | -0.56084600 | 3.88151800  | -0.02157000 |
| C  | -2.20122100 | 1.59990300  | -0.01216200 |
| C  | 2.15851600  | 4.52611400  | -0.02409700 |
| C  | 3.80133000  | 2.73023900  | -0.01362700 |
| H  | 3.04985800  | 0.71015200  | -0.00260600 |
| C  | -3.43076200 | 2.26511500  | -0.01749000 |
| N  | -2.13637200 | 0.23819100  | -0.00597400 |
| C  | 3.48718200  | 4.09363200  | -0.02112100 |
| H  | 1.91549000  | 5.59003400  | -0.02939700 |
| H  | 4.84665200  | 2.41578400  | -0.01103200 |
| C  | -4.60047600 | 1.52280500  | -0.01703600 |
| H  | -3.46486700 | 3.35530400  | -0.02198000 |
| C  | -3.25079000 | -0.48529700 | -0.00576700 |
| H  | 4.28868500  | 4.83553900  | -0.02445100 |
| C  | -4.51362200 | 0.12262400  | -0.01133600 |
| H  | -5.57291700 | 2.01713400  | -0.02108300 |
| H  | -3.11754000 | -1.57126500 | -0.00077500 |
| C  | -5.68541700 | -0.69545000 | -0.01091500 |
| N  | -6.63595000 | -1.35850900 | -0.01070900 |

#### Structure of Ir8, T<sub>2</sub> state

|   |             |             |             |
|---|-------------|-------------|-------------|
| C | -1.81878700 | -0.66330000 | 3.80780400  |
| C | -1.41846600 | -0.77677500 | 2.46024200  |
| C | 0.67527800  | 0.18934500  | 3.01380300  |
| C | 0.32196000  | 0.31152000  | 4.33962600  |
| C | -0.96134200 | -0.12806900 | 4.74331300  |
| H | -2.81441000 | -1.00096000 | 4.09768900  |
| H | 1.65157400  | 0.51800200  | 2.65339900  |
| H | 1.02896800  | 0.74022500  | 5.04981000  |
| H | -1.27195700 | -0.04157000 | 5.78605500  |
| C | -2.22765800 | -1.31011300 | 1.40281700  |
| C | -3.51486700 | -1.86201600 | 1.47239200  |
| C | -4.12129500 | -2.33416300 | 0.31488400  |
| H | -4.03357100 | -1.92785600 | 2.42937200  |
| C | -2.18477000 | -1.73190200 | -0.97474500 |
| C | -3.45332400 | -2.28397300 | -0.92700700 |

|    |             |             |             |
|----|-------------|-------------|-------------|
| H  | -5.12188100 | -2.76509100 | 0.36789300  |
| H  | -3.92664200 | -2.67944100 | -1.82531100 |
| C  | -1.31439000 | -1.58537500 | -2.13914000 |
| C  | -1.66482400 | -1.95665700 | -3.44007800 |
| C  | 0.79159400  | -0.86159700 | -2.89531300 |
| C  | -0.76038600 | -1.77519300 | -4.47496000 |
| H  | -2.64841900 | -2.38587800 | -3.63170400 |
| C  | 0.49414800  | -1.21713000 | -4.19841200 |
| H  | 1.75392900  | -0.42136300 | -2.62979600 |
| H  | -1.02705600 | -2.06440800 | -5.49310200 |
| H  | 1.23482500  | -1.05831800 | -4.98262900 |
| N  | -0.14937100 | -0.33925500 | 2.09099600  |
| N  | -1.64052700 | -1.24061100 | 0.16674300  |
| N  | -0.08020100 | -1.03836100 | -1.89066400 |
| Ir | 0.18215500  | -0.53834000 | 0.09238900  |
| Cl | 0.95877800  | -2.82837000 | 0.48969700  |
| C  | -0.25249600 | 1.34169500  | -0.22825300 |
| C  | -1.45102500 | 2.13244200  | -0.35474900 |
| C  | 0.89138900  | 2.17051800  | -0.35835800 |
| C  | -1.16701400 | 3.50373400  | -0.57947000 |
| C  | -2.79844600 | 1.73800800  | -0.28544700 |
| S  | 0.55405200  | 3.82336300  | -0.62833800 |
| C  | 2.19733900  | 1.57529400  | -0.24019000 |
| C  | -2.16407200 | 4.45925400  | -0.73445900 |
| C  | -3.80416600 | 2.68703600  | -0.43935800 |
| H  | -3.05329000 | 0.69474800  | -0.11111900 |
| C  | 3.42547900  | 2.23488500  | -0.33936200 |
| N  | 2.13496200  | 0.23412900  | -0.00661000 |
| C  | -3.49206300 | 4.03271200  | -0.66139500 |
| H  | -1.92133800 | 5.50919100  | -0.90668800 |
| H  | -4.84907000 | 2.37600400  | -0.38473200 |
| C  | 4.59616100  | 1.50827100  | -0.19854900 |
| H  | 3.45715300  | 3.30906300  | -0.52554800 |
| C  | 3.25119800  | -0.47484900 | 0.13054900  |
| H  | -4.29425300 | 4.76427900  | -0.77906700 |
| C  | 4.51204900  | 0.12836900  | 0.04065500  |
| H  | 5.56735400  | 1.99933300  | -0.27205000 |
| H  | 3.11985400  | -1.54511200 | 0.31486800  |
| C  | 5.68574700  | -0.67252000 | 0.19423400  |
| N  | 6.63806800  | -1.32116800 | 0.31821900  |

Structure of Ir9, S<sub>0</sub> state

|   |             |             |             |
|---|-------------|-------------|-------------|
| C | -1.86711500 | -1.26434500 | -3.70129400 |
| C | -1.48252900 | -1.14701600 | -2.37003500 |

|    |             |             |             |
|----|-------------|-------------|-------------|
| C  | 0.53884200  | -0.15483200 | -2.99757100 |
| C  | 0.20822400  | -0.24490600 | -4.34537300 |
| C  | -1.01177200 | -0.80909600 | -4.70169900 |
| H  | -2.83044300 | -1.70615800 | -3.95563300 |
| H  | 1.48355900  | 0.28003300  | -2.66840600 |
| H  | 0.90722100  | 0.12698500  | -5.09522700 |
| H  | -1.30179800 | -0.89422300 | -5.75041000 |
| C  | -2.31230300 | -1.58522200 | -1.23287100 |
| C  | -3.55847600 | -2.20786600 | -1.27578300 |
| C  | -4.17403700 | -2.55055000 | -0.07213600 |
| H  | -4.04284700 | -2.42674000 | -2.22689200 |
| C  | -2.30530600 | -1.66733300 | 1.14144800  |
| C  | -3.55151300 | -2.29113200 | 1.14866200  |
| H  | -5.15098300 | -3.03620900 | -0.08590800 |
| H  | -4.03064700 | -2.57472000 | 2.08522800  |
| C  | -1.46866200 | -1.30828200 | 2.30100800  |
| C  | -1.84368500 | -1.52039700 | 3.62317200  |
| C  | 0.55385200  | -0.35533300 | 2.98309900  |
| C  | -0.98303900 | -1.13318600 | 4.64739900  |
| H  | -2.80380100 | -1.98258100 | 3.85220600  |
| C  | 0.23244200  | -0.54035400 | 4.32343900  |
| H  | 1.49461000  | 0.10579400  | 2.67900400  |
| H  | -1.26566000 | -1.29264800 | 5.68945300  |
| H  | 0.93505800  | -0.21875100 | 5.09290300  |
| N  | -0.27921500 | -0.59600700 | -2.03945700 |
| N  | -1.75633800 | -1.32556500 | -0.03692100 |
| N  | -0.26891300 | -0.73216700 | 2.00179200  |
| Ir | 0.03332800  | -0.53768100 | -0.01504100 |
| Cl | 0.89563200  | -2.83332700 | -0.09166100 |
| C  | -0.45036800 | 1.41345300  | 0.04739500  |
| C  | -1.66992100 | 2.17596100  | 0.06988900  |
| C  | 0.65098700  | 2.25604000  | 0.06844400  |
| C  | -1.42600800 | 3.57814400  | 0.10735700  |
| C  | -3.00967600 | 1.73545800  | 0.06117300  |
| S  | 0.27084500  | 3.95924800  | 0.11538400  |
| C  | 1.96133300  | 1.68443300  | 0.04824500  |
| C  | -2.46942600 | 4.50904100  | 0.13423300  |
| C  | -4.04350200 | 2.65607500  | 0.08750700  |
| H  | -3.23438000 | 0.67033000  | 0.03402300  |
| C  | 3.18207400  | 2.37972200  | 0.06625700  |
| N  | 1.94157900  | 0.31598600  | 0.00738400  |
| C  | -3.77476900 | 4.03655900  | 0.12373400  |
| H  | -2.26176600 | 5.58071100  | 0.16285200  |
| H  | -5.07840100 | 2.30731300  | 0.08043200  |



|   |             |             |             |
|---|-------------|-------------|-------------|
| C | 4.36929300  | 1.67522800  | 0.04279600  |
| H | 3.18156400  | 3.46982400  | 0.09893900  |
| C | 3.08160000  | -0.37330200 | -0.01462500 |
| H | -4.60308500 | 4.74866500  | 0.14423100  |
| C | 4.30457200  | 0.28041800  | 0.00223300  |
| H | 5.33786600  | 2.17554600  | 0.05553000  |
| H | 3.00093200  | -1.46272800 | -0.04606700 |
| N | 5.52364700  | -0.51190400 | -0.02413600 |
| O | 5.41233500  | -1.71948700 | -0.05391000 |
| O | 6.57835200  | 0.08609700  | -0.01274600 |

Structure of Ir9, S<sub>1</sub> state

|    |             |             |             |
|----|-------------|-------------|-------------|
| C  | -1.86442300 | -1.37056000 | -3.68476600 |
| C  | -1.49604000 | -1.21852800 | -2.33880500 |
| C  | 0.58144600  | -0.32235000 | -3.00787500 |
| C  | 0.26325400  | -0.45898300 | -4.34434600 |
| C  | -0.99089600 | -0.99511500 | -4.68750500 |
| H  | -2.84245900 | -1.78621200 | -3.92886500 |
| H  | 1.54101400  | 0.08985800  | -2.69161000 |
| H  | 0.98243800  | -0.15299600 | -5.10431700 |
| H  | -1.27472500 | -1.11426800 | -5.73470700 |
| C  | -2.32727100 | -1.58013700 | -1.20959300 |
| C  | -3.58996400 | -2.16278900 | -1.21917400 |
| C  | -4.22256300 | -2.44258800 | -0.00084600 |
| H  | -4.08108700 | -2.40648300 | -2.16155000 |
| C  | -2.32706900 | -1.58145200 | 1.20840300  |
| C  | -3.58964900 | -2.16408700 | 1.21777500  |
| H  | -5.21286700 | -2.89929600 | -0.00097800 |
| H  | -4.08054300 | -2.40880600 | 2.15999700  |
| C  | -1.49550000 | -1.22103900 | 2.33795800  |
| C  | -1.86363800 | -1.37457800 | 3.68373200  |
| C  | 0.58205600  | -0.32564000 | 3.00749400  |
| C  | -0.98987100 | -1.00022700 | 4.68674700  |
| H  | -2.84161800 | -1.79051100 | 3.92756800  |
| C  | 0.26413400  | -0.46375100 | 4.34390900  |
| H  | 1.54155400  | 0.08691200  | 2.69147300  |
| H  | -1.27348100 | -1.12054500 | 5.73387400  |
| H  | 0.98348800  | -0.15858700 | 5.10405200  |
| N  | -0.26078300 | -0.68756700 | -2.02732800 |
| N  | -1.76819800 | -1.27969700 | -0.00042800 |
| N  | -0.26040800 | -0.68977000 | 2.02676900  |
| Ir | 0.03415500  | -0.52138700 | -0.00026400 |
| Cl | 0.88619300  | -2.81569100 | -0.00163000 |
| C  | -0.46503400 | 1.36468000  | 0.00073200  |

|   |             |             |             |
|---|-------------|-------------|-------------|
| C | -1.68794900 | 2.12850700  | 0.00101000  |
| C | 0.65341800  | 2.24720100  | 0.00125900  |
| C | -1.44999000 | 3.52625100  | 0.00183100  |
| C | -3.02123100 | 1.68476100  | 0.00057700  |
| S | 0.26039300  | 3.90541700  | 0.00220200  |
| C | 1.97889800  | 1.68414700  | 0.00089200  |
| C | -2.47555600 | 4.46189700  | 0.00225800  |
| C | -4.05844800 | 2.61418200  | 0.00099200  |
| H | -3.24113000 | 0.61935000  | -0.00009000 |
| C | 3.18411700  | 2.39298600  | 0.00128100  |
| N | 1.95829000  | 0.32047500  | 0.00005900  |
| C | -3.79059300 | 3.98606600  | 0.00182900  |
| H | -2.26641700 | 5.53300800  | 0.00290500  |
| H | -5.09241200 | 2.26451000  | 0.00065300  |
| C | 4.37998600  | 1.69143400  | 0.00076200  |
| H | 3.17982800  | 3.48360300  | 0.00197900  |
| C | 3.09806100  | -0.36474400 | -0.00041600 |
| H | -4.61585300 | 4.70115600  | 0.00214700  |
| C | 4.31732000  | 0.30228800  | -0.00009400 |
| H | 5.34576400  | 2.19719600  | 0.00099700  |
| H | 3.02287300  | -1.45536200 | -0.00105900 |
| N | 5.54886800  | -0.48862000 | -0.00068000 |
| O | 5.43670900  | -1.69372100 | -0.00106700 |
| O | 6.59550200  | 0.11792800  | -0.00075400 |

#### Structure of Ir9, T<sub>1</sub> state

|   |             |             |             |
|---|-------------|-------------|-------------|
| C | -1.84469700 | -1.40189500 | -3.66572600 |
| C | -1.47152000 | -1.22246800 | -2.33829100 |
| C | 0.57089300  | -0.28937800 | -2.99520800 |
| C | 0.25161600  | -0.44343100 | -4.33987800 |
| C | -0.97352300 | -1.00767800 | -4.67853100 |
| H | -2.80960800 | -1.84682300 | -3.90812400 |
| H | 1.51867400  | 0.14667200  | -2.67568700 |
| H | 0.96285300  | -0.12108900 | -5.10102000 |
| H | -1.25470100 | -1.14232800 | -5.72448000 |
| C | -2.31322400 | -1.60641600 | -1.18872800 |
| C | -3.56705300 | -2.21470400 | -1.21405000 |
| C | -4.18910200 | -2.50760900 | -0.00031800 |
| H | -4.05331100 | -2.45941000 | -2.15788600 |
| C | -2.31281100 | -1.60735600 | 1.18816700  |
| C | -3.56664900 | -2.21563100 | 1.21343300  |
| H | -5.17251000 | -2.98026400 | -0.00033600 |
| H | -4.05259900 | -2.46107100 | 2.15723800  |
| C | -1.47070300 | -1.22436200 | 2.33775900  |

|    |             |             |             |
|----|-------------|-------------|-------------|
| C  | -1.84342500 | -1.40487800 | 3.66517600  |
| C  | 0.57193200  | -0.29180800 | 2.99475800  |
| C  | -0.97192900 | -1.01145300 | 4.67801200  |
| H  | -2.80823300 | -1.85004000 | 3.90754700  |
| C  | 0.25309000  | -0.44692200 | 4.33941000  |
| H  | 1.51961900  | 0.14447500  | 2.67528600  |
| H  | -1.25277000 | -1.14693600 | 5.72394400  |
| H  | 0.96458400  | -0.12519700 | 5.10057300  |
| N  | -0.26488200 | -0.66808400 | -2.02643600 |
| N  | -1.75995500 | -1.31307300 | -0.00026400 |
| N  | -0.26415600 | -0.66973600 | 2.02595500  |
| Ir | 0.03391500  | -0.52601600 | -0.00023300 |
| Cl | 0.88286000  | -2.82148100 | -0.00126100 |
| C  | -0.48837100 | 1.38856900  | 0.00057900  |
| C  | -1.69304700 | 2.14961900  | 0.00090600  |
| C  | 0.67022300  | 2.26846800  | 0.00081800  |
| C  | -1.45682600 | 3.55510500  | 0.00138500  |
| C  | -3.03879700 | 1.72325300  | 0.00081500  |
| S  | 0.27224300  | 3.93045500  | 0.00143800  |
| C  | 1.96339200  | 1.70957100  | 0.00049600  |
| C  | -2.47047100 | 4.48995700  | 0.00174200  |
| C  | -4.07210400 | 2.65937900  | 0.00117100  |
| H  | -3.27746300 | 0.66131900  | 0.00045800  |
| C  | 3.19982300  | 2.40148200  | 0.00072000  |
| N  | 1.94425100  | 0.31792700  | -0.00009200 |
| C  | -3.80064100 | 4.02780000  | 0.00162700  |
| H  | -2.25335000 | 5.56003400  | 0.00209900  |
| H  | -5.10746000 | 2.31227800  | 0.00108700  |
| C  | 4.38148500  | 1.70427300  | 0.00035700  |
| H  | 3.20048400  | 3.49308100  | 0.00119400  |
| C  | 3.07433500  | -0.36072500 | -0.00045100 |
| H  | -4.61883300 | 4.75076100  | 0.00189500  |
| C  | 4.31974400  | 0.28877800  | -0.00024300 |
| H  | 5.35050300  | 2.20133600  | 0.00051700  |
| H  | 3.00447900  | -1.45069000 | -0.00090300 |
| N  | 5.50094500  | -0.49302900 | -0.00062200 |
| O  | 5.39567800  | -1.71878700 | -0.00113000 |
| O  | 6.57936900  | 0.09625700  | -0.00040700 |

Structure of Ir9, T<sub>2</sub> state

|   |             |             |            |
|---|-------------|-------------|------------|
| C | 1.91115600  | -0.84211400 | 3.80004300 |
| C | 1.52693200  | -0.89388000 | 2.44347100 |
| C | -0.54756600 | 0.11043900  | 3.00637100 |
| C | -0.20965300 | 0.17201000  | 4.34024700 |

|    |             |             |             |
|----|-------------|-------------|-------------|
| C  | 1.05607700  | -0.31830900 | 4.74357400  |
| H  | 2.89269300  | -1.21890600 | 4.08973300  |
| H  | -1.50982100 | 0.47901800  | 2.64681900  |
| H  | -0.91466800 | 0.59253800  | 5.05723400  |
| H  | 1.35408800  | -0.27987800 | 5.79284100  |
| C  | 2.33370000  | -1.41284000 | 1.37862400  |
| C  | 3.60363700  | -2.00630900 | 1.44433300  |
| C  | 4.21070900  | -2.45551200 | 0.27905400  |
| H  | 4.10707500  | -2.12109800 | 2.40481300  |
| C  | 2.31088000  | -1.74923800 | -1.01239900 |
| C  | 3.56139500  | -2.34105500 | -0.96915700 |
| H  | 5.19713900  | -2.91830200 | 0.32888900  |
| H  | 4.03534900  | -2.71791000 | -1.87495600 |
| C  | 1.46124600  | -1.53407200 | -2.18237700 |
| C  | 1.81703300  | -1.87328600 | -3.49026300 |
| C  | -0.60804200 | -0.71362300 | -2.93953800 |
| C  | 0.93376000  | -1.62531900 | -4.52995000 |
| H  | 2.78733400  | -2.33068700 | -3.68430500 |
| C  | -0.30418500 | -1.03384300 | -4.25048800 |
| H  | -1.55909500 | -0.25075800 | -2.67207000 |
| H  | 1.20453800  | -1.88897300 | -5.55392300 |
| H  | -1.02778500 | -0.82244000 | -5.03822500 |
| N  | 0.27526100  | -0.40509900 | 2.07442100  |
| N  | 1.76604100  | -1.28241500 | 0.13809900  |
| N  | 0.24303800  | -0.95489000 | -1.93070200 |
| Ir | -0.03254300 | -0.51961200 | 0.06711600  |
| Cl | -0.88985900 | -2.79361900 | 0.36560200  |
| C  | 0.46337600  | 1.35722700  | -0.18107400 |
| C  | 1.68675900  | 2.11453200  | -0.26605900 |
| C  | -0.65263100 | 2.22429500  | -0.29749500 |
| C  | 1.44731500  | 3.50062400  | -0.44864900 |
| C  | 3.02042900  | 1.67702800  | -0.19252500 |
| S  | -0.26178100 | 3.87412500  | -0.50811800 |
| C  | -1.97750100 | 1.66640800  | -0.21411300 |
| C  | 2.47499100  | 4.42995900  | -0.55895400 |
| C  | 4.05630000  | 2.59939000  | -0.30191700 |
| H  | 3.24118200  | 0.62131200  | -0.04933600 |
| C  | -3.18382100 | 2.36835200  | -0.30294500 |
| N  | -1.95692300 | 0.31581200  | -0.02567100 |
| C  | 3.78812500  | 3.96073600  | -0.48309000 |
| H  | 2.26605900  | 5.49193000  | -0.69912800 |
| H  | 5.09047400  | 2.25485200  | -0.24411700 |
| C  | -4.37863700 | 1.67390700  | -0.19707100 |
| H  | -3.17989600 | 3.44854700  | -0.45299600 |

|   |             |             |             |
|---|-------------|-------------|-------------|
| C | -3.09630100 | -0.36312000 | 0.07719900  |
| H | 4.61374600  | 4.67070200  | -0.56584400 |
| C | -4.31550600 | 0.29755900  | -0.00566200 |
| H | -5.34500200 | 2.17478200  | -0.25900000 |
| H | -3.02073600 | -1.44336800 | 0.22628100  |
| N | -5.54628100 | -0.48441500 | 0.11469100  |
| O | -5.43416300 | -1.67904000 | 0.27410700  |
| O | -6.59315600 | 0.11799800  | 0.04626900  |

## 2.3 Frequency Calculation

### Information of the first three frequencies of Ir1

| $S_0$          | 1       | 2       | 3       |
|----------------|---------|---------|---------|
|                | A       | A       | A       |
| Frequencies -- | 23.9402 | 33.1201 | 39.5996 |
| Red. masses -- | 6.7258  | 6.1580  | 5.2720  |
| Frc consts --  | 0.0023  | 0.0040  | 0.0049  |
| IR Inten --    | 0.1540  | 0.6186  | 0.3508  |

| $S_1$          | 1        | 2       | 3       |
|----------------|----------|---------|---------|
|                | A        | A       | A       |
| Frequencies -- | 13.0644  | 28.5291 | 37.1253 |
| Red. masses -- | 6.7735   | 6.3149  | 5.2720  |
| Frc consts --  | 0.0007   | 0.0030  | 0.0043  |
| IR Inten --    | 188.6179 | 8.0809  | 0.2363  |

| $T_1$          | 1       | 2       | 3       |
|----------------|---------|---------|---------|
|                | A       | A       | A       |
| Frequencies -- | 21.8830 | 26.6586 | 35.8789 |
| Red. masses -- | 6.4994  | 6.5728  | 5.3057  |
| Frc consts --  | 0.0018  | 0.0028  | 0.0040  |
| IR Inten --    | 8.9055  | 4.8482  | 36.3100 |

| $T_2$          | 1       | 2       | 3       |
|----------------|---------|---------|---------|
|                | A       | A       | A       |
| Frequencies -- | 23.0791 | 30.2022 | 34.2470 |
| Red. masses -- | 6.9995  | 5.9210  | 5.3090  |
| Frc consts --  | 0.0022  | 0.0032  | 0.0037  |
| IR Inten --    | 0.0009  | 2.8506  | 0.0381  |

### Information of the first three frequencies of Ir2

| $S_0$          | 1       | 2       | 3       |
|----------------|---------|---------|---------|
|                | A       | A       | A       |
| Frequencies -- | 16.8327 | 21.0196 | 28.3626 |
| Red. masses -- | 16.3477 | 8.2767  | 7.9166  |
| Frc consts --  | 0.0027  | 0.0022  | 0.0038  |
| IR Inten --    | 0.0042  | 0.0416  | 0.0039  |

| $S_1$          | 1       | 2       | 3       |
|----------------|---------|---------|---------|
|                | A       | A       | A       |
| Frequencies -- | 13.4491 | 17.3010 | 25.0073 |
| Red. masses -- | 18.0706 | 7.0914  | 6.5090  |
| Frc consts --  | 0.0019  | 0.0013  | 0.0024  |
| IR Inten --    | 0.0561  | 85.6742 | 18.1002 |

|                |         |           |          |
|----------------|---------|-----------|----------|
| T <sub>1</sub> | 1       | 2         | 3        |
|                | A       | A         | A        |
| Frequencies -- | 10.4941 | 15.7228   | 19.7661  |
| Red. masses -- | 17.2654 | 7.3348    | 5.9575   |
| Frc consts --  | 0.0011  | 0.0011    | 0.0014   |
| IR Inten --    | 38.5999 | 1500.8703 | 483.1275 |

|                |         |         |         |
|----------------|---------|---------|---------|
| T <sub>2</sub> | 1       | 2       | 3       |
|                | A       | A       | A       |
| Frequencies -- | 12.1871 | 19.0229 | 25.9009 |
| Red. masses -- | 17.6534 | 8.2779  | 5.8802  |
| Frc consts --  | 0.0015  | 0.0018  | 0.0023  |
| IR Inten --    | 0.0101  | 0.0977  | 0.3269  |

Information of the first three frequencies of Ir3

|                |         |         |         |
|----------------|---------|---------|---------|
| S <sub>0</sub> | 1       | 2       | 3       |
|                | A       | A       | A       |
| Frequencies -- | 14.3018 | 16.7954 | 21.1105 |
| Red. masses -- | 4.3440  | 6.1881  | 5.0765  |
| Frc consts --  | 0.0005  | 0.0010  | 0.0013  |
| IR Inten --    | 0.0473  | 0.0027  | 1.8216  |

|                |         |         |         |
|----------------|---------|---------|---------|
| S <sub>1</sub> | 1       | 2       | 3       |
|                | A       | A       | A       |
| Frequencies -- | 15.7160 | 17.4220 | 20.7808 |
| Red. masses -- | 4.2177  | 5.5199  | 5.0013  |
| Frc consts --  | 0.0006  | 0.0010  | 0.0013  |
| IR Inten --    | 0.0516  | 0.1035  | 1.4342  |

|                |         |         |         |
|----------------|---------|---------|---------|
| T <sub>1</sub> | 1       | 2       | 3       |
|                | A       | A       | A       |
| Frequencies -- | 14.6471 | 16.3102 | 19.0092 |
| Red. masses -- | 4.3024  | 5.4445  | 4.2914  |
| Frc consts --  | 0.0005  | 0.0009  | 0.0009  |
| IR Inten --    | 0.0503  | 0.0795  | 1.2167  |

|                |         |         |         |
|----------------|---------|---------|---------|
| T <sub>2</sub> | 1       | 2       | 3       |
|                | A       | A       | A       |
| Frequencies -- | 14.5196 | 17.9715 | 19.6787 |
| Red. masses -- | 4.2089  | 5.4982  | 5.1263  |
| Frc consts --  | 0.0005  | 0.0010  | 0.0012  |
| IR Inten --    | 0.0158  | 0.4077  | 0.8801  |

Information of the first three frequencies of Ir4

|                |         |         |         |
|----------------|---------|---------|---------|
| S <sub>0</sub> | 1       | 2       | 3       |
|                | A       | A       | A       |
| Frequencies -- | 14.3835 | 16.2228 | 17.8350 |
| Red. masses -- | 9.2674  | 4.4416  | 10.4443 |
| Frc consts --  | 0.0011  | 0.0007  | 0.0020  |
| IR Inten --    | 0.0862  | 0.0520  | 0.0195  |

|                |         |         |         |
|----------------|---------|---------|---------|
| S <sub>1</sub> | 1       | 2       | 3       |
|                | A       | A       | A       |
| Frequencies -- | 14.6384 | 15.5314 | 16.5029 |
| Red. masses -- | 18.1577 | 4.2869  | 6.6171  |
| Frc consts --  | 0.0023  | 0.0006  | 0.0011  |
| IR Inten --    | 0.0488  | 0.0958  | 0.0892  |

|                |         |         |         |
|----------------|---------|---------|---------|
| T <sub>1</sub> | 1       | 2       | 3       |
|                | A       | A       | A       |
| Frequencies -- | 15.7699 | 16.3915 | 18.7606 |
| Red. masses -- | 6.3299  | 4.4462  | 3.1720  |
| Frc consts --  | 0.0009  | 0.0007  | 0.0007  |
| IR Inten --    | 0.2332  | 0.0791  | 0.3595  |

|                |         |         |         |
|----------------|---------|---------|---------|
| T <sub>2</sub> | 1       | 2       | 3       |
|                | A       | A       | A       |
| Frequencies -- | 15.0012 | 17.4247 | 20.7075 |
| Red. masses -- | 7.5673  | 4.2556  | 14.0122 |
| Frc consts --  | 0.0010  | 0.0008  | 0.0035  |
| IR Inten --    | 0.1404  | 0.2712  | 0.0948  |

Information of the first three frequencies of Ir5

|                |         |         |         |
|----------------|---------|---------|---------|
| S <sub>0</sub> | 1       | 2       | 3       |
|                | A       | A       | A       |
| Frequencies -- | 22.3804 | 31.2770 | 34.1198 |
| Red. masses -- | 7.0521  | 7.5707  | 8.4948  |
| Frc consts --  | 0.0021  | 0.0044  | 0.0058  |
| IR Inten --    | 0.2299  | 0.6639  | 0.0066  |

|                |          |         |         |
|----------------|----------|---------|---------|
| S <sub>1</sub> | 1        | 2       | 3       |
|                | A        | A       | A       |
| Frequencies -- | 16.0646  | 25.0481 | 32.2005 |
| Red. masses -- | 6.8705   | 6.3386  | 11.5006 |
| Frc consts --  | 0.0010   | 0.0023  | 0.0070  |
| IR Inten --    | 147.4014 | 0.3974  | 18.3480 |
| T <sub>1</sub> | 1        | 2       | 3       |



|                |         |         |         |
|----------------|---------|---------|---------|
|                | A       | A       | A       |
| Frequencies -- | 19.2865 | 24.9173 | 31.6203 |
| Red. masses -- | 6.2010  | 7.2840  | 10.7534 |
| Frc consts --  | 0.0014  | 0.0027  | 0.0063  |
| IR Inten --    | 0.7681  | 40.1548 | 48.0645 |

|                |         |         |         |
|----------------|---------|---------|---------|
| T <sub>2</sub> | 1       | 2       | 3       |
|                | A       | A       | A       |
| Frequencies -- | 23.9284 | 26.3150 | 33.2565 |
| Red. masses -- | 7.9693  | 6.3375  | 9.0675  |
| Frc consts --  | 0.0027  | 0.0026  | 0.0059  |
| IR Inten --    | 0.0388  | 1.6530  | 0.1663  |

#### Information of the first three frequencies of Ir6

|                |         |         |         |
|----------------|---------|---------|---------|
| S <sub>0</sub> | 1       | 2       | 3       |
|                | A       | A       | A       |
| Frequencies -- | 23.5597 | 32.9806 | 37.4632 |
| Red. masses -- | 6.7695  | 6.5857  | 5.4055  |
| Frc consts --  | 0.0022  | 0.0042  | 0.0045  |
| IR Inten --    | 0.1130  | 0.8990  | 0.0074  |

|                |          |         |         |
|----------------|----------|---------|---------|
| S <sub>1</sub> | 1        | 2       | 3       |
|                | A        | A       | A       |
| Frequencies -- | 17.3823  | 29.4560 | 37.8806 |
| Red. masses -- | 6.8931   | 6.3638  | 9.4632  |
| Frc consts --  | 0.0012   | 0.0033  | 0.0080  |
| IR Inten --    | 129.3293 | 4.6326  | 14.4499 |

|                |           |          |          |
|----------------|-----------|----------|----------|
| T <sub>1</sub> | 1         | 2        | 3        |
|                | A         | A        | A        |
| Frequencies -- | 19.4024   | 23.9424  | 31.1873  |
| Red. masses -- | 6.7259    | 6.6107   | 8.9596   |
| Frc consts --  | 0.0015    | 0.0022   | 0.0051   |
| IR Inten --    | 1118.1048 | 198.5853 | 867.4858 |

|                |         |         |         |
|----------------|---------|---------|---------|
| T <sub>2</sub> | 1       | 2       | 3       |
|                | A       | A       | A       |
| Frequencies -- | 24.1091 | 29.2885 | 39.4860 |
| Red. masses -- | 7.0551  | 6.6639  | 8.4383  |
| Frc consts --  | 0.0024  | 0.0034  | 0.0078  |
| IR Inten --    | 0.3365  | 2.1258  | 0.4110  |

Information of the first three frequencies of Ir7

|                |         |         |         |
|----------------|---------|---------|---------|
| $S_0$          | 1       | 2       | 3       |
|                | A       | A       | A       |
| Frequencies -- | 17.1825 | 24.7678 | 31.6992 |
| Red. masses -- | 7.5017  | 6.6227  | 5.8360  |
| Frc consts --  | 0.0013  | 0.0024  | 0.0035  |
| IR Inten --    | 0.0639  | 0.3208  | 0.7055  |

|                |          |         |         |
|----------------|----------|---------|---------|
| $S_1$          | 1        | 2       | 3       |
|                | A        | A       | A       |
| Frequencies -- | 16.5041  | 23.4060 | 29.7548 |
| Red. masses -- | 6.6376   | 6.7016  | 7.9138  |
| Frc consts --  | 0.0011   | 0.0022  | 0.0041  |
| IR Inten --    | 120.6687 | 0.0610  | 12.5747 |

|                |          |          |          |
|----------------|----------|----------|----------|
| $T_1$          | 1        | 2        | 3        |
|                | A        | A        | A        |
| Frequencies -- | 13.7405  | 22.5398  | 27.7465  |
| Red. masses -- | 6.4294   | 6.8293   | 7.9418   |
| Frc consts --  | 0.0007   | 0.0020   | 0.0036   |
| IR Inten --    | 161.9712 | 288.4797 | 269.0272 |

|                |         |         |         |
|----------------|---------|---------|---------|
| $T_2$          | 1       | 2       | 3       |
|                | A       | A       | A       |
| Frequencies -- | 21.2476 | 29.3074 | 37.3681 |
| Red. masses -- | 7.7499  | 7.4615  | 5.4316  |
| Frc consts --  | 0.0021  | 0.0038  | 0.0045  |
| IR Inten --    | 0.9506  | 0.3323  | 2.9301  |

Information of the first three frequencies of Ir8

|                |         |         |         |
|----------------|---------|---------|---------|
| $S_0$          | 1       | 2       | 3       |
|                | A       | A       | A       |
| Frequencies -- | 22.6957 | 27.3971 | 32.9405 |
| Red. masses -- | 7.0325  | 6.7364  | 8.1485  |
| Frc consts --  | 0.0021  | 0.0030  | 0.0052  |
| IR Inten --    | 0.0017  | 0.4917  | 0.7934  |

|                |         |         |         |
|----------------|---------|---------|---------|
| $S_1$          | 1       | 2       | 3       |
|                | A       | A       | A       |
| Frequencies -- | 18.2823 | 24.6373 | 32.4479 |
| Red. masses -- | 6.7444  | 6.3700  | 9.3917  |
| Frc consts --  | 0.0013  | 0.0023  | 0.0058  |
| IR Inten --    | 88.2239 | 0.2172  | 17.8587 |

|                |         |         |         |
|----------------|---------|---------|---------|
| T <sub>1</sub> | 1       | 2       | 3       |
|                | A       | A       | A       |
| Frequencies -- | 8.9413  | 25.0041 | 31.3765 |
| Red. masses -- | 6.1422  | 7.2201  | 9.1975  |
| Frc consts --  | 0.0003  | 0.0027  | 0.0053  |
| IR Inten --    | 44.2629 | 42.5267 | 50.1832 |

|                |         |         |         |
|----------------|---------|---------|---------|
| T <sub>2</sub> | 1       | 2       | 3       |
|                | A       | A       | A       |
| Frequencies -- | 23.5716 | 30.6350 | 38.1688 |
| Red. masses -- | 7.7311  | 8.0053  | 6.2556  |
| Frc consts --  | 0.0025  | 0.0044  | 0.0054  |
| IR Inten --    | 0.3560  | 0.0829  | 14.0804 |

Information of the first three frequencies of Ir9

|                |         |         |         |
|----------------|---------|---------|---------|
| S <sub>0</sub> | 1       | 2       | 3       |
|                | A       | A       | A       |
| Frequencies -- | 22.0804 | 29.3699 | 30.9521 |
| Red. masses -- | 7.1119  | 7.3678  | 7.8028  |
| Frc consts --  | 0.0020  | 0.0037  | 0.0044  |
| IR Inten --    | 0.0085  | 0.3404  | 0.6586  |

|                |         |         |         |
|----------------|---------|---------|---------|
| S <sub>1</sub> | 1       | 2       | 3       |
|                | A       | A       | A       |
| Frequencies -- | 18.4757 | 23.5065 | 30.2912 |
| Red. masses -- | 6.6991  | 6.5636  | 9.7131  |
| Frc consts --  | 0.0013  | 0.0021  | 0.0053  |
| IR Inten --    | 71.2214 | 1.4435  | 16.2754 |

|                |         |         |         |
|----------------|---------|---------|---------|
| T <sub>1</sub> | 1       | 2       | 3       |
|                | A       | A       | A       |
| Frequencies -- | 21.1226 | 25.0045 | 30.5105 |
| Red. masses -- | 7.4545  | 6.4932  | 8.4710  |
| Frc consts --  | 0.0020  | 0.0024  | 0.0046  |
| IR Inten --    | 0.9515  | 0.0003  | 0.8710  |

|                |         |         |         |
|----------------|---------|---------|---------|
| T <sub>2</sub> | 1       | 2       | 3       |
|                | A       | A       | A       |
| Frequencies -- | 20.3558 | 27.0297 | 32.5528 |
| Red. masses -- | 8.0482  | 7.9921  | 7.4562  |
| Frc consts --  | 0.0020  | 0.0034  | 0.0047  |
| IR Inten --    | 0.1396  | 0.7786  | 5.1674  |

## 2.4 Full CDA Results

Charge decomposition analysis is widespread adopted for structural analysis. It was firstly proposed by Dapprich et al.,<sup>1</sup> expanded by Gorelsky et al. (ECDA)<sup>2</sup> and generalized by Tian Lu et al. (GCDA)<sup>3</sup>. In this work, GCDA are used for studying electronic structure of **Ir1**.

Fragment orbitals that contribute over 1% to complex orbitals have been listed below for complex orbitals range from MO 101 to 150 and such range has already covered all orbitals that may be of importance to the coordinating structure of **Ir1**.

Occupation number of orbital 101 of the complex:2.00000000

|                            |                                |               |         |
|----------------------------|--------------------------------|---------------|---------|
| Orbital                    | 45 of fragment 1, Occ: 2.00000 | Contribution: | 4.52 %  |
| Orbital                    | 48 of fragment 1, Occ: 2.00000 | Contribution: | 10.31 % |
| Orbital                    | 49 of fragment 1, Occ: 2.00000 | Contribution: | 6.30 %  |
| Orbital                    | 51 of fragment 1, Occ: 2.00000 | Contribution: | 7.74 %  |
| Orbital                    | 61 of fragment 1, Occ: 2.00000 | Contribution: | 2.38 %  |
| Orbital                    | 38 of fragment 4, Occ: 2.00000 | Contribution: | 14.18 % |
| Orbital                    | 39 of fragment 4, Occ: 2.00000 | Contribution: | 37.31 % |
| Orbital                    | 40 of fragment 4, Occ: 2.00000 | Contribution: | 9.65 %  |
| Orbital                    | 46 of fragment 4, Occ: 2.00000 | Contribution: | 1.58 %  |
| Sum of values shown above: |                                |               | 93.96 % |

Occupation number of orbital 102 of the complex:2.00000000

|                            |                                |               |         |
|----------------------------|--------------------------------|---------------|---------|
| Orbital                    | 45 of fragment 1, Occ: 2.00000 | Contribution: | 2.97 %  |
| Orbital                    | 48 of fragment 1, Occ: 2.00000 | Contribution: | 16.98 % |
| Orbital                    | 49 of fragment 1, Occ: 2.00000 | Contribution: | 2.18 %  |
| Orbital                    | 51 of fragment 1, Occ: 2.00000 | Contribution: | 25.41 % |
| Orbital                    | 61 of fragment 1, Occ: 2.00000 | Contribution: | 3.81 %  |
| Orbital                    | 36 of fragment 4, Occ: 2.00000 | Contribution: | 1.43 %  |
| Orbital                    | 38 of fragment 4, Occ: 2.00000 | Contribution: | 4.05 %  |
| Orbital                    | 40 of fragment 4, Occ: 2.00000 | Contribution: | 32.99 % |
| Orbital                    | 42 of fragment 4, Occ: 2.00000 | Contribution: | 3.59 %  |
| Orbital                    | 45 of fragment 4, Occ: 2.00000 | Contribution: | 1.55 %  |
| Sum of values shown above: |                                |               | 94.97 % |

Occupation number of orbital 103 of the complex:2.00000000

|         |                                |               |         |
|---------|--------------------------------|---------------|---------|
| Orbital | 48 of fragment 1, Occ: 2.00000 | Contribution: | 3.62 %  |
| Orbital | 51 of fragment 1, Occ: 2.00000 | Contribution: | 11.91 % |
| Orbital | 33 of fragment 4, Occ: 2.00000 | Contribution: | 1.95 %  |
| Orbital | 36 of fragment 4, Occ: 2.00000 | Contribution: | 4.09 %  |
| Orbital | 37 of fragment 4, Occ: 2.00000 | Contribution: | 1.85 %  |
| Orbital | 39 of fragment 4, Occ: 2.00000 | Contribution: | 7.36 %  |
| Orbital | 40 of fragment 4, Occ: 2.00000 | Contribution: | 1.82 %  |

|                            |                                |               |         |
|----------------------------|--------------------------------|---------------|---------|
| Orbital                    | 42 of fragment 4, Occ: 2.00000 | Contribution: | 50.42 % |
| Orbital                    | 45 of fragment 4, Occ: 2.00000 | Contribution: | 2.73 %  |
| Orbital                    | 46 of fragment 4, Occ: 2.00000 | Contribution: | 7.11 %  |
| Orbital                    | 52 of fragment 4, Occ: 2.00000 | Contribution: | 1.43 %  |
| Sum of values shown above: |                                |               | 94.29 % |

Occupation number of orbital 104 of the complex:2.00000000

|                            |                                |               |         |
|----------------------------|--------------------------------|---------------|---------|
| Orbital                    | 47 of fragment 1, Occ: 2.00000 | Contribution: | 1.23 %  |
| Orbital                    | 50 of fragment 1, Occ: 2.00000 | Contribution: | 7.07 %  |
| Orbital                    | 52 of fragment 1, Occ: 2.00000 | Contribution: | 86.72 % |
| Sum of values shown above: |                                |               | 95.02 % |

Occupation number of orbital 105 of the complex:2.00000000

|                            |                                |               |         |
|----------------------------|--------------------------------|---------------|---------|
| Orbital                    | 46 of fragment 1, Occ: 2.00000 | Contribution: | 3.15 %  |
| Orbital                    | 7 of fragment 2, Occ: 2.00000  | Contribution: | 1.22 %  |
| Orbital                    | 43 of fragment 4, Occ: 2.00000 | Contribution: | 81.45 % |
| Orbital                    | 47 of fragment 4, Occ: 2.00000 | Contribution: | 5.63 %  |
| Orbital                    | 49 of fragment 4, Occ: 2.00000 | Contribution: | 1.15 %  |
| Orbital                    | 51 of fragment 4, Occ: 2.00000 | Contribution: | 1.57 %  |
| Orbital                    | 54 of fragment 4, Occ: 2.00000 | Contribution: | 1.22 %  |
| Sum of values shown above: |                                |               | 95.39 % |

Occupation number of orbital 106 of the complex:2.00000000

|                            |                                |               |         |
|----------------------------|--------------------------------|---------------|---------|
| Orbital                    | 45 of fragment 1, Occ: 2.00000 | Contribution: | 14.10 % |
| Orbital                    | 48 of fragment 1, Occ: 2.00000 | Contribution: | 3.55 %  |
| Orbital                    | 51 of fragment 1, Occ: 2.00000 | Contribution: | 5.60 %  |
| Orbital                    | 57 of fragment 1, Occ: 2.00000 | Contribution: | 22.23 % |
| Orbital                    | 61 of fragment 1, Occ: 2.00000 | Contribution: | 1.19 %  |
| Orbital                    | 8 of fragment 2, Occ: 0.00000  | Contribution: | 1.69 %  |
| Orbital                    | 9 of fragment 2, Occ: 0.00000  | Contribution: | 7.63 %  |
| Orbital                    | 36 of fragment 4, Occ: 2.00000 | Contribution: | 1.69 %  |
| Orbital                    | 37 of fragment 4, Occ: 2.00000 | Contribution: | 1.13 %  |
| Orbital                    | 40 of fragment 4, Occ: 2.00000 | Contribution: | 19.02 % |
| Orbital                    | 42 of fragment 4, Occ: 2.00000 | Contribution: | 4.02 %  |
| Orbital                    | 44 of fragment 4, Occ: 2.00000 | Contribution: | 6.03 %  |
| Orbital                    | 55 of fragment 4, Occ: 2.00000 | Contribution: | 3.01 %  |
| Sum of values shown above: |                                |               | 90.89 % |

Occupation number of orbital 107 of the complex:2.00000000

|                            |                                |               |         |
|----------------------------|--------------------------------|---------------|---------|
| Orbital                    | 45 of fragment 1, Occ: 2.00000 | Contribution: | 5.05 %  |
| Orbital                    | 48 of fragment 1, Occ: 2.00000 | Contribution: | 21.13 % |
| Orbital                    | 51 of fragment 1, Occ: 2.00000 | Contribution: | 31.25 % |
| Orbital                    | 57 of fragment 1, Occ: 2.00000 | Contribution: | 12.91 % |
| Orbital                    | 61 of fragment 1, Occ: 2.00000 | Contribution: | 13.38 % |
| Orbital                    | 8 of fragment 2, Occ: 0.00000  | Contribution: | 3.76 %  |
| Orbital                    | 10 of fragment 2, Occ: 0.00000 | Contribution: | 1.30 %  |
| Orbital                    | 40 of fragment 4, Occ: 2.00000 | Contribution: | 3.46 %  |
| Orbital                    | 44 of fragment 4, Occ: 2.00000 | Contribution: | 1.51 %  |
| Sum of values shown above: |                                |               | 93.73 % |

Occupation number of orbital 108 of the complex:2.00000000

|                            |                                |               |         |
|----------------------------|--------------------------------|---------------|---------|
| Orbital                    | 45 of fragment 1, Occ: 2.00000 | Contribution: | 3.51 %  |
| Orbital                    | 49 of fragment 1, Occ: 2.00000 | Contribution: | 1.22 %  |
| Orbital                    | 51 of fragment 1, Occ: 2.00000 | Contribution: | 7.98 %  |
| Orbital                    | 57 of fragment 1, Occ: 2.00000 | Contribution: | 7.62 %  |
| Orbital                    | 61 of fragment 1, Occ: 2.00000 | Contribution: | 6.28 %  |
| Orbital                    | 9 of fragment 2, Occ: 0.00000  | Contribution: | 3.31 %  |
| Orbital                    | 10 of fragment 2, Occ: 0.00000 | Contribution: | 3.00 %  |
| Orbital                    | 7 of fragment 3, Occ: 2.00000  | Contribution: | 1.84 %  |
| Orbital                    | 9 of fragment 3, Occ: 2.00000  | Contribution: | 1.08 %  |
| Orbital                    | 36 of fragment 4, Occ: 2.00000 | Contribution: | 2.94 %  |
| Orbital                    | 37 of fragment 4, Occ: 2.00000 | Contribution: | 1.37 %  |
| Orbital                    | 38 of fragment 4, Occ: 2.00000 | Contribution: | 3.31 %  |
| Orbital                    | 39 of fragment 4, Occ: 2.00000 | Contribution: | 2.73 %  |
| Orbital                    | 40 of fragment 4, Occ: 2.00000 | Contribution: | 2.27 %  |
| Orbital                    | 42 of fragment 4, Occ: 2.00000 | Contribution: | 8.71 %  |
| Orbital                    | 44 of fragment 4, Occ: 2.00000 | Contribution: | 22.97 % |
| Orbital                    | 46 of fragment 4, Occ: 2.00000 | Contribution: | 1.88 %  |
| Orbital                    | 48 of fragment 4, Occ: 2.00000 | Contribution: | 3.66 %  |
| Orbital                    | 55 of fragment 4, Occ: 2.00000 | Contribution: | 6.20 %  |
| Sum of values shown above: |                                |               | 91.88 % |

Occupation number of orbital 109 of the complex:2.00000000

|         |                                |               |         |
|---------|--------------------------------|---------------|---------|
| Orbital | 54 of fragment 1, Occ: 2.00000 | Contribution: | 1.47 %  |
| Orbital | 34 of fragment 4, Occ: 2.00000 | Contribution: | 1.10 %  |
| Orbital | 35 of fragment 4, Occ: 2.00000 | Contribution: | 1.32 %  |
| Orbital | 39 of fragment 4, Occ: 2.00000 | Contribution: | 1.07 %  |
| Orbital | 42 of fragment 4, Occ: 2.00000 | Contribution: | 10.28 % |

|                            |                                |               |         |
|----------------------------|--------------------------------|---------------|---------|
| Orbital                    | 45 of fragment 4, Occ: 2.00000 | Contribution: | 64.05 % |
| Orbital                    | 46 of fragment 4, Occ: 2.00000 | Contribution: | 12.39 % |
| Orbital                    | 48 of fragment 4, Occ: 2.00000 | Contribution: | 2.62 %  |
| Sum of values shown above: |                                |               | 94.30 % |

Occupation number of orbital 110 of the complex: 2.00000000

|                            |                                |               |         |
|----------------------------|--------------------------------|---------------|---------|
| Orbital                    | 46 of fragment 1, Occ: 2.00000 | Contribution: | 2.33 %  |
| Orbital                    | 47 of fragment 1, Occ: 2.00000 | Contribution: | 5.58 %  |
| Orbital                    | 50 of fragment 1, Occ: 2.00000 | Contribution: | 4.17 %  |
| Orbital                    | 55 of fragment 1, Occ: 2.00000 | Contribution: | 14.40 % |
| Orbital                    | 59 of fragment 1, Occ: 2.00000 | Contribution: | 43.12 % |
| Orbital                    | 60 of fragment 1, Occ: 2.00000 | Contribution: | 1.57 %  |
| Orbital                    | 6 of fragment 2, Occ: 2.00000  | Contribution: | 2.81 %  |
| Orbital                    | 7 of fragment 2, Occ: 2.00000  | Contribution: | 7.01 %  |
| Orbital                    | 43 of fragment 4, Occ: 2.00000 | Contribution: | 8.61 %  |
| Orbital                    | 47 of fragment 4, Occ: 2.00000 | Contribution: | 2.33 %  |
| Orbital                    | 54 of fragment 4, Occ: 2.00000 | Contribution: | 1.26 %  |
| Sum of values shown above: |                                |               | 93.21 % |

Occupation number of orbital 111 of the complex: 2.00000000

|                            |                                |               |         |
|----------------------------|--------------------------------|---------------|---------|
| Orbital                    | 44 of fragment 1, Occ: 2.00000 | Contribution: | 4.60 %  |
| Orbital                    | 49 of fragment 1, Occ: 2.00000 | Contribution: | 1.23 %  |
| Orbital                    | 54 of fragment 1, Occ: 2.00000 | Contribution: | 53.16 % |
| Orbital                    | 58 of fragment 1, Occ: 2.00000 | Contribution: | 5.55 %  |
| Orbital                    | 63 of fragment 1, Occ: 0.00000 | Contribution: | 1.32 %  |
| Orbital                    | 5 of fragment 2, Occ: 2.00000  | Contribution: | 2.20 %  |
| Orbital                    | 6 of fragment 2, Occ: 2.00000  | Contribution: | 3.00 %  |
| Orbital                    | 7 of fragment 2, Occ: 2.00000  | Contribution: | 2.47 %  |
| Orbital                    | 9 of fragment 2, Occ: 0.00000  | Contribution: | 1.15 %  |
| Orbital                    | 7 of fragment 3, Occ: 2.00000  | Contribution: | 1.18 %  |
| Orbital                    | 39 of fragment 4, Occ: 2.00000 | Contribution: | 1.24 %  |
| Orbital                    | 44 of fragment 4, Occ: 2.00000 | Contribution: | 4.75 %  |
| Orbital                    | 45 of fragment 4, Occ: 2.00000 | Contribution: | 9.62 %  |
| Orbital                    | 55 of fragment 4, Occ: 2.00000 | Contribution: | 1.16 %  |
| Sum of values shown above: |                                |               | 92.62 % |

Occupation number of orbital 112 of the complex: 2.00000000

|         |                                |               |         |
|---------|--------------------------------|---------------|---------|
| Orbital | 46 of fragment 1, Occ: 2.00000 | Contribution: | 7.14 %  |
| Orbital | 47 of fragment 1, Occ: 2.00000 | Contribution: | 2.02 %  |
| Orbital | 50 of fragment 1, Occ: 2.00000 | Contribution: | 2.01 %  |
| Orbital | 55 of fragment 1, Occ: 2.00000 | Contribution: | 32.58 % |

|                            |                                |               |         |
|----------------------------|--------------------------------|---------------|---------|
| Orbital                    | 59 of fragment 1, Occ: 2.00000 | Contribution: | 24.58 % |
| Orbital                    | 5 of fragment 2, Occ: 2.00000  | Contribution: | 10.90 % |
| Orbital                    | 6 of fragment 2, Occ: 2.00000  | Contribution: | 2.36 %  |
| Orbital                    | 7 of fragment 2, Occ: 2.00000  | Contribution: | 2.03 %  |
| Orbital                    | 8 of fragment 3, Occ: 2.00000  | Contribution: | 1.28 %  |
| Orbital                    | 41 of fragment 4, Occ: 2.00000 | Contribution: | 2.23 %  |
| Orbital                    | 43 of fragment 4, Occ: 2.00000 | Contribution: | 2.16 %  |
| Orbital                    | 47 of fragment 4, Occ: 2.00000 | Contribution: | 3.74 %  |
| Sum of values shown above: |                                |               | 93.03 % |

Occupation number of orbital 113 of the complex:2.00000000

|                            |                                |               |         |
|----------------------------|--------------------------------|---------------|---------|
| Orbital                    | 54 of fragment 1, Occ: 2.00000 | Contribution: | 4.68 %  |
| Orbital                    | 8 of fragment 2, Occ: 0.00000  | Contribution: | 1.06 %  |
| Orbital                    | 9 of fragment 2, Occ: 0.00000  | Contribution: | 7.80 %  |
| Orbital                    | 10 of fragment 2, Occ: 0.00000 | Contribution: | 2.65 %  |
| Orbital                    | 7 of fragment 3, Occ: 2.00000  | Contribution: | 3.18 %  |
| Orbital                    | 9 of fragment 3, Occ: 2.00000  | Contribution: | 5.56 %  |
| Orbital                    | 39 of fragment 4, Occ: 2.00000 | Contribution: | 1.88 %  |
| Orbital                    | 40 of fragment 4, Occ: 2.00000 | Contribution: | 1.03 %  |
| Orbital                    | 42 of fragment 4, Occ: 2.00000 | Contribution: | 6.19 %  |
| Orbital                    | 44 of fragment 4, Occ: 2.00000 | Contribution: | 9.91 %  |
| Orbital                    | 45 of fragment 4, Occ: 2.00000 | Contribution: | 13.05 % |
| Orbital                    | 46 of fragment 4, Occ: 2.00000 | Contribution: | 20.73 % |
| Orbital                    | 48 of fragment 4, Occ: 2.00000 | Contribution: | 7.65 %  |
| Orbital                    | 52 of fragment 4, Occ: 2.00000 | Contribution: | 2.13 %  |
| Orbital                    | 55 of fragment 4, Occ: 2.00000 | Contribution: | 6.07 %  |
| Sum of values shown above: |                                |               | 93.57 % |

Occupation number of orbital 114 of the complex:2.00000000

|                            |                                |               |         |
|----------------------------|--------------------------------|---------------|---------|
| Orbital                    | 46 of fragment 1, Occ: 2.00000 | Contribution: | 1.33 %  |
| Orbital                    | 53 of fragment 1, Occ: 2.00000 | Contribution: | 96.04 % |
| Sum of values shown above: |                                |               | 97.36 % |

Occupation number of orbital 115 of the complex:2.00000000

|         |                                |               |         |
|---------|--------------------------------|---------------|---------|
| Orbital | 54 of fragment 1, Occ: 2.00000 | Contribution: | 6.04 %  |
| Orbital | 9 of fragment 2, Occ: 0.00000  | Contribution: | 4.53 %  |
| Orbital | 10 of fragment 2, Occ: 0.00000 | Contribution: | 1.40 %  |
| Orbital | 7 of fragment 3, Occ: 2.00000  | Contribution: | 1.18 %  |
| Orbital | 9 of fragment 3, Occ: 2.00000  | Contribution: | 2.97 %  |
| Orbital | 38 of fragment 4, Occ: 2.00000 | Contribution: | 1.99 %  |
| Orbital | 44 of fragment 4, Occ: 2.00000 | Contribution: | 39.11 % |



|                            |                                |               |         |
|----------------------------|--------------------------------|---------------|---------|
| Orbital                    | 45 of fragment 4, Occ: 2.00000 | Contribution: | 2.67 %  |
| Orbital                    | 46 of fragment 4, Occ: 2.00000 | Contribution: | 26.14 % |
| Orbital                    | 48 of fragment 4, Occ: 2.00000 | Contribution: | 1.42 %  |
| Orbital                    | 55 of fragment 4, Occ: 2.00000 | Contribution: | 5.06 %  |
| Sum of values shown above: |                                |               | 92.53 % |

Occupation number of orbital 116 of the complex:2.00000000

|                            |                                |               |         |
|----------------------------|--------------------------------|---------------|---------|
| Orbital                    | 54 of fragment 1, Occ: 2.00000 | Contribution: | 1.04 %  |
| Orbital                    | 57 of fragment 1, Occ: 2.00000 | Contribution: | 7.63 %  |
| Orbital                    | 61 of fragment 1, Occ: 2.00000 | Contribution: | 11.36 % |
| Orbital                    | 39 of fragment 4, Occ: 2.00000 | Contribution: | 5.39 %  |
| Orbital                    | 40 of fragment 4, Occ: 2.00000 | Contribution: | 3.02 %  |
| Orbital                    | 42 of fragment 4, Occ: 2.00000 | Contribution: | 4.06 %  |
| Orbital                    | 46 of fragment 4, Occ: 2.00000 | Contribution: | 1.50 %  |
| Orbital                    | 52 of fragment 4, Occ: 2.00000 | Contribution: | 57.63 % |
| Sum of values shown above: |                                |               | 91.63 % |

Occupation number of orbital 117 of the complex:2.00000000

|                            |                                |               |         |
|----------------------------|--------------------------------|---------------|---------|
| Orbital                    | 49 of fragment 1, Occ: 2.00000 | Contribution: | 5.34 %  |
| Orbital                    | 54 of fragment 1, Occ: 2.00000 | Contribution: | 4.13 %  |
| Orbital                    | 56 of fragment 1, Occ: 2.00000 | Contribution: | 80.11 % |
| Orbital                    | 58 of fragment 1, Occ: 2.00000 | Contribution: | 5.39 %  |
| Orbital                    | 44 of fragment 4, Occ: 2.00000 | Contribution: | 1.02 %  |
| Sum of values shown above: |                                |               | 95.99 % |

Occupation number of orbital 118 of the complex:2.00000000

|                            |                                |               |         |
|----------------------------|--------------------------------|---------------|---------|
| Orbital                    | 55 of fragment 1, Occ: 2.00000 | Contribution: | 11.66 % |
| Orbital                    | 41 of fragment 4, Occ: 2.00000 | Contribution: | 2.49 %  |
| Orbital                    | 43 of fragment 4, Occ: 2.00000 | Contribution: | 2.28 %  |
| Orbital                    | 47 of fragment 4, Occ: 2.00000 | Contribution: | 76.32 % |
| Orbital                    | 49 of fragment 4, Occ: 2.00000 | Contribution: | 1.38 %  |
| Orbital                    | 50 of fragment 4, Occ: 2.00000 | Contribution: | 1.23 %  |
| Sum of values shown above: |                                |               | 95.36 % |

Occupation number of orbital 119 of the complex:2.00000000

|                            |                                |               |         |
|----------------------------|--------------------------------|---------------|---------|
| Orbital                    | 44 of fragment 4, Occ: 2.00000 | Contribution: | 3.34 %  |
| Orbital                    | 46 of fragment 4, Occ: 2.00000 | Contribution: | 18.87 % |
| Orbital                    | 48 of fragment 4, Occ: 2.00000 | Contribution: | 73.91 % |
| Sum of values shown above: |                                |               | 96.12 % |

Occupation number of orbital 120 of the complex:2.00000000

|                            |                                |               |         |
|----------------------------|--------------------------------|---------------|---------|
| Orbital                    | 59 of fragment 1, Occ: 2.00000 | Contribution: | 5.60 %  |
| Orbital                    | 5 of fragment 2, Occ: 2.00000  | Contribution: | 2.14 %  |
| Orbital                    | 6 of fragment 2, Occ: 2.00000  | Contribution: | 6.17 %  |
| Orbital                    | 7 of fragment 2, Occ: 2.00000  | Contribution: | 1.83 %  |
| Orbital                    | 41 of fragment 4, Occ: 2.00000 | Contribution: | 6.21 %  |
| Orbital                    | 43 of fragment 4, Occ: 2.00000 | Contribution: | 1.82 %  |
| Orbital                    | 47 of fragment 4, Occ: 2.00000 | Contribution: | 1.70 %  |
| Orbital                    | 49 of fragment 4, Occ: 2.00000 | Contribution: | 64.58 % |
| Orbital                    | 50 of fragment 4, Occ: 2.00000 | Contribution: | 3.55 %  |
| Sum of values shown above: |                                |               | 93.60 % |

Occupation number of orbital 121 of the complex:2.00000000

|                            |                                |               |         |
|----------------------------|--------------------------------|---------------|---------|
| Orbital                    | 54 of fragment 1, Occ: 2.00000 | Contribution: | 15.30 % |
| Orbital                    | 56 of fragment 1, Occ: 2.00000 | Contribution: | 11.62 % |
| Orbital                    | 57 of fragment 1, Occ: 2.00000 | Contribution: | 1.20 %  |
| Orbital                    | 58 of fragment 1, Occ: 2.00000 | Contribution: | 63.67 % |
| Orbital                    | 5 of fragment 2, Occ: 2.00000  | Contribution: | 1.09 %  |
| Orbital                    | 6 of fragment 2, Occ: 2.00000  | Contribution: | 1.48 %  |
| Orbital                    | 7 of fragment 2, Occ: 2.00000  | Contribution: | 1.22 %  |
| Sum of values shown above: |                                |               | 95.57 % |

Occupation number of orbital 122 of the complex:2.00000000

|                            |                                |               |         |
|----------------------------|--------------------------------|---------------|---------|
| Orbital                    | 55 of fragment 1, Occ: 2.00000 | Contribution: | 12.77 % |
| Orbital                    | 5 of fragment 2, Occ: 2.00000  | Contribution: | 5.54 %  |
| Orbital                    | 7 of fragment 2, Occ: 2.00000  | Contribution: | 2.91 %  |
| Orbital                    | 47 of fragment 4, Occ: 2.00000 | Contribution: | 5.12 %  |
| Orbital                    | 49 of fragment 4, Occ: 2.00000 | Contribution: | 1.51 %  |
| Orbital                    | 50 of fragment 4, Occ: 2.00000 | Contribution: | 57.79 % |
| Orbital                    | 51 of fragment 4, Occ: 2.00000 | Contribution: | 5.91 %  |
| Orbital                    | 53 of fragment 4, Occ: 2.00000 | Contribution: | 1.26 %  |
| Orbital                    | 54 of fragment 4, Occ: 2.00000 | Contribution: | 2.87 %  |
| Sum of values shown above: |                                |               | 95.69 % |

Occupation number of orbital 123 of the complex:2.00000000

|         |                                |               |         |
|---------|--------------------------------|---------------|---------|
| Orbital | 55 of fragment 1, Occ: 2.00000 | Contribution: | 15.36 % |
| Orbital | 60 of fragment 1, Occ: 2.00000 | Contribution: | 11.20 % |
| Orbital | 5 of fragment 2, Occ: 2.00000  | Contribution: | 8.73 %  |
| Orbital | 7 of fragment 2, Occ: 2.00000  | Contribution: | 4.12 %  |
| Orbital | 8 of fragment 3, Occ: 2.00000  | Contribution: | 1.35 %  |

|                            |                                |               |         |
|----------------------------|--------------------------------|---------------|---------|
| Orbital                    | 43 of fragment 4, Occ: 2.00000 | Contribution: | 1.08 %  |
| Orbital                    | 49 of fragment 4, Occ: 2.00000 | Contribution: | 2.20 %  |
| Orbital                    | 50 of fragment 4, Occ: 2.00000 | Contribution: | 31.99 % |
| Orbital                    | 51 of fragment 4, Occ: 2.00000 | Contribution: | 17.49 % |
| Orbital                    | 54 of fragment 4, Occ: 2.00000 | Contribution: | 2.30 %  |
| Sum of values shown above: |                                |               | 95.82 % |

Occupation number of orbital 124 of the complex:2.00000000

|                            |                                |               |         |
|----------------------------|--------------------------------|---------------|---------|
| Orbital                    | 54 of fragment 1, Occ: 2.00000 | Contribution: | 3.35 %  |
| Orbital                    | 58 of fragment 1, Occ: 2.00000 | Contribution: | 13.50 % |
| Orbital                    | 5 of fragment 2, Occ: 2.00000  | Contribution: | 9.55 %  |
| Orbital                    | 6 of fragment 2, Occ: 2.00000  | Contribution: | 13.01 % |
| Orbital                    | 7 of fragment 2, Occ: 2.00000  | Contribution: | 10.70 % |
| Orbital                    | 8 of fragment 2, Occ: 0.00000  | Contribution: | 2.15 %  |
| Orbital                    | 9 of fragment 2, Occ: 0.00000  | Contribution: | 2.48 %  |
| Orbital                    | 7 of fragment 3, Occ: 2.00000  | Contribution: | 3.00 %  |
| Orbital                    | 8 of fragment 3, Occ: 2.00000  | Contribution: | 11.19 % |
| Orbital                    | 9 of fragment 3, Occ: 2.00000  | Contribution: | 15.87 % |
| Orbital                    | 48 of fragment 4, Occ: 2.00000 | Contribution: | 3.56 %  |
| Orbital                    | 55 of fragment 4, Occ: 2.00000 | Contribution: | 4.99 %  |
| Sum of values shown above: |                                |               | 93.35 % |

Occupation number of orbital 125 of the complex:2.00000000

|                            |                                |               |         |
|----------------------------|--------------------------------|---------------|---------|
| Orbital                    | 60 of fragment 1, Occ: 2.00000 | Contribution: | 65.81 % |
| Orbital                    | 6 of fragment 2, Occ: 2.00000  | Contribution: | 1.27 %  |
| Orbital                    | 51 of fragment 4, Occ: 2.00000 | Contribution: | 25.60 % |
| Orbital                    | 54 of fragment 4, Occ: 2.00000 | Contribution: | 1.65 %  |
| Sum of values shown above: |                                |               | 94.33 % |

Occupation number of orbital 126 of the complex:2.00000000

|         |                                |               |         |
|---------|--------------------------------|---------------|---------|
| Orbital | 55 of fragment 1, Occ: 2.00000 | Contribution: | 5.06 %  |
| Orbital | 60 of fragment 1, Occ: 2.00000 | Contribution: | 18.03 % |
| Orbital | 5 of fragment 2, Occ: 2.00000  | Contribution: | 2.32 %  |
| Orbital | 6 of fragment 2, Occ: 2.00000  | Contribution: | 6.00 %  |
| Orbital | 7 of fragment 2, Occ: 2.00000  | Contribution: | 17.11 % |
| Orbital | 13 of fragment 2, Occ: 0.00000 | Contribution: | 1.79 %  |
| Orbital | 7 of fragment 3, Occ: 2.00000  | Contribution: | 1.73 %  |
| Orbital | 8 of fragment 3, Occ: 2.00000  | Contribution: | 14.04 % |
| Orbital | 9 of fragment 3, Occ: 2.00000  | Contribution: | 6.62 %  |
| Orbital | 49 of fragment 4, Occ: 2.00000 | Contribution: | 2.68 %  |
| Orbital | 50 of fragment 4, Occ: 2.00000 | Contribution: | 2.22 %  |

Orbital 51 of fragment 4, Occ: 2.00000 Contribution: 20.15 %  
Sum of values shown above: 97.76 %

Occupation number of orbital 127 of the complex:2.00000000

Orbital 59 of fragment 1, Occ: 2.00000 Contribution: 6.92 %  
Orbital 5 of fragment 2, Occ: 2.00000 Contribution: 15.47 %  
Orbital 6 of fragment 2, Occ: 2.00000 Contribution: 32.06 %  
Orbital 7 of fragment 2, Occ: 2.00000 Contribution: 6.37 %  
Orbital 49 of fragment 4, Occ: 2.00000 Contribution: 17.52 %  
Orbital 51 of fragment 4, Occ: 2.00000 Contribution: 16.09 %  
Sum of values shown above: 94.42 %

Occupation number of orbital 128 of the complex:2.00000000

Orbital 54 of fragment 1, Occ: 2.00000 Contribution: 4.53 %  
Orbital 56 of fragment 1, Occ: 2.00000 Contribution: 1.16 %  
Orbital 58 of fragment 1, Occ: 2.00000 Contribution: 2.85 %  
Orbital 63 of fragment 1, Occ: 0.00000 Contribution: 1.35 %  
Orbital 7 of fragment 3, Occ: 2.00000 Contribution: 36.20 %  
Orbital 9 of fragment 3, Occ: 2.00000 Contribution: 18.14 %  
Orbital 55 of fragment 4, Occ: 2.00000 Contribution: 27.31 %  
Sum of values shown above: 91.54 %

Occupation number of orbital 129 of the complex:2.00000000

Orbital 55 of fragment 1, Occ: 2.00000 Contribution: 1.20 %  
Orbital 59 of fragment 1, Occ: 2.00000 Contribution: 1.40 %  
Orbital 5 of fragment 2, Occ: 2.00000 Contribution: 5.24 %  
Orbital 7 of fragment 2, Occ: 2.00000 Contribution: 8.91 %  
Orbital 13 of fragment 2, Occ: 0.00000 Contribution: 2.43 %  
Orbital 7 of fragment 3, Occ: 2.00000 Contribution: 4.45 %  
Orbital 8 of fragment 3, Occ: 2.00000 Contribution: 36.11 %  
Orbital 9 of fragment 3, Occ: 2.00000 Contribution: 17.03 %  
Orbital 51 of fragment 4, Occ: 2.00000 Contribution: 9.31 %  
Orbital 54 of fragment 4, Occ: 2.00000 Contribution: 10.09 %  
Sum of values shown above: 96.17 %

Occupation number of orbital 130 of the complex:2.00000000

Orbital 54 of fragment 1, Occ: 2.00000 Contribution: 1.17 %  
Orbital 58 of fragment 1, Occ: 2.00000 Contribution: 1.47 %  
Orbital 63 of fragment 1, Occ: 0.00000 Contribution: 2.14 %  
Orbital 5 of fragment 2, Occ: 2.00000 Contribution: 6.56 %

|                            |                                |               |         |
|----------------------------|--------------------------------|---------------|---------|
| Orbital                    | 6 of fragment 2, Occ: 2.00000  | Contribution: | 8.94 %  |
| Orbital                    | 7 of fragment 2, Occ: 2.00000  | Contribution: | 7.35 %  |
| Orbital                    | 8 of fragment 2, Occ: 0.00000  | Contribution: | 2.23 %  |
| Orbital                    | 9 of fragment 2, Occ: 0.00000  | Contribution: | 1.79 %  |
| Orbital                    | 11 of fragment 2, Occ: 0.00000 | Contribution: | 2.57 %  |
| Orbital                    | 7 of fragment 3, Occ: 2.00000  | Contribution: | 33.36 % |
| Orbital                    | 8 of fragment 3, Occ: 2.00000  | Contribution: | 18.08 % |
| Orbital                    | 9 of fragment 3, Occ: 2.00000  | Contribution: | 10.49 % |
| Sum of values shown above: |                                |               | 96.13 % |

Occupation number of orbital 131 of the complex:2.00000000

|                            |                                |               |         |
|----------------------------|--------------------------------|---------------|---------|
| Orbital                    | 53 of fragment 4, Occ: 2.00000 | Contribution: | 94.92 % |
| Orbital                    | 54 of fragment 4, Occ: 2.00000 | Contribution: | 1.70 %  |
| Sum of values shown above: |                                |               | 96.63 % |

Occupation number of orbital 132 of the complex:2.00000000

|                            |                                |               |         |
|----------------------------|--------------------------------|---------------|---------|
| Orbital                    | 5 of fragment 2, Occ: 2.00000  | Contribution: | 7.50 %  |
| Orbital                    | 7 of fragment 2, Occ: 2.00000  | Contribution: | 6.11 %  |
| Orbital                    | 17 of fragment 2, Occ: 0.00000 | Contribution: | -1.08 % |
| Orbital                    | 8 of fragment 3, Occ: 2.00000  | Contribution: | 3.88 %  |
| Orbital                    | 9 of fragment 3, Occ: 2.00000  | Contribution: | 1.83 %  |
| Orbital                    | 51 of fragment 4, Occ: 2.00000 | Contribution: | 1.76 %  |
| Orbital                    | 53 of fragment 4, Occ: 2.00000 | Contribution: | 1.28 %  |
| Orbital                    | 54 of fragment 4, Occ: 2.00000 | Contribution: | 74.96 % |
| Sum of values shown above: |                                |               | 96.23 % |

Occupation number of orbital 133 of the complex:0.00000000

|                            |                                |               |         |
|----------------------------|--------------------------------|---------------|---------|
| Orbital                    | 63 of fragment 1, Occ: 0.00000 | Contribution: | 90.24 % |
| Orbital                    | 5 of fragment 2, Occ: 2.00000  | Contribution: | 1.07 %  |
| Orbital                    | 6 of fragment 2, Occ: 2.00000  | Contribution: | 1.46 %  |
| Orbital                    | 7 of fragment 2, Occ: 2.00000  | Contribution: | 1.20 %  |
| Orbital                    | 9 of fragment 2, Occ: 0.00000  | Contribution: | 1.14 %  |
| Orbital                    | 9 of fragment 3, Occ: 2.00000  | Contribution: | 1.54 %  |
| Sum of values shown above: |                                |               | 96.66 % |

Occupation number of orbital 134 of the complex:0.00000000

|                            |                                |               |         |
|----------------------------|--------------------------------|---------------|---------|
| Orbital                    | 62 of fragment 1, Occ: 0.00000 | Contribution: | 97.42 % |
| Sum of values shown above: |                                |               | 97.42 % |

Occupation number of orbital 135 of the complex:0.00000000  
Orbital 5 of fragment 2, Occ: 2.00000 Contribution: 1.71 %  
Orbital 6 of fragment 2, Occ: 2.00000 Contribution: 1.10 %  
Orbital 56 of fragment 4, Occ: 0.00000 Contribution: 88.95 %  
Orbital 57 of fragment 4, Occ: 0.00000 Contribution: 2.06 %  
Orbital 65 of fragment 4, Occ: 0.00000 Contribution: 2.53 %  
Sum of values shown above: 96.35 %

Occupation number of orbital 136 of the complex:0.00000000  
Orbital 65 of fragment 1, Occ: 0.00000 Contribution: 92.54 %  
Orbital 66 of fragment 1, Occ: 0.00000 Contribution: 5.11 %  
Sum of values shown above: 97.65 %

Occupation number of orbital 137 of the complex:0.00000000  
Orbital 64 of fragment 1, Occ: 0.00000 Contribution: 93.27 %  
Orbital 5 of fragment 2, Occ: 2.00000 Contribution: 1.96 %  
Orbital 7 of fragment 2, Occ: 2.00000 Contribution: 1.87 %  
Orbital 57 of fragment 4, Occ: 0.00000 Contribution: 1.31 %  
Sum of values shown above: 98.41 %

Occupation number of orbital 138 of the complex:0.00000000  
Orbital 64 of fragment 1, Occ: 0.00000 Contribution: 1.56 %  
Orbital 56 of fragment 4, Occ: 0.00000 Contribution: 1.86 %  
Orbital 57 of fragment 4, Occ: 0.00000 Contribution: 92.79 %  
Sum of values shown above: 96.20 %

Occupation number of orbital 139 of the complex:0.00000000  
Orbital 65 of fragment 1, Occ: 0.00000 Contribution: 5.45 %  
Orbital 66 of fragment 1, Occ: 0.00000 Contribution: 92.46 %  
Sum of values shown above: 97.91 %

Occupation number of orbital 140 of the complex:0.00000000  
Orbital 57 of fragment 1, Occ: 2.00000 Contribution: 5.00 %  
Orbital 61 of fragment 1, Occ: 2.00000 Contribution: 27.27 %  
Orbital 70 of fragment 1, Occ: 0.00000 Contribution: 5.26 %  
Orbital 8 of fragment 2, Occ: 0.00000 Contribution: 34.72 %  
Orbital 9 of fragment 2, Occ: 0.00000 Contribution: 25.57 %  
Orbital 18 of fragment 2, Occ: 0.00000 Contribution: -4.08 %  
Orbital 19 of fragment 2, Occ: 0.00000 Contribution: -6.31 %

|                            |                                |               |         |
|----------------------------|--------------------------------|---------------|---------|
| Orbital                    | 52 of fragment 4, Occ: 2.00000 | Contribution: | 4.29 %  |
| Orbital                    | 55 of fragment 4, Occ: 2.00000 | Contribution: | 1.63 %  |
| Sum of values shown above: |                                |               | 93.36 % |

Occupation number of orbital 141 of the complex:0.00000000

|                            |                                |               |         |
|----------------------------|--------------------------------|---------------|---------|
| Orbital                    | 67 of fragment 1, Occ: 0.00000 | Contribution: | 75.27 % |
| Orbital                    | 58 of fragment 4, Occ: 0.00000 | Contribution: | 23.09 % |
| Sum of values shown above: |                                |               | 98.36 % |

Occupation number of orbital 142 of the complex:0.00000000

|                            |                                |               |         |
|----------------------------|--------------------------------|---------------|---------|
| Orbital                    | 67 of fragment 1, Occ: 0.00000 | Contribution: | 23.17 % |
| Orbital                    | 58 of fragment 4, Occ: 0.00000 | Contribution: | 74.06 % |
| Sum of values shown above: |                                |               | 97.23 % |

Occupation number of orbital 143 of the complex:0.00000000

|                            |                                |               |         |
|----------------------------|--------------------------------|---------------|---------|
| Orbital                    | 57 of fragment 1, Occ: 2.00000 | Contribution: | 4.87 %  |
| Orbital                    | 61 of fragment 1, Occ: 2.00000 | Contribution: | 2.85 %  |
| Orbital                    | 68 of fragment 1, Occ: 0.00000 | Contribution: | 2.03 %  |
| Orbital                    | 5 of fragment 2, Occ: 2.00000  | Contribution: | 2.14 %  |
| Orbital                    | 6 of fragment 2, Occ: 2.00000  | Contribution: | 2.88 %  |
| Orbital                    | 7 of fragment 2, Occ: 2.00000  | Contribution: | 2.40 %  |
| Orbital                    | 8 of fragment 2, Occ: 0.00000  | Contribution: | 20.51 % |
| Orbital                    | 9 of fragment 2, Occ: 0.00000  | Contribution: | 19.74 % |
| Orbital                    | 15 of fragment 2, Occ: 0.00000 | Contribution: | -1.00 % |
| Orbital                    | 18 of fragment 2, Occ: 0.00000 | Contribution: | -6.11 % |
| Orbital                    | 19 of fragment 2, Occ: 0.00000 | Contribution: | -2.66 % |
| Orbital                    | 7 of fragment 3, Occ: 2.00000  | Contribution: | 3.31 %  |
| Orbital                    | 9 of fragment 3, Occ: 2.00000  | Contribution: | 4.42 %  |
| Orbital                    | 52 of fragment 4, Occ: 2.00000 | Contribution: | 3.39 %  |
| Orbital                    | 55 of fragment 4, Occ: 2.00000 | Contribution: | 28.49 % |
| Orbital                    | 60 of fragment 4, Occ: 0.00000 | Contribution: | 7.29 %  |
| Orbital                    | 62 of fragment 4, Occ: 0.00000 | Contribution: | 1.43 %  |
| Sum of values shown above: |                                |               | 96.00 % |

Occupation number of orbital 144 of the complex:0.00000000

|                            |                                |               |         |
|----------------------------|--------------------------------|---------------|---------|
| Orbital                    | 59 of fragment 4, Occ: 0.00000 | Contribution: | 95.69 % |
| Orbital                    | 70 of fragment 4, Occ: 0.00000 | Contribution: | 1.08 %  |
| Sum of values shown above: |                                |               | 96.77 % |

Occupation number of orbital 145 of the complex:0.00000000

|                            |                                |               |         |
|----------------------------|--------------------------------|---------------|---------|
| Orbital                    | 68 of fragment 1, Occ: 0.00000 | Contribution: | 29.05 % |
| Orbital                    | 8 of fragment 2, Occ: 0.00000  | Contribution: | 1.23 %  |
| Orbital                    | 9 of fragment 2, Occ: 0.00000  | Contribution: | 1.10 %  |
| Orbital                    | 14 of fragment 2, Occ: 0.00000 | Contribution: | 1.37 %  |
| Orbital                    | 60 of fragment 4, Occ: 0.00000 | Contribution: | 44.33 % |
| Orbital                    | 61 of fragment 4, Occ: 0.00000 | Contribution: | 6.31 %  |
| Orbital                    | 62 of fragment 4, Occ: 0.00000 | Contribution: | 8.90 %  |
| Orbital                    | 64 of fragment 4, Occ: 0.00000 | Contribution: | 2.36 %  |
| Sum of values shown above: |                                |               | 94.64 % |

Occupation number of orbital 146 of the complex:0.00000000

|                            |                                |               |         |
|----------------------------|--------------------------------|---------------|---------|
| Orbital                    | 68 of fragment 1, Occ: 0.00000 | Contribution: | 63.84 % |
| Orbital                    | 8 of fragment 2, Occ: 0.00000  | Contribution: | 1.28 %  |
| Orbital                    | 9 of fragment 2, Occ: 0.00000  | Contribution: | 4.16 %  |
| Orbital                    | 55 of fragment 4, Occ: 2.00000 | Contribution: | 2.61 %  |
| Orbital                    | 60 of fragment 4, Occ: 0.00000 | Contribution: | 17.97 % |
| Orbital                    | 61 of fragment 4, Occ: 0.00000 | Contribution: | 2.06 %  |
| Orbital                    | 62 of fragment 4, Occ: 0.00000 | Contribution: | 4.16 %  |
| Sum of values shown above: |                                |               | 96.09 % |

Occupation number of orbital 147 of the complex:0.00000000

|                            |                                |               |         |
|----------------------------|--------------------------------|---------------|---------|
| Orbital                    | 69 of fragment 1, Occ: 0.00000 | Contribution: | 90.60 % |
| Orbital                    | 71 of fragment 1, Occ: 0.00000 | Contribution: | 1.62 %  |
| Orbital                    | 13 of fragment 2, Occ: 0.00000 | Contribution: | 2.43 %  |
| Orbital                    | 65 of fragment 4, Occ: 0.00000 | Contribution: | 3.53 %  |
| Sum of values shown above: |                                |               | 98.17 % |

Occupation number of orbital 148 of the complex:0.00000000

|                            |                                |               |         |
|----------------------------|--------------------------------|---------------|---------|
| Orbital                    | 69 of fragment 1, Occ: 0.00000 | Contribution: | 4.93 %  |
| Orbital                    | 5 of fragment 2, Occ: 2.00000  | Contribution: | 1.15 %  |
| Orbital                    | 13 of fragment 2, Occ: 0.00000 | Contribution: | 1.79 %  |
| Orbital                    | 56 of fragment 4, Occ: 0.00000 | Contribution: | 3.62 %  |
| Orbital                    | 65 of fragment 4, Occ: 0.00000 | Contribution: | 79.69 % |
| Orbital                    | 72 of fragment 4, Occ: 0.00000 | Contribution: | 6.05 %  |
| Sum of values shown above: |                                |               | 97.24 % |

Occupation number of orbital 149 of the complex:0.00000000

|         |                                |               |         |
|---------|--------------------------------|---------------|---------|
| Orbital | 70 of fragment 1, Occ: 0.00000 | Contribution: | 61.65 % |
| Orbital | 72 of fragment 1, Occ: 0.00000 | Contribution: | 4.14 %  |



|                            |                                |               |         |
|----------------------------|--------------------------------|---------------|---------|
| Orbital                    | 73 of fragment 1, Occ: 0.00000 | Contribution: | 2.87 %  |
| Orbital                    | 75 of fragment 1, Occ: 0.00000 | Contribution: | 1.60 %  |
| Orbital                    | 76 of fragment 1, Occ: 0.00000 | Contribution: | 1.17 %  |
| Orbital                    | 8 of fragment 2, Occ: 0.00000  | Contribution: | 3.15 %  |
| Orbital                    | 9 of fragment 2, Occ: 0.00000  | Contribution: | 2.39 %  |
| Orbital                    | 10 of fragment 2, Occ: 0.00000 | Contribution: | 2.39 %  |
| Orbital                    | 11 of fragment 2, Occ: 0.00000 | Contribution: | 5.68 %  |
| Orbital                    | 14 of fragment 2, Occ: 0.00000 | Contribution: | 4.96 %  |
| Orbital                    | 19 of fragment 2, Occ: 0.00000 | Contribution: | -1.16 % |
| Orbital                    | 20 of fragment 2, Occ: 0.00000 | Contribution: | 1.16 %  |
| Orbital                    | 52 of fragment 4, Occ: 2.00000 | Contribution: | 1.98 %  |
| Orbital                    | 60 of fragment 4, Occ: 0.00000 | Contribution: | 1.58 %  |
| Orbital                    | 61 of fragment 4, Occ: 0.00000 | Contribution: | 4.43 %  |
| Sum of values shown above: |                                |               | 97.98 % |

Occupation number of orbital 150 of the complex:0.00000000

|                            |                                |               |         |
|----------------------------|--------------------------------|---------------|---------|
| Orbital                    | 63 of fragment 1, Occ: 0.00000 | Contribution: | 1.07 %  |
| Orbital                    | 70 of fragment 1, Occ: 0.00000 | Contribution: | 4.14 %  |
| Orbital                    | 73 of fragment 1, Occ: 0.00000 | Contribution: | 91.33 % |
| Sum of values shown above: |                                |               | 96.53 % |

## 2.5 Calculated Fluorescence Emission Rates

**Table S2.** Calculated oscillator strength ( $f$ ), fluorescence emission rates ( $k_f$ ) and Emission lifetime ( $\tau$ ).

| Mol.              | Ir1    | Ir2    | Ir3    | Ir4    | Ir5    | Ir6    | Ir7    | Ir8    | Ir9    |
|-------------------|--------|--------|--------|--------|--------|--------|--------|--------|--------|
| $f/a. u.$         | 0.0062 | 0.0060 | 0.0078 | 0.0082 | 0.0059 | 0.0058 | 0.0061 | 0.0058 | 0.0058 |
| $k_f/10^6 s^{-1}$ | 1.19   | 1.25   | 1.70   | 1.92   | 1.14   | 1.10   | 1.26   | 1.24   | 1.28   |
| $\tau/\mu s$      | 0.838  | 0.803  | 0.589  | 0.521  | 0.875  | 0.910  | 0.791  | 0.807  | 0.782  |

## 2.6 Calculated Phosphorescence Lifetime

**Table S3.** Calculated phosphorescence emission lifetime ( $\tau$ ).

| Mol. | initial minimum point | $\tau/s^a$ |
|------|-----------------------|------------|
| Ir1  | T <sub>1</sub>        | 0.200      |
|      | T <sub>2</sub>        | 0.018      |
| Ir2  | T <sub>1</sub>        | 0.677      |
|      | T <sub>2</sub>        | 0.298      |

<sup>a</sup> Phosphorescence emission lifetime is calculated by the Dalton program.

## 2.7 Calculated Excitation Energies and Oscillator Strengths

**Table S4.** Excitation energies and oscillator strengths obtained from TD-DFT calculation for Ir1.

| State           | $E / nm$ | $E / eV$ | $f$    | State           | $E / nm$ | $E / eV$ | $f$ |
|-----------------|----------|----------|--------|-----------------|----------|----------|-----|
| S <sub>1</sub>  | 537.59   | 2.3063   | 0.0049 | T <sub>1</sub>  | 555.73   | 2.2310   | 0   |
| S <sub>2</sub>  | 466.32   | 2.6588   | 0.0037 | T <sub>2</sub>  | 554.95   | 2.2341   | 0   |
| S <sub>3</sub>  | 390.81   | 3.1725   | 0.1846 | T <sub>3</sub>  | 490.47   | 2.5279   | 0   |
| S <sub>4</sub>  | 385.30   | 3.2178   | 0.0072 | T <sub>4</sub>  | 464.01   | 2.6720   | 0   |
| S <sub>5</sub>  | 381.53   | 3.2497   | 0.0000 | T <sub>5</sub>  | 412.09   | 3.0087   | 0   |
| S <sub>6</sub>  | 379.00   | 3.2713   | 0.0008 | T <sub>6</sub>  | 409.81   | 3.0254   | 0   |
| S <sub>7</sub>  | 357.62   | 3.4669   | 0.0186 | T <sub>7</sub>  | 382.41   | 3.2421   | 0   |
| S <sub>8</sub>  | 349.85   | 3.5440   | 0.0001 | T <sub>8</sub>  | 379.02   | 3.2712   | 0   |
| S <sub>9</sub>  | 343.73   | 3.6070   | 0.0001 | T <sub>9</sub>  | 373.48   | 3.3197   | 0   |
| S <sub>10</sub> | 339.51   | 3.6519   | 0.0137 | T <sub>10</sub> | 365.23   | 3.3946   | 0   |
| S <sub>11</sub> | 337.84   | 3.6699   | 0.0144 | T <sub>11</sub> | 365.05   | 3.3964   | 0   |
| S <sub>12</sub> | 333.86   | 3.7137   | 0.0193 | T <sub>12</sub> | 353.38   | 3.5085   | 0   |
| S <sub>13</sub> | 319.54   | 3.8801   | 0.0772 | T <sub>13</sub> | 348.24   | 3.5603   | 0   |
| S <sub>14</sub> | 312.68   | 3.9652   | 0.2770 | T <sub>14</sub> | 346.37   | 3.5795   | 0   |
| S <sub>15</sub> | 311.14   | 3.9849   | 0.2036 | T <sub>15</sub> | 344.61   | 3.5978   | 0   |

**Table S5.** Excitation energies and oscillator strengths obtained from TD-DFT calculation for Ir2.

| State          | $E / nm$ | $E / eV$ | $f$    | State          | $E / nm$ | $E / eV$ | $f$ |
|----------------|----------|----------|--------|----------------|----------|----------|-----|
| S <sub>1</sub> | 519.50   | 2.3866   | 0.0048 | T <sub>1</sub> | 581.40   | 2.1325   | 0   |
| S <sub>2</sub> | 451.21   | 2.7478   | 0.0049 | T <sub>2</sub> | 537.08   | 2.3085   | 0   |
| S <sub>3</sub> | 414.88   | 2.9885   | 0.1736 | T <sub>3</sub> | 481.75   | 2.5736   | 0   |
| S <sub>4</sub> | 381.28   | 3.2518   | 0.0196 | T <sub>4</sub> | 454.31   | 2.7291   | 0   |

|                        |        |        |        |                        |        |        |   |
|------------------------|--------|--------|--------|------------------------|--------|--------|---|
| <b>S</b> <sub>5</sub>  | 376.45 | 3.2935 | 0.0001 | <b>T</b> <sub>5</sub>  | 408.58 | 3.0345 | 0 |
| <b>S</b> <sub>6</sub>  | 370.95 | 3.3424 | 0.0003 | <b>T</b> <sub>6</sub>  | 405.50 | 3.0575 | 0 |
| <b>S</b> <sub>7</sub>  | 353.11 | 3.5112 | 0.0177 | <b>T</b> <sub>7</sub>  | 388.86 | 3.1884 | 0 |
| <b>S</b> <sub>8</sub>  | 342.87 | 3.6161 | 0.0004 | <b>T</b> <sub>8</sub>  | 378.41 | 3.2764 | 0 |
| <b>S</b> <sub>9</sub>  | 338.86 | 3.6588 | 0.0199 | <b>T</b> <sub>9</sub>  | 375.97 | 3.2977 | 0 |
| <b>S</b> <sub>10</sub> | 337.04 | 3.6787 | 0.0016 | <b>T</b> <sub>10</sub> | 371.28 | 3.3394 | 0 |
| <b>S</b> <sub>11</sub> | 331.79 | 3.7368 | 0.0054 | <b>T</b> <sub>11</sub> | 361.46 | 3.4301 | 0 |
| <b>S</b> <sub>12</sub> | 330.37 | 3.7529 | 0.0219 | <b>T</b> <sub>12</sub> | 357.73 | 3.4658 | 0 |
| <b>S</b> <sub>13</sub> | 329.27 | 3.7654 | 0.0010 | <b>T</b> <sub>13</sub> | 342.40 | 3.6210 | 0 |
| <b>S</b> <sub>14</sub> | 328.62 | 3.7728 | 0.2075 | <b>T</b> <sub>14</sub> | 341.00 | 3.6359 | 0 |
| <b>S</b> <sub>15</sub> | 320.71 | 3.8659 | 0.0492 | <b>T</b> <sub>15</sub> | 339.72 | 3.6496 | 0 |

**Table S6.** Excitation energies and oscillator strengths obtained from TD-DFT calculation for Ir3.

| <b>State</b>           | <b><i>E</i> / nm</b> | <b><i>E</i> / eV</b> | <b><i>f</i></b> | <b>State</b>           | <b><i>E</i> / nm</b> | <b><i>E</i> / eV</b> | <b><i>f</i></b> |
|------------------------|----------------------|----------------------|-----------------|------------------------|----------------------|----------------------|-----------------|
| <b>S</b> <sub>1</sub>  | 503.90               | 2.4605               | 0.0093          | <b>T</b> <sub>1</sub>  | 2227.56              | 0.5566               | 0               |
| <b>S</b> <sub>2</sub>  | 449.24               | 2.7599               | 0.0051          | <b>T</b> <sub>2</sub>  | 1309.00              | 0.9472               | 0               |
| <b>S</b> <sub>3</sub>  | 393.08               | 3.1541               | 0.1719          | <b>T</b> <sub>3</sub>  | 800.08               | 1.5496               | 0               |
| <b>S</b> <sub>4</sub>  | 375.05               | 3.3058               | 0.0312          | <b>T</b> <sub>4</sub>  | 668.33               | 1.8551               | 0               |
| <b>S</b> <sub>5</sub>  | 365.18               | 3.3951               | 0.0031          | <b>T</b> <sub>5</sub>  | 605.34               | 2.0482               | 0               |
| <b>S</b> <sub>6</sub>  | 360.62               | 3.4381               | 0.0015          | <b>T</b> <sub>6</sub>  | 578.74               | 2.1423               | 0               |
| <b>S</b> <sub>7</sub>  | 353.37               | 3.5086               | 0.0216          | <b>T</b> <sub>7</sub>  | 507.26               | 2.4442               | 0               |
| <b>S</b> <sub>8</sub>  | 337.62               | 3.6723               | 0.0000          | <b>T</b> <sub>8</sub>  | 467.19               | 2.6538               | 0               |
| <b>S</b> <sub>9</sub>  | 336.26               | 3.6872               | 0.0162          | <b>T</b> <sub>9</sub>  | 429.51               | 2.8867               | 0               |
| <b>S</b> <sub>10</sub> | 333.91               | 3.7131               | 0.0104          | <b>T</b> <sub>10</sub> | 399.30               | 3.1050               | 0               |
| <b>S</b> <sub>11</sub> | 331.79               | 3.7368               | 0.0104          | <b>T</b> <sub>11</sub> | 396.26               | 3.1288               | 0               |
| <b>S</b> <sub>12</sub> | 328.52               | 3.7740               | 0.0233          | <b>T</b> <sub>12</sub> | 393.25               | 3.1528               | 0               |
| <b>S</b> <sub>13</sub> | 319.36               | 3.8823               | 0.0752          | <b>T</b> <sub>13</sub> | 383.98               | 3.2289               | 0               |
| <b>S</b> <sub>14</sub> | 317.61               | 3.9037               | 0.0002          | <b>T</b> <sub>14</sub> | 383.34               | 3.2343               | 0               |
| <b>S</b> <sub>15</sub> | 311.25               | 3.9834               | 0.1758          | <b>T</b> <sub>15</sub> | 370.78               | 3.3439               | 0               |

**Table S7.** Excitation energies and oscillator strengths obtained from TD-DFT calculation for Ir4.

| <b>State</b>           | <b><i>E</i> / nm</b> | <b><i>E</i> / eV</b> | <b><i>f</i></b> | <b>State</b>           | <b><i>E</i> / nm</b> | <b><i>E</i> / eV</b> | <b><i>f</i></b> |
|------------------------|----------------------|----------------------|-----------------|------------------------|----------------------|----------------------|-----------------|
| <b>S</b> <sub>1</sub>  | 487.92               | 2.5411               | 0.0093          | <b>T</b> <sub>1</sub>  | 573.88               | 2.1605               | 0               |
| <b>S</b> <sub>2</sub>  | 435.20               | 2.8489               | 0.0095          | <b>T</b> <sub>2</sub>  | 569.86               | 2.1757               | 0               |
| <b>S</b> <sub>3</sub>  | 417.65               | 2.9686               | 0.1660          | <b>T</b> <sub>3</sub>  | 560.98               | 2.2101               | 0               |
| <b>S</b> <sub>4</sub>  | 370.85               | 3.3432               | 0.0381          | <b>T</b> <sub>4</sub>  | 460.25               | 2.6938               | 0               |
| <b>S</b> <sub>5</sub>  | 360.46               | 3.4396               | 0.0022          | <b>T</b> <sub>5</sub>  | 434.12               | 2.8560               | 0               |
| <b>S</b> <sub>6</sub>  | 352.82               | 3.5141               | 0.0019          | <b>T</b> <sub>6</sub>  | 403.98               | 3.0691               | 0               |
| <b>S</b> <sub>7</sub>  | 348.72               | 3.5554               | 0.0202          | <b>T</b> <sub>7</sub>  | 400.90               | 3.0927               | 0               |
| <b>S</b> <sub>8</sub>  | 339.29               | 3.6542               | 0.0166          | <b>T</b> <sub>8</sub>  | 386.79               | 3.2055               | 0               |
| <b>S</b> <sub>9</sub>  | 337.47               | 3.6739               | 0.0000          | <b>T</b> <sub>9</sub>  | 381.83               | 3.2471               | 0               |
| <b>S</b> <sub>10</sub> | 331.29               | 3.7424               | 0.0027          | <b>T</b> <sub>10</sub> | 378.41               | 3.2765               | 0               |
| <b>S</b> <sub>11</sub> | 328.92               | 3.7695               | 0.0040          | <b>T</b> <sub>11</sub> | 371.98               | 3.3331               | 0               |
| <b>S</b> <sub>12</sub> | 328.21               | 3.7776               | 0.1766          | <b>T</b> <sub>12</sub> | 356.37               | 3.4791               | 0               |

|                        |        |        |        |                        |        |        |   |
|------------------------|--------|--------|--------|------------------------|--------|--------|---|
| <b>S</b> <sub>13</sub> | 324.93 | 3.8158 | 0.0183 | <b>T</b> <sub>13</sub> | 350.54 | 3.5370 | 0 |
| <b>S</b> <sub>14</sub> | 324.08 | 3.8258 | 0.0188 | <b>T</b> <sub>14</sub> | 347.36 | 3.5694 | 0 |
| <b>S</b> <sub>15</sub> | 318.17 | 3.8968 | 0.0303 | <b>T</b> <sub>15</sub> | 341.14 | 3.6344 | 0 |

**Table S8.** Excitation energies and oscillator strengths obtained from TD-DFT calculation for Ir5.

| <b>State</b>           | <b><i>E</i> / nm</b> | <b><i>E</i> / eV</b> | <b><i>f</i></b> | <b>State</b>           | <b><i>E</i> / nm</b> | <b><i>E</i> / eV</b> | <b><i>f</i></b> |
|------------------------|----------------------|----------------------|-----------------|------------------------|----------------------|----------------------|-----------------|
| <b>S</b> <sub>1</sub>  | 535.73               | 2.3143               | 0.0048          | <b>T</b> <sub>1</sub>  | 602.31               | 2.0585               | 0               |
| <b>S</b> <sub>2</sub>  | 463.87               | 2.6728               | 0.0034          | <b>T</b> <sub>2</sub>  | 576.44               | 2.1508               | 0               |
| <b>S</b> <sub>3</sub>  | 400.04               | 3.0993               | 0.1860          | <b>T</b> <sub>3</sub>  | 561.54               | 2.2079               | 0               |
| <b>S</b> <sub>4</sub>  | 388.06               | 3.1950               | 0.0139          | <b>T</b> <sub>4</sub>  | 489.86               | 2.5310               | 0               |
| <b>S</b> <sub>5</sub>  | 381.85               | 3.2469               | 0.0012          | <b>T</b> <sub>5</sub>  | 442.42               | 2.8024               | 0               |
| <b>S</b> <sub>6</sub>  | 379.63               | 3.2660               | 0.0001          | <b>T</b> <sub>6</sub>  | 426.39               | 2.9078               | 0               |
| <b>S</b> <sub>7</sub>  | 358.25               | 3.4608               | 0.0181          | <b>T</b> <sub>7</sub>  | 412.76               | 3.0038               | 0               |
| <b>S</b> <sub>8</sub>  | 348.90               | 3.5536               | 0.0004          | <b>T</b> <sub>8</sub>  | 403.05               | 3.0762               | 0               |
| <b>S</b> <sub>9</sub>  | 338.12               | 3.6668               | 0.0311          | <b>T</b> <sub>9</sub>  | 390.80               | 3.1726               | 0               |
| <b>S</b> <sub>10</sub> | 337.97               | 3.6685               | 0.0111          | <b>T</b> <sub>10</sub> | 385.32               | 3.2177               | 0               |
| <b>S</b> <sub>11</sub> | 334.21               | 3.7098               | 0.0126          | <b>T</b> <sub>11</sub> | 375.95               | 3.2979               | 0               |
| <b>S</b> <sub>12</sub> | 333.28               | 3.7202               | 0.0025          | <b>T</b> <sub>12</sub> | 358.12               | 3.4620               | 0               |
| <b>S</b> <sub>13</sub> | 323.37               | 3.8342               | 0.0617          | <b>T</b> <sub>13</sub> | 354.10               | 3.5014               | 0               |
| <b>S</b> <sub>14</sub> | 318.45               | 3.8933               | 0.0007          | <b>T</b> <sub>14</sub> | 352.90               | 3.5133               | 0               |
| <b>S</b> <sub>15</sub> | 316.84               | 3.9132               | 0.2779          | <b>T</b> <sub>15</sub> | 348.21               | 3.5607               | 0               |

**Table S9.** Excitation energies and oscillator strengths obtained from TD-DFT calculation for Ir6.

| <b>State</b>           | <b><i>E</i> / nm</b> | <b><i>E</i> / eV</b> | <b><i>f</i></b> | <b>State</b>           | <b><i>E</i> / nm</b> | <b><i>E</i> / eV</b> | <b><i>f</i></b> |
|------------------------|----------------------|----------------------|-----------------|------------------------|----------------------|----------------------|-----------------|
| <b>S</b> <sub>1</sub>  | 540.49               | 2.2939               | 0.0048          | <b>T</b> <sub>1</sub>  | 2174.94              | 0.5701               | 0               |
| <b>S</b> <sub>2</sub>  | 467.80               | 2.6504               | 0.0031          | <b>T</b> <sub>2</sub>  | 1375.57              | 0.9013               | 0               |
| <b>S</b> <sub>3</sub>  | 393.91               | 3.1476               | 0.1343          | <b>T</b> <sub>3</sub>  | 810.15               | 1.5304               | 0               |
| <b>S</b> <sub>4</sub>  | 388.91               | 3.1880               | 0.0127          | <b>T</b> <sub>4</sub>  | 678.90               | 1.8262               | 0               |
| <b>S</b> <sub>5</sub>  | 382.63               | 3.2403               | 0.0012          | <b>T</b> <sub>5</sub>  | 606.05               | 2.0458               | 0               |
| <b>S</b> <sub>6</sub>  | 380.66               | 3.2571               | 0.0001          | <b>T</b> <sub>6</sub>  | 603.10               | 2.0558               | 0               |
| <b>S</b> <sub>7</sub>  | 359.18               | 3.4519               | 0.0183          | <b>T</b> <sub>7</sub>  | 512.02               | 2.4215               | 0               |
| <b>S</b> <sub>8</sub>  | 349.92               | 3.5432               | 0.0004          | <b>T</b> <sub>8</sub>  | 462.52               | 2.6806               | 0               |
| <b>S</b> <sub>9</sub>  | 339.78               | 3.6490               | 0.0123          | <b>T</b> <sub>9</sub>  | 426.55               | 2.9067               | 0               |
| <b>S</b> <sub>10</sub> | 338.91               | 3.6583               | 0.0278          | <b>T</b> <sub>10</sub> | 424.05               | 2.9238               | 0               |
| <b>S</b> <sub>11</sub> | 334.06               | 3.7115               | 0.0026          | <b>T</b> <sub>11</sub> | 403.42               | 3.0733               | 0               |
| <b>S</b> <sub>12</sub> | 333.88               | 3.7135               | 0.0150          | <b>T</b> <sub>12</sub> | 395.21               | 3.1371               | 0               |
| <b>S</b> <sub>13</sub> | 321.76               | 3.8533               | 0.0802          | <b>T</b> <sub>13</sub> | 389.20               | 3.1856               | 0               |
| <b>S</b> <sub>14</sub> | 314.12               | 3.9470               | 0.1636          | <b>T</b> <sub>14</sub> | 377.35               | 3.2856               | 0               |
| <b>S</b> <sub>15</sub> | 313.37               | 3.9565               | 0.0073          | <b>T</b> <sub>15</sub> | 368.76               | 3.3622               | 0               |

**Table S10.** Excitation energies and oscillator strengths obtained from TD-DFT calculation for Ir7.

| <b>State</b>          | <b><i>E</i> / nm</b> | <b><i>E</i> / eV</b> | <b><i>f</i></b> | <b>State</b>          | <b><i>E</i> / nm</b> | <b><i>E</i> / eV</b> | <b><i>f</i></b> |
|-----------------------|----------------------|----------------------|-----------------|-----------------------|----------------------|----------------------|-----------------|
| <b>S</b> <sub>1</sub> | 520.20               | 2.3834               | 0.0050          | <b>T</b> <sub>1</sub> | 599.53               | 2.0680               | 0               |
| <b>S</b> <sub>2</sub> | 451.90               | 2.7436               | 0.0061          | <b>T</b> <sub>2</sub> | 537.83               | 2.3053               | 0               |

|                       |        |        |        |                       |        |        |   |
|-----------------------|--------|--------|--------|-----------------------|--------|--------|---|
| <b>S<sub>3</sub></b>  | 421.21 | 2.9435 | 0.2416 | <b>T<sub>3</sub></b>  | 482.47 | 2.5698 | 0 |
| <b>S<sub>4</sub></b>  | 388.24 | 3.1935 | 0.0127 | <b>T<sub>4</sub></b>  | 455.48 | 2.7220 | 0 |
| <b>S<sub>5</sub></b>  | 379.07 | 3.2707 | 0.0008 | <b>T<sub>5</sub></b>  | 408.78 | 3.0331 | 0 |
| <b>S<sub>6</sub></b>  | 370.71 | 3.3445 | 0.0002 | <b>T<sub>6</sub></b>  | 406.29 | 3.0516 | 0 |
| <b>S<sub>7</sub></b>  | 358.58 | 3.4576 | 0.0186 | <b>T<sub>7</sub></b>  | 398.77 | 3.1091 | 0 |
| <b>S<sub>8</sub></b>  | 341.29 | 3.6328 | 0.0006 | <b>T<sub>8</sub></b>  | 379.24 | 3.2692 | 0 |
| <b>S<sub>9</sub></b>  | 340.00 | 3.6465 | 0.0000 | <b>T<sub>9</sub></b>  | 371.92 | 3.3336 | 0 |
| <b>S<sub>10</sub></b> | 337.55 | 3.6731 | 0.0785 | <b>T<sub>10</sub></b> | 370.44 | 3.3470 | 0 |
| <b>S<sub>11</sub></b> | 336.23 | 3.6874 | 0.0498 | <b>T<sub>11</sub></b> | 364.43 | 3.4022 | 0 |
| <b>S<sub>12</sub></b> | 333.18 | 3.7212 | 0.0002 | <b>T<sub>12</sub></b> | 362.65 | 3.4188 | 0 |
| <b>S<sub>13</sub></b> | 330.80 | 3.7480 | 0.0070 | <b>T<sub>13</sub></b> | 343.41 | 3.6104 | 0 |
| <b>S<sub>14</sub></b> | 330.23 | 3.7544 | 0.1405 | <b>T<sub>14</sub></b> | 343.37 | 3.6108 | 0 |
| <b>S<sub>15</sub></b> | 319.57 | 3.8798 | 0.0189 | <b>T<sub>15</sub></b> | 341.77 | 3.6277 | 0 |

**Table S11.** Excitation energies and oscillator strengths obtained from TD-DFT calculation for Ir8.

| <b>State</b>          | <b><i>E</i> / nm</b> | <b><i>E</i> / eV</b> | <b><i>f</i></b> | <b>State</b>          | <b><i>E</i> / nm</b> | <b><i>E</i> / eV</b> | <b><i>f</i></b> |
|-----------------------|----------------------|----------------------|-----------------|-----------------------|----------------------|----------------------|-----------------|
| <b>S<sub>1</sub></b>  | 513.67               | 2.4137               | 0.0048          | <b>T<sub>1</sub></b>  | 1033.35              | 1.1998               | 0               |
| <b>S<sub>2</sub></b>  | 446.23               | 2.7785               | 0.0097          | <b>T<sub>2</sub></b>  | 776.44               | 1.5968               | 0               |
| <b>S<sub>3</sub></b>  | 429.95               | 2.8837               | 0.2268          | <b>T<sub>3</sub></b>  | 665.90               | 1.8619               | 0               |
| <b>S<sub>4</sub></b>  | 384.76               | 3.2224               | 0.0157          | <b>T<sub>4</sub></b>  | 568.77               | 2.1799               | 0               |
| <b>S<sub>5</sub></b>  | 376.44               | 3.2936               | 0.0006          | <b>T<sub>5</sub></b>  | 496.89               | 2.4952               | 0               |
| <b>S<sub>6</sub></b>  | 368.86               | 3.3613               | 0.0002          | <b>T<sub>6</sub></b>  | 489.44               | 2.5332               | 0               |
| <b>S<sub>7</sub></b>  | 354.85               | 3.4940               | 0.0176          | <b>T<sub>7</sub></b>  | 434.51               | 2.8534               | 0               |
| <b>S<sub>8</sub></b>  | 345.69               | 3.5865               | 0.0001          | <b>T<sub>8</sub></b>  | 420.42               | 2.9491               | 0               |
| <b>S<sub>9</sub></b>  | 345.00               | 3.5937               | 0.0724          | <b>T<sub>9</sub></b>  | 409.43               | 3.0282               | 0               |
| <b>S<sub>10</sub></b> | 339.40               | 3.6530               | 0.0026          | <b>T<sub>10</sub></b> | 392.38               | 3.1598               | 0               |
| <b>S<sub>11</sub></b> | 336.99               | 3.6791               | 0.1891          | <b>T<sub>11</sub></b> | 390.99               | 3.1710               | 0               |
| <b>S<sub>12</sub></b> | 333.78               | 3.7146               | 0.0137          | <b>T<sub>12</sub></b> | 382.50               | 3.2414               | 0               |
| <b>S<sub>13</sub></b> | 329.54               | 3.7623               | 0.0001          | <b>T<sub>13</sub></b> | 371.45               | 3.3379               | 0               |
| <b>S<sub>14</sub></b> | 327.15               | 3.7898               | 0.0048          | <b>T<sub>14</sub></b> | 357.87               | 3.4645               | 0               |
| <b>S<sub>15</sub></b> | 321.86               | 3.8522               | 0.3066          | <b>T<sub>15</sub></b> | 348.39               | 3.5588               | 0               |

**Table S12.** Excitation energies and oscillator strengths obtained from TD-DFT calculation for Ir9.

| <b>State</b>          | <b><i>E</i> / nm</b> | <b><i>E</i> / eV</b> | <b><i>f</i></b> | <b>State</b>          | <b><i>E</i> / nm</b> | <b><i>E</i> / eV</b> | <b><i>f</i></b> |
|-----------------------|----------------------|----------------------|-----------------|-----------------------|----------------------|----------------------|-----------------|
| <b>S<sub>1</sub></b>  | 506.24               | 2.4491               | 0.0048          | <b>T<sub>1</sub></b>  | 1375.57              | 0.9013               | 0               |
| <b>S<sub>2</sub></b>  | 473.42               | 2.6189               | 0.2364          | <b>T<sub>2</sub></b>  | 1251.10              | 0.9910               | 0               |
| <b>S<sub>3</sub></b>  | 439.77               | 2.8193               | 0.0012          | <b>T<sub>3</sub></b>  | 717.02               | 1.7292               | 0               |
| <b>S<sub>4</sub></b>  | 383.32               | 3.2345               | 0.0159          | <b>T<sub>4</sub></b>  | 689.11               | 1.7992               | 0               |
| <b>S<sub>5</sub></b>  | 375.64               | 3.3006               | 0.0001          | <b>T<sub>5</sub></b>  | 621.73               | 1.9942               | 0               |
| <b>S<sub>6</sub></b>  | 375.25               | 3.3040               | 0.0005          | <b>T<sub>6</sub></b>  | 595.63               | 2.0816               | 0               |
| <b>S<sub>7</sub></b>  | 368.17               | 3.3676               | 0.1898          | <b>T<sub>7</sub></b>  | 533.32               | 2.3248               | 0               |
| <b>S<sub>8</sub></b>  | 364.06               | 3.4056               | 0.0002          | <b>T<sub>8</sub></b>  | 488.27               | 2.5392               | 0               |
| <b>S<sub>9</sub></b>  | 357.91               | 3.4641               | 0.0207          | <b>T<sub>9</sub></b>  | 442.39               | 2.8026               | 0               |
| <b>S<sub>10</sub></b> | 353.33               | 3.5090               | 0.0175          | <b>T<sub>10</sub></b> | 422.62               | 2.9337               | 0               |

|                       |        |        |        |                       |        |        |   |
|-----------------------|--------|--------|--------|-----------------------|--------|--------|---|
| <b>S<sub>11</sub></b> | 349.32 | 3.5493 | 0.2871 | <b>T<sub>11</sub></b> | 418.75 | 2.9608 | 0 |
| <b>S<sub>12</sub></b> | 336.01 | 3.6899 | 0.0045 | <b>T<sub>12</sub></b> | 407.27 | 3.0443 | 0 |
| <b>S<sub>13</sub></b> | 331.93 | 3.7353 | 0.0172 | <b>T<sub>13</sub></b> | 400.08 | 3.0989 | 0 |
| <b>S<sub>14</sub></b> | 327.14 | 3.7900 | 0.0003 | <b>T<sub>14</sub></b> | 398.07 | 3.1146 | 0 |
| <b>S<sub>15</sub></b> | 324.72 | 3.8181 | 0.0015 | <b>T<sub>15</sub></b> | 383.82 | 3.2303 | 0 |

### 3. References

1. Dapprich, S.; Frenking, G., Investigation of Donor-Acceptor Interactions: A Charge Decomposition Analysis Using Fragment Molecular Orbitals. *The Journal of Physical Chemistry* **1995**, *99*, 9352-9362.
2. Gorelsky, S. I.; Ghosh, S.; Solomon, E. I., Mechanism of N<sub>2</sub>O Reduction by the M<sub>4</sub>-S Tetranuclear Cu<sub>2</sub> Cluster of Nitrous Oxide Reductase. *Journal of the American Chemical Society* **2006**, *128*, 278-290.
3. Meng Xiao, T. L., Generalized Charge Decomposition Analysis (Gcda) Method. *Journal of Advances in Physical Chemistry* **2015**, *4*.
